# Supplementary material
Source: PubMed Central journal article supplement (PMC3957381)
Supplement: amiajnl-2013-001636-s1.pdf [file amiajnl-2013-001636-s1.pdf]

## **Appendix A: Search Strategy**

### **PubMed Search Strategy:**

("systematized nomenclature of medicine"[MeSH Terms] OR ("systematized"[All Fields] AND "nomenclature"[All Fields] AND "medicine"[All Fields]) OR "systematized nomenclature of medicine"[All Fields] OR "snomed"[All Fields]) AND ("2001-01-01"[PDAT] : "2012-12-31"[PDAT])

Last run: March 13, 2013

Number of results: 537

### **Embase Search Strategy:**

- 1 SNOMED.mp. or exp "Systematized Nomenclature of Medicine" / (823)
- 2 limit 1 to (english language and yr="2001 - 2012") (593)
- 3 SNOMED.af. (686)
- 4 limit 3 to (english language and yr="2001 - 2012") (472)
- 5 2 or 4 (594)

Last run: March 13, 2013

Number of results: 594
