# Supplementary material
Source: PubMed Central journal article supplement (PMC3957381)
Supplement: amiajnl-2013-001636-s2.pdf [file amiajnl-2013-001636-s2.pdf]

## Appendix B: Classification of Papers

- Refers to an id that was assigned to each paper that was retrieved.

| No | Id  | Reference                                                                                                                                                                                                                                                                             | Version | SNOMED CT Focus Category | Usage Category                | Domain                                | Country        | Year |
|----|-----|---------------------------------------------------------------------------------------------------------------------------------------------------------------------------------------------------------------------------------------------------------------------------------------|---------|--------------------------|-------------------------------|---------------------------------------|----------------|------|
| 1  | 600 | Arnot-Smith J, Smith AF Patient safety incidents involving neuromuscular blockade: analysis of the UK National Reporting and Learning System data from 2006 to 2008. <i>Anaesthesia</i> 2010 Nov; 65(11): 1106-13                                                                     | CT      | Evaluation               | Retrieve/analyse patient data | Anaesthesia                           | United Kingdom | 2010 |
| 2  | 684 | Benoit SR, McDonald LC, English R, Tokars JI Automated surveillance of <i>Clostridium difficile</i> infections using BioSense. <i>Infection control and hospital epidemiology : the official journal of the Society of Hospital Epidemiologists of America</i> 2011 Jan; 32(1): 26-33 | CT      | Evaluation               | Retrieve/analyse patient data | Laboratory                            | United States  | 2011 |
| 3  | 619 | Elkin PL, Froehling D, Wahner-Roedler D, Trusko B, Welsh G, Rosenbloom ST, Speroff T, Brown SH The Health Archetype Language (HAL-42): interface considerations. <i>International journal of medical informatics</i> 2010 Apr; 79(4): e71-5                                           | CT      | Evaluation               | Retrieve/analyse patient data | Other/multiple/unknown/not applicable | United States  | 2010 |
| 4  | 604 | Hussain F., Muller F., Husain E. Under-reporting of invasive malignant melanomas in North East of Scotland. <i>British Journal of Dermatology</i> 2010; 163: 67-                                                                                                                      | CT      | Evaluation               | Retrieve/analyse patient data | Cancer                                | United Kingdom | 2010 |
| 5  | 781 | Koopman B, Bruza P, Sitbon L, Lawley M Towards                                                                                                                                                                                                                                        | CT      | Evaluation               | Retrieve/analyse patient data | Hospital                              | Australia      | 2012 |

| No | Id  | Reference                                                                                                                                                                                                                                                                             | Version | SNOMED CT Focus Category | Usage Category                          | Domain                                | Country       | Year |
|----|-----|---------------------------------------------------------------------------------------------------------------------------------------------------------------------------------------------------------------------------------------------------------------------------------------|---------|--------------------------|-----------------------------------------|---------------------------------------|---------------|------|
|    |     | semantic search and inference in electronic medical records: An approach using concept--based information retrieval. The Australasian medical journal 2012;5(9):482-8                                                                                                                 |         |                          |                                         |                                       |               |      |
| 6  | 767 | Liaw ST, Chen HY, Maneze D, Taggart J, Dennis S, Vagholkar S, Bunker J Health reform: is routinely collected electronic information fit for purpose? Emergency medicine Australasia : EMA 2012 Feb;24(1):57-63                                                                        | CT      | Evaluation               | Retrieve/analyse patient data           | Emergency department/room             | Australia     | 2012 |
| 7  | 765 | Matheny ME, Fitzhenry F, Speroff T, Green JK, Griffith ML, Vasilevskis EE, Fielstein EM, Elkin PL, Brown SH Detection of infectious symptoms from VA emergency department and primary care clinical documentation. International journal of medical informatics 2012 Mar;81(3):143-56 | CT      | Evaluation               | Retrieve/analyse patient data           | Other/multiple/unknown/not applicable | United States | 2012 |
| 8  | 785 | Nguyen A, Moore J, Zuccon G, Lawley M, Colquist S Classification of pathology reports for cancer registry notifications. Studies in health technology and informatics 2012;178:150-6                                                                                                  | CT      | Evaluation               | Retrieve/analyse patient data           | Cancer                                | Australia     | 2012 |
| 9  | 444 | Alecu I, Bousquet C, Degoulet P, Jaulent MC PharmARTS: terminology web services for drug safety data coding and retrieval. Studies in health technology and informatics 2007;                                                                                                         | CT      | Implementation           | Description of implementation of SNOMED | Drugs                                 | France        | 2007 |

| No | Id  | Reference                                                                                                                                                                                                                                      | Version  | SNOMED CT Focus Category | Usage Category                          | Domain                                | Country       | Year |
|----|-----|------------------------------------------------------------------------------------------------------------------------------------------------------------------------------------------------------------------------------------------------|----------|--------------------------|-----------------------------------------|---------------------------------------|---------------|------|
|    |     | 129(Pt 1): 699-704                                                                                                                                                                                                                             |          |                          |                                         |                                       |               |      |
| 10 | 244 | Aller RD Making a case for computers to 'talk the talk'. CAP today / College of American Pathologists 2004 Feb; 18(2): 56-8, 60, 62 passim                                                                                                     | Multiple | Implementation           | Description of implementation of SNOMED | Pathology                             | United States | 2004 |
| 11 | 685 | Bakhshi-Raiez F, de Keizer NF, Cornet R, Dorrepaal M, Dongelmans D, Jaspers MW A usability evaluation of a SNOMED CT based compositional interface terminology for intensive care. International journal of medical informatics 2011 Oct 24;   | CT       | Implementation           | Description of implementation of SNOMED | Intensive care                        | Netherlands   | 2011 |
| 12 | 720 | Cao F, Sun X, Wang X, Li B, Li J, Pan Y Ontology-based knowledge management for personalized adverse drug events detection. Studies in health technology and informatics 2011; 169: 699-703                                                    | CT       | Implementation           | Description of implementation of SNOMED | Drugs                                 | South Korea   | 2011 |
| 13 | 272 | Cole CL, Kanter AS, Cummens M, Vostinar S, Naeymi-Rad F Using a terminology server and consumer search phrases to help patients find physicians with particular expertise. Studies in health technology and informatics 2004; 107(Pt 1): 492-6 | CT       | Implementation           | Description of implementation of SNOMED | Other/multiple/unknown/not applicable | United States | 2004 |
| 14 | 569 | Farfán Sedano FJ, Terrón Cuadrado M, García Rebolledo EM, Castellanos Clemente Y, Serrano Balazote P, Gómez Delgado A Implementation of                                                                                                        | CT       | Implementation           | Description of implementation of SNOMED | Drugs                                 | Spain         | 2009 |

| No | Id  | Reference                                                                                                                                                                                                                                | Version | SNOMED CT Focus Category | Usage Category                          | Domain                                | Country       | Year |
|----|-----|------------------------------------------------------------------------------------------------------------------------------------------------------------------------------------------------------------------------------------------|---------|--------------------------|-----------------------------------------|---------------------------------------|---------------|------|
|    |     | SNOMED CT to the medicines database of a general hospital. Studies in health technology and informatics 2009; 148: 123-30                                                                                                                |         |                          |                                         |                                       |               |      |
| 15 | 433 | Gambarte ML, Osornio AL, Martinez M, Reynoso G, Luna D, de Quiros FG A practical approach to advanced terminology services in health information systems. Studies in health technology and informatics 2007; 129(Pt 1): 621-5            | CT      | Implementation           | Description of implementation of SNOMED | Other/multiple/unknown/not applicable | Argentina     | 2007 |
| 16 | 686 | Kim HY, Park HA Development and evaluation of data entry templates based on the entity-attribute-value model for clinical decision support of pressure ulcer wound management. International journal of medical informatics 2011 Nov 10; | CT      | Implementation           | Description of implementation of SNOMED | Wounds                                | South Korea   | 2011 |
| 17 | 420 | Lee NJ, Bakken S Development of a prototype personal digital assistant-decision support system for the management of adult obesity. International journal of medical informatics 2007 Oct; 76 Suppl 2: S281-92                           | CT      | Implementation           | Description of implementation of SNOMED | Other/multiple/unknown/not applicable | United States | 2007 |
| 18 | 653 | Liu J, Lane K, Lo E, Lam M, Truong T, Veillette C Addressing SNOMED CT implementation challenges through multi-disciplinary collaboration. Studies in health technology and                                                              | CT      | Implementation           | Description of implementation of SNOMED | Other/multiple/unknown/not applicable | Canada        | 2010 |

| No | Id  | Reference                                                                                                                                                                                                                                                                                 | Version | SNOMED CT Focus Category | Usage Category                          | Domain                                | Country       | Year |
|----|-----|-------------------------------------------------------------------------------------------------------------------------------------------------------------------------------------------------------------------------------------------------------------------------------------------|---------|--------------------------|-----------------------------------------|---------------------------------------|---------------|------|
|    |     | informatics 2010; 160(Pt 2): 981-5                                                                                                                                                                                                                                                        |         |                          |                                         |                                       |               |      |
| 19 | 288 | Lusky K Pilot points way to speedier cancer surveillance. CAP today / College of American Pathologists 2005 Feb; 19(2): 5-6, 8                                                                                                                                                            | CT      | Implementation           | Description of implementation of SNOMED | Cancer                                | United States | 2005 |
| 20 | 440 | Navas H, Osornio AL, Baum A, Gomez A, Luna D, de Quiros FG Creation and evaluation of a terminology server for the interactive coding of discharge summaries. Studies in health technology and informatics 2007; 129(Pt 1): 650-4                                                         | CT      | Implementation           | Description of implementation of SNOMED | Hospital                              | Argentina     | 2007 |
| 21 | 436 | Richesson R, Syed A, Guillette H, Tuttle MS, Krischer J A web-based SNOMED CT browser: distributed and real-time use of SNOMED CT during the clinical research process. Studies in health technology and informatics 2007; 129(Pt 1): 631-5                                               | CT      | Implementation           | Description of implementation of SNOMED | Other/multiple/unknown/not applicable | United States | 2007 |
| 22 | 347 | Richesson R, Young K, Guillette H, Tuttle M, Abbondandolo M, Krischer J Standard terminology on demand: facilitating distributed and real-time use of SNOMED CT during the clinical research process. AMIA ... Annual Symposium proceedings / AMIA Symposium. AMIA Symposium 2006; : 1076 | CT      | Implementation           | Description of implementation of SNOMED | Other/multiple/unknown/not applicable | United States | 2006 |
| 23 | 355 | Robinson J, de Lusignan S,                                                                                                                                                                                                                                                                | CT      | Implementation           | Description of                          | Cardiology                            | United        | 2006 |

| No | Id  | Reference                                                                                                                                                                                                                                                                             | Version | SNOMED CT Focus Category | Usage Category                          | Domain         | Country       | Year |
|----|-----|---------------------------------------------------------------------------------------------------------------------------------------------------------------------------------------------------------------------------------------------------------------------------------------|---------|--------------------------|-----------------------------------------|----------------|---------------|------|
|    |     | Kostkova P, Madge B, Marsh A, Biniaris C The Primary Care Electronic Library: RSS feeds using SNOMED-CT indexing for dynamic content delivery. Informatics in primary care 2006; 14(4): 247-52                                                                                        |         |                          | implementation of SNOMED                |                | Kingdom       |      |
| 24 | 626 | Robinson TJ, DuVall SL, Wiggins RH Creation and storage of standards-based pre-scanning patient questionnaires in PACS as DICOM objects. Journal of digital imaging : the official journal of the Society for Computer Applications in Radiology 2011 Oct; 24(5): 823-7               | CT      | Implementation           | Description of implementation of SNOMED | Radiology      | United States | 2011 |
| 25 | 519 | Ryan A, Patrick J, Herkes R Introduction of enhancement technologies into the intensive care service, Royal Prince Alfred Hospital, Sydney. The HIM journal 2008; 37(1): 40-5                                                                                                         | CT      | Implementation           | Description of implementation of SNOMED | Intensive care | Australia     | 2008 |
| 26 | 673 | Sherman S, Shats O, Fleissner E, Bascom G, Yiee K, Copur M, Crow K, Rooney J, Mateen Z, Ketcham MA, Feng J, Sherman A, Gleason M, Kinarsky L, Silva-Lopez E, Edney J, Reed E, Berger A, Cowan K Multicenter breast cancer collaborative registry. Cancer informatics 2011; 10: 217-26 | CT      | Implementation           | Description of implementation of SNOMED | Cancer         | United States | 2011 |
| 27 | 674 | Sherman S, Shats O, Ketcham MA, Anderson MA, Whitcomb DC, Lynch HT, Ghiorzo P, Rubinstein WS, Sasson AR, Grizzle WE,                                                                                                                                                                  | CT      | Implementation           | Description of implementation of SNOMED | Cancer         | United States | 2011 |

| No | Id  | Reference                                                                                                                                                                                                                                                        | Version | SNOMED CT Focus Category | Usage Category                          | Domain                                | Country       | Year |
|----|-----|------------------------------------------------------------------------------------------------------------------------------------------------------------------------------------------------------------------------------------------------------------------|---------|--------------------------|-----------------------------------------|---------------------------------------|---------------|------|
|    |     | Haynatzki G, Feng J, Sherman A, Kinarsky L, Brand RE PCCR: Pancreatic Cancer Collaborative Registry. Cancer informatics 2011; 10: 83-91                                                                                                                          |         |                          |                                         |                                       |               |      |
| 28 | 389 | Sundvall E, Nyström M, Petersson H, Ahlfeldt H Interactive visualization and navigation of complex terminology systems, exemplified by SNOMED CT. Studies in health technology and informatics 2006; 124: 851-6                                                  | CT      | Implementation           | Description of implementation of SNOMED | Other/multiple/unknown/not applicable | Sweden        | 2006 |
| 29 | 215 | Van Berkum MM SNOMED CT encoded Cancer Protocols. AMIA ... Annual Symposium proceedings / AMIA Symposium. AMIA Symposium 2003; : 1039                                                                                                                            | CT      | Implementation           | Description of implementation of SNOMED | Cancer                                | United States | 2003 |
| 30 | 498 | Yang K, Evens MW, Trace DA Using a Java Dynamic Tree to manage the terminology in a suite of medical applications. Methods of information in medicine 2008; 47(6): 499-504                                                                                       | CT      | Implementation           | Description of implementation of SNOMED | Other/multiple/unknown/not applicable | United States | 2008 |
| 31 | 788 | Zaninelli M, Campagnoli A, Reyes M, Rojas V The O3-Vet project: Integration of a standard nomenclature of clinical terms in a veterinary electronic medical record for veterinary hospitals. Computer methods and programs in biomedicine 2012 Nov;108(2):760-72 | CT      | Implementation           | Description of implementation of SNOMED | Veterinary                            | Italy         | 2012 |
| 32 | 762 | Zetterberg C, Ahlzén K, Ericsson E, Kron B An                                                                                                                                                                                                                    | CT      | Implementation           | Description of implementation of SNOMED | Gynaecology                           | Sweden        | 2012 |

| No | Id  | Reference                                                                                                                                                                                                                                 | Version | SNOMED CT Focus Category | Usage Category                      | Domain            | Country       | Year |
|----|-----|-------------------------------------------------------------------------------------------------------------------------------------------------------------------------------------------------------------------------------------------|---------|--------------------------|-------------------------------------|-------------------|---------------|------|
|    |     | Example of a Multi-Professional Process-Oriented Structured Documentation Bound to SNOMED CT. Studies in health technology and informatics 2012;180:1215-7                                                                                |         |                          |                                     |                   |               |      |
| 33 | 562 | Beach K., Le H.V., Powell G., Pattishall E., Ryan P., Mera R. Performance of a semi-automated process for estimation of risk in a claims database. Pharmacoepidemiology and Drug Safety (PDS) 2009; 18: S164-                             | CT      | Implementation           | Used to classify or code in a study | Drugs             | United States | 2009 |
| 34 | 456 | Brown SH, Elkin PL, Rosenbloom ST, Fielstein E, Speroff T eQuality for all: Extending automated quality measurement of free text clinical narratives. AMIA ... Annual Symposium proceedings / AMIA Symposium. AMIA Symposium 2008; : 71-5 | CT      | Implementation           | Used to classify or code in a study | Hospital          | United States | 2008 |
| 35 | 285 | Elkin PL, Brown SH, Bauer BA, Husser CS, Carruth W, Bergstrom LR, Wahner-Roedler DL A controlled trial of automated classification of negation from clinical notes. BMC medical informatics and decision making 2005; 5: 13               | CT      | Implementation           | Used to classify or code in a study | Internal medicine | United States | 2005 |
| 36 | 462 | Elkin PL, Froehling D, Wahner-Roedler D, Trusko B, Welsh G, Ma H, Asatryan AX, Tokars JI, Rosenbloom ST, Brown SH NLP-based identification of pneumonia                                                                                   | CT      | Implementation           | Used to classify or code in a study | Radiology         | United States | 2008 |



| No | Id  | Reference                                                                                                                                                                                                                                                                                                         | Version | SNOMED CT Focus Category | Usage Category                      | Domain                                | Country       | Year |
|----|-----|-------------------------------------------------------------------------------------------------------------------------------------------------------------------------------------------------------------------------------------------------------------------------------------------------------------------|---------|--------------------------|-------------------------------------|---------------------------------------|---------------|------|
|    |     | cases from free-text radiological reports. AMIA ... Annual Symposium proceedings / AMIA Symposium. AMIA Symposium 2008; : 172-6                                                                                                                                                                                   |         |                          |                                     |                                       |               |      |
| 37 | 280 | Long W Extracting diagnoses from discharge summaries. AMIA ... Annual Symposium proceedings / AMIA Symposium. AMIA Symposium 2005; : 470-4                                                                                                                                                                        | CT      | Implementation           | Used to classify or code in a study | Other/multiple/unknown/not applicable | United States | 2005 |
| 38 | 527 | Lowe HJ, Huang Y, Regula DP Using a statistical natural language Parser augmented with the UMLS specialist lexicon to assign SNOMED CT codes to anatomic sites and pathologic diagnoses in full text pathology reports. AMIA ... Annual Symposium proceedings / AMIA Symposium. AMIA Symposium 2009; 2009: 386-90 | CT      | Implementation           | Used to classify or code in a study | Pathology                             | United States | 2009 |
| 39 | 764 | McBride SJ, Lawley MJ, Leroux H, Gibson S Using Australian medicines terminology (AMT) and SNOMED CT-AU to better support clinical research Studies in health technology and informatics 2012;178:144-9                                                                                                           | CT      | Implementation           | Used to classify or code in a study | Drugs                                 | Australia     | 2012 |
| 40 | 745 | McCoy AB, Wright A, Laxmisan A, Singh H, Sittig DF A prototype knowledge base and SMART app to facilitate organization of patient medications by clinical problems. AMIA ... Annual Symposium                                                                                                                     | CT      | Implementation           | Used to classify or code in a study | Drugs                                 | United States | 2011 |

| No | Id  | Reference                                                                                                                                                                                                                                                         | Version | SNOMED CT Focus Category | Usage Category                      | Domain                    | Country   | Year |
|----|-----|-------------------------------------------------------------------------------------------------------------------------------------------------------------------------------------------------------------------------------------------------------------------|---------|--------------------------|-------------------------------------|---------------------------|-----------|------|
|    |     | proceedings / AMIA Symposium. AMIA Symposium 2011;2011:888-94                                                                                                                                                                                                     |         |                          |                                     |                           |           |      |
| 41 | 717 | Nguyen A, Moore J, Lawley M, Hansen D, Colquist S Automatic extraction of cancer characteristics from free-text pathology reports for cancer notifications. Studies in health technology and informatics 2011; 168: 117-24                                        | CT      | Implementation           | Used to classify or code in a study | Cancer                    | Australia | 2011 |
| 42 | 858 | Nguyen A, Moore J, Zuccon G, Colquist S Towards a smart cancer registry Asia-Pac. J. Clin. Oncol. 2012; 8: 327                                                                                                                                                    | CT      | Implementation           | Used to classify or code in a study | Cancer                    | Australia | 2012 |
| 43 | 531 | Nguyen A.N., Lawley M.J., Hansen D.P., Bowman R.V., Clarke B.E., Duhig E.E., Colquist S. Surgical pathology cancer case checklist reporting from free text reports. Asia-Pacific Journal of Clinical Oncology 2009; 5: A218-A219                                  | CT      | Implementation           | Used to classify or code in a study | Cancer                    | Australia | 2009 |
| 44 | 635 | Nguyen AN, Lawley MJ, Hansen DP, Bowman RV, Clarke BE, Duhig EE, Colquist S Symbolic rule-based classification of lung cancer stages from free-text pathology reports. Journal of the American Medical Informatics Association : JAMIA 2010 Jul-Aug; 17(4): 440-5 | CT      | Implementation           | Used to classify or code in a study | Pathology                 | Australia | 2010 |
| 45 | 760 | Patrick J, Nguyen D, Wang T, Paoloni R Computational                                                                                                                                                                                                              | CT      | Implementation           | Used to classify or code in a study | Emergency department/room | Australia | 2012 |

| No | Id  | Reference                                                                                                                                                                                                                                | Version | SNOMED CT Focus Category | Usage Category                      | Domain                                | Country       | Year |
|----|-----|------------------------------------------------------------------------------------------------------------------------------------------------------------------------------------------------------------------------------------------|---------|--------------------------|-------------------------------------|---------------------------------------|---------------|------|
|    |     | recognition of SNOMED CT codes from ED case notes. Studies in health technology and informatics 2012;178:175-9                                                                                                                           |         |                          |                                     |                                       |               |      |
| 46 | 470 | Ruch P, Gobeill J, Lovis C, Geissbühler A Automatic medical encoding with SNOMED categories. BMC medical informatics and decision making 2008; 8 Suppl 1: S6                                                                             | CT      | Implementation           | Used to classify or code in a study | Other/multiple/unknown/not applicable | Switzerland   | 2008 |
| 47 | 533 | Shah NH, Jonquet C, Chiang AP, Butte AJ, Chen R, Musen MA Ontology-driven indexing of public datasets for translational bioinformatics. BMC bioinformatics 2009; 10 Suppl 2: S1                                                          | CT      | Implementation           | Used to classify or code in a study | Genetics                              | United States | 2009 |
| 48 | 662 | Tvede I, Bredegaard K, Andersen JS Quality improvements based on detailed and precise terminology. Studies in health technology and informatics 2010; 155: 71-7                                                                          | CT      | Implementation           | Used to classify or code in a study | Intensive care                        | Denmark       | 2010 |
| 49 | 744 | Wagholikar AS, Lawley MJ, Hansen DP, Chu K Identifying symptom groups from Emergency Department presenting complaint free text using SNOMED CT. AMIA ... Annual Symposium proceedings / AMIA Symposium. AMIA Symposium 2011;2011:1446-53 | CT      | Implementation           | Used to classify or code in a study | Emergency department/room             | Australia     | 2011 |
| 50 | 465 | Wahner-Roedler DL, Welsh GA, Trusko BE, Froehling DA, Froehling DA, Temesgen                                                                                                                                                             | CT      | Implementation           | Used to classify or code in a study | Pathology                             | United States | 2008 |

| No | Id  | Reference                                                                                                                                                                                                                                      | Version | SNOMED CT Focus Category | Usage Category                      | Domain                                | Country            | Year |
|----|-----|------------------------------------------------------------------------------------------------------------------------------------------------------------------------------------------------------------------------------------------------|---------|--------------------------|-------------------------------------|---------------------------------------|--------------------|------|
|    |     | Z, Elkin PL Using natural language processing for identification of pneumonia cases from clinical records of patients with serologically proven influenza. AMIA ... Annual Symposium proceedings / AMIA Symposium. AMIA Symposium 2008; : 1165 |         |                          |                                     |                                       |                    |      |
| 51 | 466 | Welsh G, Wahner-Roedler D, Froehling DA, Trusko B, Elkin P Whole record surveillance is superior to chief complaint surveillance for predicting influenza. AMIA ... Annual Symposium proceedings / AMIA Symposium. AMIA Symposium 2008; : 1173 | CT      | Implementation           | Used to classify or code in a study | Pathology                             | United States      | 2008 |
| 52 | 218 | Windle J, Van-Milligan G, Duffy S, McClay J, Campbell J Web-based physician order entry: an open source solution with broad physician involvement. AMIA ... Annual Symposium proceedings / AMIA Symposium. AMIA Symposium 2003; : 724-7        | CT      | Implementation           | Used to classify or code in a study | Other/multiple/unknown/not applicable | United States      | 2003 |
| 53 | 238 | DHHS to promote national paperless health system. Public health reports (Washington, D.C. : 1974) 2003 Nov-Dec; 118(6): 563                                                                                                                    | CT      | Not applicable           | As example                          | Other/multiple/unknown/not applicable | United States      | 2003 |
| 54 | 779 | Front matter. Studies in health technology and informatics 2012;179:i-xvii                                                                                                                                                                     | CT      | Not applicable           | As example                          | Other/multiple/unknown/not applicable | Multiple countries | 2012 |
| 55 | 874 | On not reinventing the wheel Nat. Genet. 2012; 44(3): 233                                                                                                                                                                                      | CT      | Not applicable           | As example                          | Genetics                              | United States      | 2012 |

| No | Id  | Reference                                                                                                                                                                                                                             | Version | SNOMED CT Focus Category | Usage Category | Domain                                | Country            | Year |
|----|-----|---------------------------------------------------------------------------------------------------------------------------------------------------------------------------------------------------------------------------------------|---------|--------------------------|----------------|---------------------------------------|--------------------|------|
| 56 | 570 | Bonney W Is it appropriate, or ethical, to use health data collected for the purpose of direct patient care to develop computerized predictive decision support tools? Studies in health technology and informatics 2009; 143: 115-21 | CT      | Not applicable           | As example     | Other/multiple/unknown/not applicable | Canada             | 2009 |
| 57 | 223 | Brown PJ, Warmington V, Laurence M, Prevost AT A methodology for the functional comparison of coding schemes in primary care. Informatics in primary care 2003; 11(3): 145-8                                                          | CT      | Not applicable           | As example     | Primary care                          | United Kingdom     | 2003 |
| 58 | 329 | Case JT Are we really communicating? Standard terminology versus terminology standards in veterinary clinical pathology. Veterinary clinical pathology / American Society for Veterinary Clinical Pathology 2005; 34(1): 5-6          | CT      | Not applicable           | As example     | Veterinary                            | United States      | 2005 |
| 59 | 311 | Ceusters W, Smith B, Goldberg L A terminological and ontological analysis of the NCI Thesaurus. Methods of information in medicine 2005; 44(4): 498-507                                                                               | CT      | Not applicable           | As example     | Cancer                                | Multiple countries | 2005 |
| 60 | 865 | Chen ES, Melton GB, Sarkar IN Translating standards into practice: Experiences and lessons learned in biomedicine and health care J. Biomed. Informatics 2012; 45(4): 609-612                                                         | CT      | Not applicable           | As example     | Other/multiple/unknown/not applicable | United States      | 2012 |
| 61 | 790 | Chute CG, Huff SM, Ferguson JA, Walker JM, Halamka JD                                                                                                                                                                                 | CT      | Not applicable           | As example     | Other/multiple/unknown/not applicable | United States      | 2012 |

| No | Id  | Reference                                                                                                                                                                                                                                | Version | SNOMED CT Focus Category | Usage Category | Domain                                | Country        | Year |
|----|-----|------------------------------------------------------------------------------------------------------------------------------------------------------------------------------------------------------------------------------------------|---------|--------------------------|----------------|---------------------------------------|----------------|------|
|    |     | There are important reasons for delaying implementation of the new ICD-10 coding system. Health affairs (Project Hope) 2012 Apr;31(4):836-42                                                                                             |         |                          |                |                                       |                |      |
| 62 | 828 | Creek J A standard terminology for occupational therapy Br. J. Occup. Ther. 2006; 69(5): 202-208                                                                                                                                         | CT      | Not applicable           | As example     | Other/multiple/unknown/not applicable | United Kingdom | 2006 |
| 63 | 714 | Currie LM Informatics and quality improvement/assurance. Nursing leadership (Toronto, Ont.) 2011 Apr; 24(1): 19-22                                                                                                                       | CT      | Not applicable           | As example     | Nursing                               | Canada         | 2011 |
| 64 | 830 | de Lusignan S, Teasdale S Achieving benefit for patients in primary care informatics: The report of a international consensus workshop at Medinfo 2007 Informatics Prim. Care 2007; 15(4): 255-261                                       | CT      | Not applicable           | As example     | Primary care                          | United Kingdom | 2007 |
| 65 | 875 | Demir OM, Appleby R, Wang Y, Logan RPH What factors might contribute to borderline faecal calprotectin levels? J. Crohn's Colitis 2012; 6: S56                                                                                           | CT      | Not applicable           | As example     | Other/multiple/unknown/not applicable | United Kingdom | 2012 |
| 66 | 256 | Dougherty M, Mitchell S Getting better data from the MDS. Improving diagnostic data reporting in long-term care facilities. Journal of AHIMA / American Health Information Management Association 2004 Nov-Dec; 75(10): 28-33; quiz 35-6 | CT      | Not applicable           | As example     | Nursing                               | United States  | 2004 |

| No | Id  | Reference                                                                                                                                                                                                                                                                                                                                                                                             | Version | SNOMED CT Focus Category | Usage Category | Domain                                | Country        | Year |
|----|-----|-------------------------------------------------------------------------------------------------------------------------------------------------------------------------------------------------------------------------------------------------------------------------------------------------------------------------------------------------------------------------------------------------------|---------|--------------------------|----------------|---------------------------------------|----------------|------|
| 67 | 529 | Foulis P.R., Haley J.A. Standardization of bioinformatics. Annals of Clinical and Laboratory Science 2009; 39: 210-                                                                                                                                                                                                                                                                                   | CT      | Not applicable           | As example     | Other/multiple/unknown/not applicable | United States  | 2009 |
| 68 | 351 | Franklin RC, Béland MJ, Krogmann ON, Mapping and coding of nomenclatures for paediatric and congenital heart disease. Cardiology in the young 2006 Apr; 16(2): 105-6                                                                                                                                                                                                                                  | CT      | Not applicable           | As example     | Cardiology                            | Unknown        | 2006 |
| 69 | 478 | Franklin RC, Jacobs JP, Krogmann ON, Béland MJ, Aiello VD, Colan SD, Elliott MJ, William Gaynor J, Kurosawa H, Maruszewski B, Stellin G, Tchervenkov CI, Walters Iii HL, Weinberg P, Anderson RH Nomenclature for congenital and paediatric cardiac disease: historical perspectives and The International Pediatric and Congenital Cardiac Code. Cardiology in the young 2008 Dec; 18 Suppl 2: 70-80 | CT      | Not applicable           | As example     | Cardiology                            | United Kingdom | 2008 |
| 70 | 780 | García Rojo M State of the art and trends for digital pathology. Studies in health technology and informatics 2012;179:15-28                                                                                                                                                                                                                                                                          | CT      | Not applicable           | As example     | Pathology                             | Spain          | 2012 |
| 71 | 489 | Giannangelo K, Fenton S EHR's effect on the revenue cycle management Coding function. Journal of healthcare information management : JHIM 2008; 22(1): 26-30                                                                                                                                                                                                                                          | CT      | Not applicable           | As example     | Other/multiple/unknown/not applicable | United States  | 2008 |

| No | Id  | Reference                                                                                                                                                                 | Version | SNOMED CT Focus Category | Usage Category | Domain                                | Country       | Year |
|----|-----|---------------------------------------------------------------------------------------------------------------------------------------------------------------------------|---------|--------------------------|----------------|---------------------------------------|---------------|------|
| 72 | 820 | Griffon N, Savoye-Collet C, Massari P, Daniel C, Darmoni SJ An interface terminology for medical imaging ordering purposes. AMIA Annu Symp Proc 2012;2012:1237-43         | CT      | Not applicable           | As example     | Radiology                             | France        | 2012 |
| 73 | 807 | Halper M, Morrey CP, Chen Y, Elhanan G, Hripcsak G, Perl Y Auditing hierarchical cycles to locate other inconsistencies in the UMLS. AMIA Annu Symp Proc 2011;2011:529-36 | CT      | Not applicable           | As example     | Other/multiple/unknown/not applicable | United States | 2011 |
| 74 | 513 | Hammond WE eHealth interoperability. Studies in health technology and informatics 2008; 134: 245-53                                                                       | CT      | Not applicable           | As example     | Other/multiple/unknown/not applicable | United States | 2008 |
| 75 | 670 | Haroske G. Structured reports in tumor pathology-how and why. Virchows Archiv 2010; 457: 140-                                                                             | CT      | Not applicable           | As example     | Pathology                             | Germany       | 2010 |
| 76 | 829 | Haux R, Knaup P, Leiner F On educating about medical data management: The other side of the electronic health record Methods Inf. Med. 2007; 46(1): 74-79                 | CT      | Not applicable           | As example     | Other/multiple/unknown/not applicable | Germany       | 2007 |
| 77 | 410 | Ingenerf J [Terminologies or classifications. What does the future hold?]. Bundesgesundheitsblatt, Gesundheitsforschung, Gesundheitsschutz 2007 Aug; 50(8): 1070-83       | CT      | Not applicable           | As example     | Veterinary                            | Germany       | 2007 |
| 78 | 589 | Kamal J, Liu J, Ostrander M, Santangelo J, Dyta R, Rogers P, Mekhjian HS Information warehouse - a comprehensive informatics                                              | CT      | Not applicable           | As example     | Other/multiple/unknown/not applicable | United States | 2010 |



| No | Id  | Reference                                                                                                                                                                                                  | Version | SNOMED CT Focus Category | Usage Category | Domain                                | Country        | Year |
|----|-----|------------------------------------------------------------------------------------------------------------------------------------------------------------------------------------------------------------|---------|--------------------------|----------------|---------------------------------------|----------------|------|
|    |     | platform for business, clinical, and research applications. AMIA ... Annual Symposium proceedings / AMIA Symposium. AMIA Symposium 2010; 2010: 452-6                                                       |         |                          |                |                                       |                |      |
| 79 | 832 | Kapoor M For the NHS Care Records Service the future's bright, it's SNOMED CT Pharm. J. 2008; 280(7500): 534                                                                                               | CT      | Not applicable           | As example     | Other/multiple/unknown/not applicable | United Kingdom | 2008 |
| 80 | 295 | Kloss L The promise of ICD-10-CM. Health management technology 2005 Jul; 26(7): 48, 47                                                                                                                     | CT      | Not applicable           | As example     | Other/multiple/unknown/not applicable | United States  | 2005 |
| 81 | 693 | Lependu P, Musen MA, Shah NH Enabling enrichment analysis with the Human Disease Ontology. Journal of biomedical informatics 2011 Apr 29;                                                                  | CT      | Not applicable           | As example     | Genetics                              | United States  | 2011 |
| 82 | 683 | Lindblom A, Robinson PN Bioinformatics for human genetics: promises and challenges. Human mutation 2011 May; 32(5): 495-500                                                                                | CT      | Not applicable           | As example     | Genetics                              | Sweden         | 2011 |
| 83 | 565 | Lloyd D, Tang P, Clark J, Hesketh J, Paget A, Baker B Capturing nursing information in the United Kingdom through use of a conceptual model. Studies in health technology and informatics 2009; 146: 683-7 | CT      | Not applicable           | As example     | Nursing                               | United Kingdom | 2009 |
| 84 | 403 | Long W Lessons extracting diseases from discharge summaries. AMIA ... Annual Symposium proceedings / AMIA Symposium. AMIA                                                                                  | CT      | Not applicable           | As example     | Other/multiple/unknown/not applicable | United States  | 2007 |

| No | Id  | Reference                                                                                                                                                                                                              | Version | SNOMED CT Focus Category | Usage Category | Domain                                | Country        | Year |
|----|-----|------------------------------------------------------------------------------------------------------------------------------------------------------------------------------------------------------------------------|---------|--------------------------|----------------|---------------------------------------|----------------|------|
|    |     | Symposium 2007; : 478-82                                                                                                                                                                                               |         |                          |                |                                       |                |      |
| 85 | 526 | Lowe HJ, Ferris TA, Hernandez PM, Weber SC STRIDE--An integrated standards-based translational research informatics platform. AMIA ... Annual Symposium proceedings / AMIA Symposium. AMIA Symposium 2009; 2009: 391-5 | CT      | Not applicable           | As example     | Other/multiple/unknown/not applicable | United States  | 2009 |
| 86 | 835 | Madden A Health informatics and the importance of coding Anaesth. Intensive Care Med. 2010; 11(12): 500-501                                                                                                            | CT      | Not applicable           | As example     | Primary care                          | United Kingdom | 2010 |
| 87 | 839 | Madden AP, Barham C Clinical systems Anaesth. Intensive Care Med. 2007; 8(12): 518-519                                                                                                                                 | CT      | Not applicable           | As example     | Other/multiple/unknown/not applicable | United Kingdom | 2007 |
| 88 | 323 | Marwede D, Fielding M The epistemological-ontological divide in clinical radiology. Studies in health technology and informatics 2005; 116: 749-54                                                                     | CT      | Not applicable           | As example     | Radiology                             | Germany        | 2005 |
| 89 | 733 | Menárguez-Tortosa M, Fernández-Breis JT Validation of the openEHR archetype library by using OWL reasoning. Studies in health technology and informatics 2011;169:789-93                                               | CT      | Not applicable           | As example     | Other/multiple/unknown/not applicable | Spain          | 2011 |
| 90 | 236 | Morrissey J A defining moment. Database to help establish universally accepted clinical terminology, easing development of a                                                                                           | CT      | Not applicable           | As example     | Other/multiple/unknown/not applicable | United States  | 2003 |

| No | Id  | Reference                                                                                                                                                                                                                                                            | Version | SNOMED CT Focus Category | Usage Category | Domain                                | Country        | Year |
|----|-----|----------------------------------------------------------------------------------------------------------------------------------------------------------------------------------------------------------------------------------------------------------------------|---------|--------------------------|----------------|---------------------------------------|----------------|------|
|    |     | standardized medical record. Modern healthcare 2003 Jul 28; 33(30): 30, 32                                                                                                                                                                                           |         |                          |                |                                       |                |      |
| 91 | 408 | Natale DA, Arighi CN, Barker WC, Blake J, Chang TC, Hu Z, Liu H, Smith B, Wu CH<br>Framework for a protein ontology. BMC bioinformatics 2007; 8 Suppl 9: S1                                                                                                          | CT      | Not applicable           | As example     | Other/multiple/unknown/not applicable | United States  | 2007 |
| 92 | 856 | Northey L, Bhardwaj G, Curran S, McGirr J<br>Epidemiology of eye trauma presenting to a regional hospital emergency department and ophthalmology service Clin. Exp. Ophthalmol. 2012; 40: 79                                                                         | CT      | Not applicable           | As example     | Ophthalmology                         | United States  | 2012 |
| 93 | 266 | Parker CG, Rocha RA, Campbell JR, Tu SW, Huff SM<br>Detailed clinical models for sharable, executable guidelines. Studies in health technology and informatics 2004; 107(Pt 1): 145-8                                                                                | CT      | Not applicable           | As example     | Other/multiple/unknown/not applicable | United States  | 2004 |
| 94 | 556 | Pathak J, Solbrig HR, Buntrock JD, Johnson TM, Chute CG<br>LexGrid: a framework for representing, storing, and querying biomedical terminologies from simple to sublime. Journal of the American Medical Informatics Association : JAMIA 2009 May-Jun; 16(3): 305-15 | CT      | Not applicable           | As example     | Other/multiple/unknown/not applicable | United States  | 2009 |
| 95 | 843 | Pugliano L, Fumagalli D, Irrthum A, Schenk B, Saini KS, Dolci SM, Arahmani A, Piccart MJ, Bucur A                                                                                                                                                                    | CT      | Not applicable           | As example     | Cancer                                | United Kingdom | 2011 |

| No | Id  | Reference                                                                                                                                                                                                                                                                                | Version | SNOMED CT Focus Category | Usage Category | Domain                                | Country            | Year |
|----|-----|------------------------------------------------------------------------------------------------------------------------------------------------------------------------------------------------------------------------------------------------------------------------------------------|---------|--------------------------|----------------|---------------------------------------|--------------------|------|
|    |     | Integrate: A new model in collaborative breast cancer research Breast 2011; 20: S26-S27                                                                                                                                                                                                  |         |                          |                |                                       |                    |      |
| 96 | 368 | Rhodes H Managing data content. Clinical data management programs improve reimbursement. Journal of AHIMA / American Health Information Management Association 2006 Feb; 77(2): 62-3, 72                                                                                                 | CT      | Not applicable           | As example     | Other/multiple/unknown/not applicable | United States      | 2006 |
| 97 | 578 | Rodrigues JM, Kumar A, Bousquet C, Trombert B Using the CEN/ISO standard for categorial structure to harmonise the development of WHO international terminologies. Studies in health technology and informatics 2009; 150: 255-9                                                         | CT      | Not applicable           | As example     | Other/multiple/unknown/not applicable | France             | 2009 |
| 98 | 434 | Rodrigues JM, Rosse C, Fogelberg M, Kumar A, Paviot BT A road from health care classifications and coding systems to biomedical ontology: the CEN categorial structure for terminologies of human anatomy: Catanat. Studies in health technology and informatics 2007; 129(Pt 1): 735-40 | CT      | Not applicable           | As example     | Other/multiple/unknown/not applicable | Multiple countries | 2007 |
| 99 | 861 | Rodriguez-Gonzalez A, Hernandez-Chan G, Colomo-Palacios R, Gomez-Berbis JM, Garcia-Crespo A, Alor-Hernandez G, Valencia-Garcia R Towards an ontology to support                                                                                                                          | CT      | Not applicable           | As example     | Other/multiple/unknown/not applicable | United States      | 2012 |

| No  | Id  | Reference                                                                                                                                                                                                                                         | Version | SNOMED CT Focus Category | Usage Category | Domain                                | Country            | Year |
|-----|-----|---------------------------------------------------------------------------------------------------------------------------------------------------------------------------------------------------------------------------------------------------|---------|--------------------------|----------------|---------------------------------------|--------------------|------|
|     |     | Semantics enabled diagnostic decision support systems Curr. Bioinform. 2012; 7(3): 234-245                                                                                                                                                        |         |                          |                |                                       |                    |      |
| 100 | 291 | Roemer LK, Richardson SJ, Sward K, Tilley C Redundancy in a computer-generated order list: meeting the needs of nurses at various levels of practice expertise. Computers, informatics, nursing : CIN 2005 Mar-Apr; 23(2): 73-82; quiz 83-4       | CT      | Not applicable           | As example     | Nursing                               | United States      | 2005 |
| 101 | 534 | Röhrig R, Rütth R [Intelligent telemedicine in intensive care units. Bed-side operation of medical technology devices and IT in intensive care medicine]. Bundesgesundheitsblatt, Gesundheitsforschung, Gesundheitsschutz 2009 Mar; 52(3): 279-86 | CT      | Not applicable           | As example     | Other/multiple/unknown/not applicable | Germany            | 2009 |
| 102 | 845 | Rojo MG Standardization efforts of digital pathology in Europe Anal. Cell. Pathol. 2011; 34(4): 172-173                                                                                                                                           | CT      | Not applicable           | As example     | Pathology                             | Multiple countries | 2011 |
| 103 | 677 | Rojo MG, Castro AM, Gonçalves L COST Action "EuroTelepath": digital pathology integration in electronic health record, including primary care centres. Diagnostic pathology 2011; 6 Suppl 1: S6                                                   | CT      | Not applicable           | As example     | Pathology                             | Spain              | 2011 |
| 104 | 810 | Rosenbloom ST, Shultz E, Wright A Managing the flood of codes: maintaining patient problem lists in the                                                                                                                                           | CT      | Not applicable           | As example     | Problem list / diagnoses              | United States      | 2012 |

| No  | Id  | Reference                                                                                                                                        | Version | SNOMED CT Focus Category | Usage Category | Domain                                | Country       | Year |
|-----|-----|--------------------------------------------------------------------------------------------------------------------------------------------------|---------|--------------------------|----------------|---------------------------------------|---------------|------|
|     |     | era of Meaningful Use and ICD10. AMIA Annu Symp Proc 2012;2012:8-10                                                                              |         |                          |                |                                       |               |      |
| 105 | 582 | Rosendal M, Falkø E [Diagnostic classification in Denmark with emphasis on general practice]. Ugeskrift for læger 2009 Mar 16; 171(12): 997-1000 | CT      | Not applicable           | As example     | Primary care                          | Denmark       | 2009 |
| 106 | 249 | Runy LA IT standards. Speaking a common language. Hospitals & health networks / AHA 2004 Feb; 78(2): 63-8, 2                                     | CT      | Not applicable           | As example     | Other/multiple/unknown/not applicable | Unknown       | 2004 |
| 107 | 320 | Sim I, Detmer DE Beyond trial registration: a global trial bank for clinical trial reporting. PLoS medicine 2005 Nov; 2(11): e365                | CT      | Not applicable           | As example     | Drugs                                 | United States | 2005 |
| 108 | 316 | Slee VN, Slee D, Schmidt HJ The tyranny of the diagnosis code. North Carolina medical journal 2005 Sep-Oct; 66(5): 331-7                         | CT      | Not applicable           | As example     | Other/multiple/unknown/not applicable | United States | 2005 |
| 109 | 287 | Sullivan F, Wyatt JC How computers help make efficient use of consultations. BMJ (Clinical research ed.) 2005 Oct 29; 331(7523): 1010-2          | CT      | Not applicable           | As example     | Other/multiple/unknown/not applicable | United States | 2005 |
| 110 | 314 | Wallace S Mean what you say. Before achieving IT interoperability, leaders must agree on a definition. Modern healthcare 2005 Mar 21; 35(12): 22 | CT      | Not applicable           | As example     | Other/multiple/unknown/not applicable | United States | 2005 |
| 111 | 793 | Wang L, Wang J, Wang M, Li Y, Liang Y, Xu D Using Internet search engines to obtain medical information: a comparative study. Journal            | CT      | Not applicable           | As example     | Cancer                                | China         | 2012 |

| No  | Id  | Reference                                                                                                                                                                                                                                                                                                    | Version | SNOMED CT Focus Category | Usage Category | Domain                                | Country        | Year |
|-----|-----|--------------------------------------------------------------------------------------------------------------------------------------------------------------------------------------------------------------------------------------------------------------------------------------------------------------|---------|--------------------------|----------------|---------------------------------------|----------------|------|
|     |     | of medical Internet research<br>2012 May 16;14(3):e74                                                                                                                                                                                                                                                        |         |                          |                |                                       |                |      |
| 112 | 701 | White JM, Kalendarian E, Stark PC, Ramoni RL, Vaderhobli R, Walji MF<br>Evaluating a dental diagnostic terminology in an electronic health record.<br>Journal of dental education<br>2011 May; 75(5): 605-15                                                                                                 | CT      | Not applicable           | As example     | Dentistry                             | United States  | 2011 |
| 113 | 490 | Wilson ML, Windle PE, Krenzischek DA, Clifford TL<br>Perianesthesia data elements: from concept, to validation, to operations.<br>Journal of perianesthesia nursing : official journal of the American Society of PeriAnesthesia Nurses / American Society of PeriAnesthesia Nurses 2008 Jun; 23(3): 198-203 | CT      | Not applicable           | As example     | Nursing                               | United States  | 2008 |
| 114 | 735 | de Lusignan S<br>SNOMED is coming, and more about using and interacting with technology in primary care.<br>Informatics in primary care<br>2011;19(1):1-2                                                                                                                                                    | CT      | Not applicable           | Letter         | Other/multiple/unknown/not applicable | United Kingdom | 2011 |
| 115 | 301 | Jenders RA<br>Classification of psychiatric disorders. JAMA : the journal of the American Medical Association 2005 Oct 19; 294(15): 1899; author reply 1899-900                                                                                                                                              | CT      | Not applicable           | Letter         | Other/multiple/unknown/not applicable | Unknown        | 2005 |
| 116 | 253 | Moore H<br>Getting the SNOMED ball rolling in Australia. Journal of AHIMA / American Health Information Management Association 2004 Nov-Dec; 75(10): 6                                                                                                                                                       | CT      | Not applicable           | Letter         | Other/multiple/unknown/not applicable | Australia      | 2004 |

| No  | Id  | Reference                                                                                                                                                                                                                                                  | Version | SNOMED CT Focus Category | Usage Category      | Domain                                | Country            | Year |
|-----|-----|------------------------------------------------------------------------------------------------------------------------------------------------------------------------------------------------------------------------------------------------------------|---------|--------------------------|---------------------|---------------------------------------|--------------------|------|
| 117 | 860 | Nguyen A, Sun YK, Sitbon L, Geva S Representation of assertions in clinical free-text using SNOMED CT Australas. Med. J. 2012; 5(9): 472-474                                                                                                               | CT      | Not applicable           | Letter              | Other/multiple/unknown/not applicable | Australia          | 2012 |
| 118 | 836 | Rajeev D, Staes CJ, Evans RS, Mortice S, Rolfs R, Samore MH, Whitney J, Kurzban R, Huff SM In response to letter to the editor: 'Concerning SNOMED-CT content for public health case reports' J. Am. Med. Informatics Assoc. 2010; 17(5): 613-614          | CT      | Not applicable           | Letter              | Other/multiple/unknown/not applicable | Multiple countries | 2010 |
| 119 | 821 | Rector A AIM: A personal view of where I have been and where we might be going Artif. Intell. Med. 2001; 23(1): 111-127                                                                                                                                    | CT      | Not applicable           | Letter              | Other/multiple/unknown/not applicable | United Kingdom     | 2001 |
| 120 | 772 | Roumier J, Jamouille M, Stichele RV, Romary L, Cardillo E Towards a terminologies support system in primary care. Informatics in primary care 2011;19(4):257-8                                                                                             | CT      | Not applicable           | Letter              | Primary care                          | United Kingdom     | 2012 |
| 121 | 630 | Wilcke JR, Green JM, Spackman KA, Martin MK, Case JT, Santamaria SL, Zimmerman K Concerning SNOMED-CT content for public health case reports. Journal of the American Medical Informatics Association : JAMIA 2010 Sep-Oct; 17(5): 613; author reply 613-4 | CT      | Not applicable           | Letter              | Other/multiple/unknown/not applicable | United States      | 2010 |
| 122 | 676 | Ahmadian L, Cornet R, VAN Klei WA, DE Keizer NF Data collection variation in                                                                                                                                                                               | CT      | Not applicable           | Reviews and surveys | Preoperative                          | Netherlands        | 2011 |



| No  | Id  | Reference                                                                                                                                                                                            | Version  | SNOMED CT Focus Category | Usage Category      | Domain                                | Country            | Year |
|-----|-----|------------------------------------------------------------------------------------------------------------------------------------------------------------------------------------------------------|----------|--------------------------|---------------------|---------------------------------------|--------------------|------|
|     |     | preoperative assessment: a literature review. Computers, informatics, nursing : CIN 2011 Nov; 29(11): 662-70                                                                                         |          |                          |                     |                                       |                    |      |
| 123 | 511 | Ahmadian L, Cornet R, van Klei WA, de Keizer NF Diversity in preoperative-assessment data collection, a literature review. Studies in health technology and informatics 2008; 136: 127-32            | CT       | Not applicable           | Reviews and surveys | Preoperative                          | Netherlands        | 2008 |
| 124 | 313 | Arts DG, Cornet R, de Jonge E, de Keizer NF Methods for evaluation of medical terminological systems -- a literature review and a case study. Methods of information in medicine 2005; 44(5): 616-25 | Multiple | Not applicable           | Reviews and surveys | Other/multiple/unknown/not applicable | Netherlands        | 2005 |
| 125 | 473 | Cornet R, de Keizer N Forty years of SNOMED: a literature review. BMC medical informatics and decision making 2008; 8 Suppl 1: S2                                                                    | Multiple | Not applicable           | Reviews and surveys | Other/multiple/unknown/not applicable | Multiple countries | 2008 |
| 126 | 792 | Cornet R, Van Eldik A, De Keizer N Inventory of tools for dutch clinical language processing. Studies in health technology and informatics 2012;180:245-9                                            | CT       | Not applicable           | Reviews and surveys | Other/multiple/unknown/not applicable | Netherlands        | 2012 |
| 127 | 585 | Elhanan G, Perl Y, Geller J A Survey of Direct Users and Uses of SNOMED CT: 2010 Status. AMIA ... Annual Symposium proceedings / AMIA Symposium. AMIA Symposium 2010; 2010: 207-11                   | CT       | Not applicable           | Reviews and surveys | Other/multiple/unknown/not applicable | United States      | 2010 |

| No  | Id  | Reference                                                                                                                                                                                                                | Version | SNOMED CT Focus Category | Usage Category               | Domain                                | Country            | Year |
|-----|-----|--------------------------------------------------------------------------------------------------------------------------------------------------------------------------------------------------------------------------|---------|--------------------------|------------------------------|---------------------------------------|--------------------|------|
| 128 | 705 | Elhanan G, Perl Y, Geller J A survey of SNOMED CT direct users, 2010: impressions and preferences regarding content and quality. Journal of the American Medical Informatics Association : JAMIA 2011 Aug 11;            | CT      | Not applicable           | Reviews and surveys          | Other/multiple/unknown/not applicable | Multiple countries | 2011 |
| 129 | 500 | Giannangelo K, Fenton SH SNOMED CT survey: an assessment of implementation in EMR/EHR applications. Perspectives in health information management / AHIMA, American Health Information Management Association 2008; 5: 7 | CT      | Not applicable           | Reviews and surveys          | Other/multiple/unknown/not applicable | United States      | 2008 |
| 130 | 774 | Lee D, Cornet R, Lau F, de Keizer N A survey of SNOMED CT implementations. Journal of biomedical informatics 2012 Oct 3;                                                                                                 | CT      | Not applicable           | Reviews and surveys          | Other/multiple/unknown/not applicable | Multiple countries | 2012 |
| 131 | 819 | Adamusiak T, Bodenreider O Quality assurance in LOINC using Description Logic. AMIA Annu Symp Proc 2012;2012:1099-108                                                                                                    | CT      | Pre-development          | Compare to/map with other TS | Laboratory                            | United States      | 2012 |
| 132 | 468 | Alecu I, Bousquet C, Jaulent MC A case report: using SNOMED CT for grouping Adverse Drug Reactions Terms. BMC medical informatics and decision making 2008; 8 Suppl 1: S4                                                | CT      | Pre-development          | Compare to/map with other TS | Drugs                                 | France             | 2008 |
| 133 | 391 | Alecu I, Bousquet C, Mouglin F, Jaulent MC Mapping of the WHO-ART terminology on Snomed CT to improve grouping of related adverse                                                                                        | CT      | Pre-development          | Compare to/map with other TS | Drugs                                 | France             | 2006 |

| No  | Id  | Reference                                                                                                                                                                                                                                                                 | Version  | SNOMED CT Focus Category | Usage Category               | Domain         | Country        | Year |
|-----|-----|---------------------------------------------------------------------------------------------------------------------------------------------------------------------------------------------------------------------------------------------------------------------------|----------|--------------------------|------------------------------|----------------|----------------|------|
|     |     | drug reactions. Studies in health technology and informatics 2006; 124: 833-8                                                                                                                                                                                             |          |                          |                              |                |                |      |
| 134 | 643 | Bakhshi-Raiez F, Ahmadian L, Cornet R, de Jonge E, de Keizer NF Construction of an interface terminology on SNOMED CT. Generic approach and its application in intensive care. Methods of information in medicine 2010; 49(4): 349-59                                     | CT       | Pre-development          | Compare to/map with other TS | Intensive care | Netherlands    | 2010 |
| 135 | 664 | Bakhshi-Raiez F, Cornet R, Bosman RJ, Joore H, de Keizer NF Using SNOMED CT to identify a crossmap between two classification systems: a comparison with an expert-based and a data-driven strategy. Studies in health technology and informatics 2010; 160(Pt 2): 1035-9 | CT       | Pre-development          | Compare to/map with other TS | Intensive care | Netherlands    | 2010 |
| 136 | 509 | Bakhshi-Raiez F, Cornet R, de Keizer NF Cross-mapping APACHE IV "reasons for intensive care admission" classification to SNOMED CT. Studies in health technology and informatics 2008; 136: 779-84                                                                        | CT       | Pre-development          | Compare to/map with other TS | Intensive care | Netherlands    | 2008 |
| 137 | 189 | Bakken S, Warren J, Lundberg C, Casey A, Correia C, Konicek D, Zingo C An evaluation of the utility of the CEN categorical structure for nursing diagnoses as a terminology model for integrating nursing diagnosis concepts into SNOMED. Studies in                      | Multiple | Pre-development          | Compare to/map with other TS | Nursing        | United Kingdom | 2001 |

| No  | Id  | Reference                                                                                                                                                                                                                                                                        | Version | SNOMED CT Focus Category | Usage Category               | Domain     | Country       | Year |
|-----|-----|----------------------------------------------------------------------------------------------------------------------------------------------------------------------------------------------------------------------------------------------------------------------------------|---------|--------------------------|------------------------------|------------|---------------|------|
|     |     | health technology and informatics 2001; 84(Pt 1): 151-5                                                                                                                                                                                                                          |         |                          |                              |            |               |      |
| 138 | 195 | Bakken S, Warren JJ, Lundberg C, Casey A, Correia C, Konicek D, Zingo C An evaluation of the usefulness of two terminology models for integrating nursing diagnosis concepts into SNOMED Clinical Terms. International journal of medical informatics 2002 Dec 18; 68(1-3): 71-7 | CT      | Pre-development          | Compare to/map with other TS | Nursing    | United States | 2002 |
| 139 | 243 | Berman JJ Tumor taxonomy for the developmental lineage classification of neoplasms. BMC cancer 2004 Nov 30; 4: 88                                                                                                                                                                | CT      | Pre-development          | Compare to/map with other TS | Cancer     | United States | 2004 |
| 140 | 457 | Bodenreider O Issues in mapping LOINC laboratory tests to SNOMED CT. AMIA ... Annual Symposium proceedings / AMIA Symposium. AMIA Symposium 2008; : 51-5                                                                                                                         | CT      | Pre-development          | Compare to/map with other TS | Laboratory | United States | 2008 |
| 141 | 528 | Bodenreider O Using SNOMED CT in combination with MedDRA for reporting signal detection and adverse drug reactions reporting. AMIA ... Annual Symposium proceedings / AMIA Symposium. AMIA Symposium 2009; 2009: 45-9                                                            | CT      | Pre-development          | Compare to/map with other TS | Drugs      | United States | 2009 |
| 142 | 333 | Bodenreider O, Zhang S Comparing the representation of anatomy in the FMA and SNOMED CT.                                                                                                                                                                                         | CT      | Pre-development          | Compare to/map with other TS | Anatomy    | United States | 2006 |

| No  | Id  | Reference                                                                                                                                                                                                                                                              | Version | SNOMED CT Focus Category | Usage Category               | Domain                                | Country       | Year |
|-----|-----|------------------------------------------------------------------------------------------------------------------------------------------------------------------------------------------------------------------------------------------------------------------------|---------|--------------------------|------------------------------|---------------------------------------|---------------|------|
|     |     | AMIA ... Annual Symposium proceedings / AMIA Symposium. AMIA Symposium 2006; : 46-50                                                                                                                                                                                   |         |                          |                              |                                       |               |      |
| 143 | 572 | Bousquet C, Gasperina P, Trombert B, Clavel L, Kumar A, Rodrigues JM Ontological representation of adverse drug reactions using the Foundational Model of Anatomy. Studies in health technology and informatics 2009; 150: 507-11                                      | CT      | Pre-development          | Compare to/map with other TS | Drugs                                 | France        | 2009 |
| 144 | 303 | Bowman S Coordinating SNOMED-CT and ICD-10. Journal of AHIMA / American Health Information Management Association 2005 Jul-Aug; 76(7): 60-1                                                                                                                            | CT      | Pre-development          | Compare to/map with other TS | Other/multiple/unknown/not applicable | United States | 2005 |
| 145 | 226 | Brouch K AHIMA project offers insights into SNOMED, ICD-9-CM mapping process. Journal of AHIMA / American Health Information Management Association 2003 Jul-Aug; 74(7): 52-5                                                                                          | CT      | Pre-development          | Compare to/map with other TS | Other/multiple/unknown/not applicable | United States | 2003 |
| 146 | 450 | Brown SH, Husser CS, Wahner-Roedler D, Bailey S, Nugent L, Porter K, Bauer BA, Elkin PL Using SNOMED CT as a reference terminology to cross map two highly pre-coordinated classification systems. Studies in health technology and informatics 2007; 129(Pt 1): 636-9 | CT      | Pre-development          | Compare to/map with other TS | Problem list / diagnoses              | United States | 2007 |
| 147 | 461 | Burton MM, Simonaitis L, Schadow G Medication and                                                                                                                                                                                                                      | CT      | Pre-development          | Compare to/map with other TS | Problem list / diagnoses              | United States | 2008 |

| No  | Id  | Reference                                                                                                                                                                                                                       | Version | SNOMED CT Focus Category | Usage Category               | Domain                                | Country       | Year |
|-----|-----|---------------------------------------------------------------------------------------------------------------------------------------------------------------------------------------------------------------------------------|---------|--------------------------|------------------------------|---------------------------------------|---------------|------|
|     |     | indication linkage: A practical therapy for the problem list? AMIA ... Annual Symposium proceedings / AMIA Symposium. AMIA Symposium 2008; : 86-90                                                                              |         |                          |                              |                                       |               |      |
| 148 | 214 | Cantor MN, Lussier YA<br>Putting data integration into practice: using biomedical terminologies to add structure to existing data sources. AMIA ... Annual Symposium proceedings / AMIA Symposium. AMIA Symposium 2003; : 125-9 | CT      | Pre-development          | Compare to/map with other TS | Genetics                              | United States | 2003 |
| 149 | 806 | Dykes PC, DaDamio RR, Goldsmith D, Kim HE, Ohashi K, Saba VK<br>Leveraging standards to support patient-centric interdisciplinary plans of care. AMIA Annu Symp Proc 2011;2011:356-63                                           | CT      | Pre-development          | Compare to/map with other TS | Nursing                               | United States | 2011 |
| 150 | 284 | Fung KW, Bodenreider O<br>Utilizing the UMLS for semantic mapping between terminologies. AMIA ... Annual Symposium proceedings / AMIA Symposium. AMIA Symposium 2005; : 266-70                                                  | CT      | Pre-development          | Compare to/map with other TS | Other/multiple/unknown/not applicable | United States | 2005 |
| 151 | 438 | Fung KW, Bodenreider O, Aronson AR, Hole WT, Srinivasan S<br>Combining lexical and semantic methods of inter-terminology mapping using the UMLS. Studies in health technology and informatics 2007; 129(Pt 1): 605-9            | CT      | Pre-development          | Compare to/map with other TS | Problem list / diagnoses              | United States | 2007 |

| No  | Id  | Reference                                                                                                                                                                                                                                                          | Version  | SNOMED CT Focus Category | Usage Category               | Domain                                | Country        | Year |
|-----|-----|--------------------------------------------------------------------------------------------------------------------------------------------------------------------------------------------------------------------------------------------------------------------|----------|--------------------------|------------------------------|---------------------------------------|----------------|------|
| 152 | 309 | Fung KW, Hole WT, Nelson SJ, Srinivasan S, Powell T, Roth L Integrating SNOMED CT into the UMLS: an exploration of different views of synonymy and quality of editing. Journal of the American Medical Informatics Association : JAMIA 2005 Jul-Aug; 12(4): 486-94 | CT       | Pre-development          | Compare to/map with other TS | Other/multiple/unknown/not applicable | United States  | 2005 |
| 153 | 811 | Fung KW, Xu J Synergism between the mapping projects from SNOMED CT to ICD-10 and ICD-10-CM. AMIA Annu Symp Proc 2012;2012:218-27                                                                                                                                  | CT       | Pre-development          | Compare to/map with other TS | Other/multiple/unknown/not applicable | United States  | 2012 |
| 154 | 755 | Giannangelo K, Millar J Mapping SNOMED CT to ICD-10. Studies in health technology and informatics 2012;180:83-7                                                                                                                                                    | CT       | Pre-development          | Compare to/map with other TS | Problem list / diagnoses              | United States  | 2012 |
| 155 | 324 | Goldberg LJ, Ceusters W, Eisner J, Smith B The Significance of SNODENT. Studies in health technology and informatics 2005; 116: 737-42                                                                                                                             | CT       | Pre-development          | Compare to/map with other TS | Dentistry                             | United States  | 2005 |
| 156 | 656 | Grabar N, Hamon T Exploitation of linguistic indicators for automatic weighting of synonyms induced within three biomedical terminologies. Studies in health technology and informatics 2010; 160(Pt 2): 1015-9                                                    | Multiple | Pre-development          | Compare to/map with other TS | Other/multiple/unknown/not applicable | France         | 2010 |
| 157 | 341 | Hardiker NR, Casey A, Coenen A, Konicek D Mutual enhancement of diverse terminologies. AMIA ...                                                                                                                                                                    | CT       | Pre-development          | Compare to/map with other TS | Nursing                               | United Kingdom | 2006 |

| No  | Id  | Reference                                                                                                                                                                                                                                 | Version | SNOMED CT Focus Category | Usage Category               | Domain                                | Country       | Year |
|-----|-----|-------------------------------------------------------------------------------------------------------------------------------------------------------------------------------------------------------------------------------------------|---------|--------------------------|------------------------------|---------------------------------------|---------------|------|
|     |     | Annual Symposium proceedings / AMIA Symposium. AMIA Symposium 2006; : 319-23                                                                                                                                                              |         |                          |                              |                                       |               |      |
| 158 | 813 | Harman TL, Seeley RA, Oliveira IM, Sheide A, Kartchner T, Woolstenhulme RD, Wilson PS, Lau LM, Matney SA<br>Standardized mapping of nursing assessments across 59 U.S. military treatment facilities. AMIA Annu Symp Proc 2012;2012:331-9 | CT      | Pre-development          | Compare to/map with other TS | Nursing                               | United States | 2012 |
| 159 | 594 | Hogan WR, Slee VN<br>Measuring the Information Gain of Diagnosis vs. Diagnosis Category Coding. AMIA ... Annual Symposium proceedings / AMIA Symposium. AMIA Symposium 2010; 2010: 306-10                                                 | CT      | Pre-development          | Compare to/map with other TS | Other/multiple/unknown/not applicable | United States | 2010 |
| 160 | 197 | Imel M A closer look: the SNOMED clinical terms to ICD-9-CM mapping. Journal of AHIMA / American Health Information Management Association 2002 Jun; 73(6): 66-9; quiz 71-2                                                               | CT      | Pre-development          | Compare to/map with other TS | Other/multiple/unknown/not applicable | United States | 2002 |
| 161 | 339 | Jacobs AK, Quinn TA, Nelson SJ<br>Mapping SNOMED-CT concepts to MeSH concepts. AMIA ... Annual Symposium proceedings / AMIA Symposium. AMIA Symposium 2006; : 965                                                                         | CT      | Pre-development          | Compare to/map with other TS | Other/multiple/unknown/not applicable | United States | 2006 |
| 162 | 566 | Jalent MC, Alecu I<br>Evaluation of an ontological resource for pharmacovigilance. Studies                                                                                                                                                | CT      | Pre-development          | Compare to/map with other TS | Drugs                                 | France        | 2009 |



| No  | Id  | Reference                                                                                                                                                                                                                     | Version | SNOMED CT Focus Category | Usage Category               | Domain                                | Country            | Year |
|-----|-----|-------------------------------------------------------------------------------------------------------------------------------------------------------------------------------------------------------------------------------|---------|--------------------------|------------------------------|---------------------------------------|--------------------|------|
|     |     | in health technology and informatics 2009; 150: 522-6                                                                                                                                                                         |         |                          |                              |                                       |                    |      |
| 163 | 702 | Kalenderian E, Ramoni RL, White JM, Schoonheim-Klein ME, Stark PC, Kimmes NS, Zeller GG, Willis GP, Walji MF The development of a dental diagnostic terminology. Journal of dental education 2011 Jan; 75(1): 68-76           | CT      | Pre-development          | Compare to/map with other TS | Dentistry                             | Multiple countries | 2011 |
| 164 | 612 | Kim SY, Kim HH, Lee IK, Kim HS, Cho H Proposed Algorithm with Standard Terminologies (SNOMED and CPT) for Automated Generation of Medical Bills for Laboratory Tests. Healthcare informatics research 2010 Sep; 16(3): 185-90 | CT      | Pre-development          | Compare to/map with other TS | Laboratory                            | South Korea        | 2010 |
| 165 | 697 | Kim TY, Coenen A, Hardiker N Semantic mappings and locality of nursing diagnostic concepts in UMLS. Journal of biomedical informatics 2011 Sep 18;                                                                            | CT      | Pre-development          | Compare to/map with other TS | Nursing                               | United States      | 2011 |
| 166 | 245 | Kumar A, Smith B, Novotny DD Biomedical informatics and granularity. Comparative and functional genomics 2004; 5(6-7): 501-8                                                                                                  | CT      | Pre-development          | Compare to/map with other TS | Other/multiple/unknown/not applicable | United States      | 2004 |
| 167 | 561 | Le H.V., Beach K.J. Advantages of mapping ICD-9-CM into SNOMED CT concepts and hierarchy. Pharmacoepidemiology and Drug Safety (PDS) 2009; 18: S33-S34                                                                        | CT      | Pre-development          | Compare to/map with other TS | Problem list / diagnoses              | United States      | 2009 |

| No  | Id  | Reference                                                                                                                                                                                                                                                              | Version | SNOMED CT Focus Category | Usage Category               | Domain            | Country        | Year |
|-----|-----|------------------------------------------------------------------------------------------------------------------------------------------------------------------------------------------------------------------------------------------------------------------------|---------|--------------------------|------------------------------|-------------------|----------------|------|
| 168 | 648 | Le H.V., Beach K.J. Automated robust mapping GPRD medical diagnosis read codes to SNOMED CT for OMOP project. <i>Pharmacoepidemiology and Drug Safety</i> 2010; 19: S106-                                                                                              | CT      | Pre-development          | Compare to/map with other TS | Drugs             | United Kingdom | 2010 |
| 169 | 211 | Li W, Tolson J, Horan TC Creating public health standard vocabularies: mapping a set of CDC's pathogen codes to SNOMED concepts. <i>AMIA ... Annual Symposium proceedings / AMIA Symposium. AMIA Symposium 2003</i> ; : 907                                            | CT      | Pre-development          | Compare to/map with other TS | Internal medicine | United States  | 2003 |
| 170 | 352 | Lu DF, Eichmann D, Konicek D, Park HT, Ucharattana P, Delaney C Standardized nursing language in the systematized nomenclature of medicine clinical terms: A cross-mapping validation method. <i>Computers, informatics, nursing : CIN</i> 2006 Sep-Oct; 24(5): 288-96 | CT      | Pre-development          | Compare to/map with other TS | Nursing           | United States  | 2006 |
| 171 | 416 | Lu DF, Park HT, Ucharattana P, Konicek D, Delaney C Nursing outcomes classification in the systematized nomenclature of medicine clinical terms: a cross-mapping validation. <i>Computers, informatics, nursing : CIN</i> 2007 May-Jun; 25(3): 159-70                  | CT      | Pre-development          | Compare to/map with other TS | Nursing           | United States  | 2007 |
| 172 | 261 | Lussier YA, Li J Terminological mapping for high throughput comparative biology of phenotypes. <i>Pacific Symposium on</i>                                                                                                                                             | CT      | Pre-development          | Compare to/map with other TS | Biology           | United States  | 2004 |

| No  | Id  | Reference                                                                                                                                                                                                                                                                                                                                                            | Version | SNOMED CT Focus Category | Usage Category               | Domain                                | Country       | Year |
|-----|-----|----------------------------------------------------------------------------------------------------------------------------------------------------------------------------------------------------------------------------------------------------------------------------------------------------------------------------------------------------------------------|---------|--------------------------|------------------------------|---------------------------------------|---------------|------|
|     |     | Biocomputing. Pacific Symposium on Biocomputing 2004; : 202-13                                                                                                                                                                                                                                                                                                       |         |                          |                              |                                       |               |      |
| 173 | 419 | Marquet G, Mosser J, Burgun A A method exploiting syntactic patterns and the UMLS semantics for aligning biomedical ontologies: the case of OBO disease ontologies. International journal of medical informatics 2007 Dec; 76 Suppl 3: S353-61                                                                                                                       | CT      | Pre-development          | Compare to/map with other TS | Pathology                             | France        | 2007 |
| 174 | 574 | Merabti T, Letord C, Abdoune H, Lecroq T, Joubert M, Darmoni SJ Projection and inheritance of SNOMED CT relations between MeSH terms. Studies in health technology and informatics 2009; 150: 233-7                                                                                                                                                                  | CT      | Pre-development          | Compare to/map with other TS | Other/multiple/unknown/not applicable | France        | 2009 |
| 175 | 729 | Montella D, Brown SH, Elkin PL, Jackson JC, Rosenbloom ST, Wahner-Roedler D, Welsh G, Cotton B, Guillaumondegui OD, Lew H, Taber KH, Tupler LA, Vanderploeg R, Speroff T Comparison of SNOMED CT versus Medcin terminology concept coverage for mild Traumatic Brain Injury. AMIA ... Annual Symposium proceedings / AMIA Symposium. AMIA Symposium 2011;2011:969-78 | CT      | Pre-development          | Compare to/map with other TS | Internal medicine                     | United States | 2011 |
| 176 | 634 | Nadkarni PM, Darer JA Migrating existing clinical content from ICD-9 to                                                                                                                                                                                                                                                                                              | CT      | Pre-development          | Compare to/map with other TS | Other/multiple/unknown/not applicable | United States | 2010 |

| No  | Id  | Reference                                                                                                                                                                                   | Version | SNOMED CT Focus Category | Usage Category               | Domain       | Country        | Year |
|-----|-----|---------------------------------------------------------------------------------------------------------------------------------------------------------------------------------------------|---------|--------------------------|------------------------------|--------------|----------------|------|
|     |     | SNOMED. Journal of the American Medical Informatics Association : JAMIA 2010 Sep-Oct; 17(5): 602-7                                                                                          |         |                          |                              |              |                |      |
| 177 | 602 | Nadkarni PM, Darer JD Determining correspondences between high-frequency MedDRA concepts and SNOMED: a case study. BMC medical informatics and decision making 2010; 10: 66                 | CT      | Pre-development          | Compare to/map with other TS | Drugs        | United States  | 2010 |
| 178 | 281 | Nash S Integrating Osteopathic terminology into SNOMED CT. AMIA ... Annual Symposium proceedings / AMIA Symposium. AMIA Symposium 2005; : 1061                                              | CT      | Pre-development          | Compare to/map with other TS | Osteopathy   | United States  | 2005 |
| 179 | 666 | Nyström M, Vikström A, Nilsson G, Orman H, Ahlfeldt H Visualization of disease distribution with SNOMED CT and ICD-10. Studies in health technology and informatics 2010; 160(Pt 2): 1100-3 | CT      | Pre-development          | Compare to/map with other TS | Primary care | United Kingdom | 2010 |
| 180 | 623 | Nyström M, Vikström A, Nilsson GH, Ahlfeldt H, Orman H Enriching a primary health care version of ICD-10 using SNOMED CT mapping. Journal of biomedical semantics 2010; 1(1): 7             | CT      | Pre-development          | Compare to/map with other TS | Primary care | Sweden         | 2010 |
| 181 | 712 | Park HA, Lundberg C, Coenen A, Konicek D Evaluation of the content coverage of SNOMED CT representing ICNP seven-                                                                           | CT      | Pre-development          | Compare to/map with other TS | Nursing      | United States  | 2011 |

| No  | Id  | Reference                                                                                                                                                                                                                                      | Version | SNOMED CT Focus Category | Usage Category               | Domain                                | Country            | Year |
|-----|-----|------------------------------------------------------------------------------------------------------------------------------------------------------------------------------------------------------------------------------------------------|---------|--------------------------|------------------------------|---------------------------------------|--------------------|------|
|     |     | axis version 1 concepts. Methods of information in medicine 2011; 50(5): 472-8                                                                                                                                                                 |         |                          |                              |                                       |                    |      |
| 182 | 661 | Park HA, Lundberg C, Coenen A, Konicek D Mapping ICNP Version 1 concepts to SNOMED CT. Studies in health technology and informatics 2010; 160(Pt 2): 1109-13                                                                                   | CT      | Pre-development          | Compare to/map with other TS | Nursing                               | South Korea        | 2010 |
| 183 | 567 | Park HA, Lundberg CB, Coenen A, Konicek DJ Evaluation of the content coverage of SNOMED-CT to represent ICNP Version 1 catalogues. Studies in health technology and informatics 2009; 146: 303-7                                               | CT      | Pre-development          | Compare to/map with other TS | Nursing                               | South Korea        | 2009 |
| 184 | 415 | Park HT, Lu DF, Konicek D, Delaney C Nursing interventions classification in systematized nomenclature of medicine clinical terms: a cross-mapping validation. Computers, informatics, nursing : CIN 2007 Jul-Aug; 25(4): 198-208; quiz 209-10 | CT      | Pre-development          | Compare to/map with other TS | Nursing                               | United States      | 2007 |
| 185 | 435 | Patel CO, Cimino JJ A scale-free network view of the UMLS to learn terminology translations. Studies in health technology and informatics 2007; 129(Pt 1): 689-93                                                                              | CT      | Pre-development          | Compare to/map with other TS | Problem list / diagnoses              | United States      | 2007 |
| 186 | 776 | Rath A, Olry A, Dhombres F, Brandt MM, Urbero B, Ayme S Representation of rare diseases in health information systems: the                                                                                                                     | CT      | Pre-development          | Compare to/map with other TS | Other/multiple/unknown/not applicable | Multiple countries | 2012 |

| No  | Id  | Reference                                                                                                                                                                                                                                 | Version | SNOMED CT Focus Category | Usage Category               | Domain                                | Country        | Year |
|-----|-----|-------------------------------------------------------------------------------------------------------------------------------------------------------------------------------------------------------------------------------------------|---------|--------------------------|------------------------------|---------------------------------------|----------------|------|
|     |     | Orphanet approach to serve a wide range of end users. Human mutation 2012 May;33(5):803-8                                                                                                                                                 |         |                          |                              |                                       |                |      |
| 187 | 754 | Reich C, Ryan PB, Stang PE, Rocca M Evaluation of alternative standardized terminologies for medical conditions within a network of observational healthcare databases. Journal of biomedical informatics 2012 Aug;45(4):689-96           | CT      | Pre-development          | Compare to/map with other TS | Other/multiple/unknown/not applicable | United States  | 2012 |
| 188 | 480 | Richesson RL, Fung KW, Krischer JP Heterogeneous but "standard" coding systems for adverse events: Issues in achieving interoperability between apples and oranges. Contemporary clinical trials 2008 Sep; 29(5): 635-45                  | CT      | Pre-development          | Compare to/map with other TS | Drugs                                 | United States  | 2008 |
| 189 | 397 | Robinson J, de Lusignan S, Kostkova P, Madge B Using UMLS to map from a library to a clinical classification: Improving the functionality of a digital library. Studies in health technology and informatics 2006; 121: 86-95             | CT      | Pre-development          | Compare to/map with other TS | Other/multiple/unknown/not applicable | United Kingdom | 2006 |
| 190 | 557 | Rosenbloom ST, Brown SH, Froehling D, Bauer BA, Wahner-Roedler DL, Gregg WM, Elkin PL Using SNOMED CT to represent two interface terminologies. Journal of the American Medical Informatics Association : JAMIA 2009 Jan-Feb; 16(1): 81-8 | CT      | Pre-development          | Compare to/map with other TS | Other/multiple/unknown/not applicable | United States  | 2009 |

| No  | Id  | Reference                                                                                                                                                                                                                 | Version | SNOMED CT Focus Category | Usage Category               | Domain                   | Country       | Year |
|-----|-----|---------------------------------------------------------------------------------------------------------------------------------------------------------------------------------------------------------------------------|---------|--------------------------|------------------------------|--------------------------|---------------|------|
| 191 | 746 | Saitwal H, Qing D, Jones S, Bernstam EV, Chute CG, Johnson TR Cross-terminology mapping challenges: a demonstration using medication terminological systems. Journal of biomedical informatics 2012 Aug;45(4):613-25      | CT      | Pre-development          | Compare to/map with other TS | Drugs                    | United States | 2012 |
| 192 | 802 | Sarntivijai S, Xiang Z, Shedden KA, Markel H, Omenn GS, Athey BD, He Y Ontology-based combinatorial comparative analysis of adverse events associated with killed and live influenza vaccines. PLoS One 2012;7(11):e49941 | CT      | Pre-development          | Compare to/map with other TS | Drugs                    | United States | 2012 |
| 193 | 681 | So EY, Park HA Exploring the Possibility of Information Sharing between the Medical and Nursing Domains by Mapping Medical Records to SNOMED CT and ICNP. Healthcare informatics research 2011 Sep; 17(3): 156-61         | CT      | Pre-development          | Compare to/map with other TS | Gastroenterology         | South Korea   | 2011 |
| 194 | 787 | Steindel SJ A comparison between a SNOMED CT problem list and the ICD-10-CM/PCS HIPAA code sets. Perspectives in health information management / AHIMA, American Health Information Management Association 2012;9:1b      | CT      | Pre-development          | Compare to/map with other TS | Problem list / diagnoses | United States | 2012 |
| 195 | 336 | Torres-Urquidy MH, Schleyer T Evaluation of the Systematized Nomenclature of Dentistry using case                                                                                                                         | CT      | Pre-development          | Compare to/map with other TS | Dentistry                | United States | 2006 |

| No  | Id  | Reference                                                                                                                                                                                                                                                               | Version | SNOMED CT Focus Category | Usage Category               | Domain                                | Country            | Year |
|-----|-----|-------------------------------------------------------------------------------------------------------------------------------------------------------------------------------------------------------------------------------------------------------------------------|---------|--------------------------|------------------------------|---------------------------------------|--------------------|------|
|     |     | reports: preliminary results. AMIA ... Annual Symposium proceedings / AMIA Symposium. AMIA Symposium 2006; : 1124                                                                                                                                                       |         |                          |                              |                                       |                    |      |
| 196 | 786 | Uribe GA, López DM, Blobel B Architectural analysis of clinical ontologies for pHealth interoperability. Studies in health technology and informatics 2012;177:176-82                                                                                                   | CT      | Pre-development          | Compare to/map with other TS | Other/multiple/unknown/not applicable | Multiple countries | 2012 |
| 197 | 615 | Vikström A, Nyström M, Ahlfeldt H, Strender LE, Nilsson GH Views of diagnosis distribution in primary care in 2.5 million encounters in Stockholm: a comparison between ICD-10 and SNOMED CT. Informatics in primary care 2010; 18(1): 17-29                            | CT      | Pre-development          | Compare to/map with other TS | Primary care                          | Sweden             | 2010 |
| 198 | 409 | Vikström A, Skånér Y, Strender LE, Nilsson GH Mapping the categories of the Swedish primary health care version of ICD-10 to SNOMED CT concepts: rule development and intercoder reliability in a mapping trial. BMC medical informatics and decision making 2007; 7: 9 | CT      | Pre-development          | Compare to/map with other TS | Primary care                          | Sweden             | 2007 |
| 199 | 265 | Wang X, Quek HN, Cantor M, Kra P, Schultz A, Lussier YA Automating terminological networks to link heterogeneous biomedical databases. Studies in health technology and informatics 2004; 107(Pt 1): 555-9                                                              | CT      | Pre-development          | Compare to/map with other TS | Other/multiple/unknown/not applicable | United States      | 2004 |



| No  | Id  | Reference                                                                                                                                                                                                                                             | Version | SNOMED CT Focus Category | Usage Category               | Domain                                | Country       | Year |
|-----|-----|-------------------------------------------------------------------------------------------------------------------------------------------------------------------------------------------------------------------------------------------------------|---------|--------------------------|------------------------------|---------------------------------------|---------------|------|
| 200 | 469 | Wang Y, Patrick J, Miller G, O'Hallaran J A<br>computational linguistics motivated mapping of ICPC-2 PLUS to SNOMED CT. BMC medical informatics and decision making 2008; 8 Suppl 1: S5                                                               | CT      | Pre-development          | Compare to/map with other TS | Primary care                          | Australia     | 2008 |
| 201 | 732 | Warden GI, Lacson R, Khorasani R Leveraging terminologies for retrieval of radiology reports with critical imaging findings. AMIA ... Annual Symposium proceedings / AMIA Symposium. AMIA Symposium 2011;2011:1481-8                                  | CT      | Pre-development          | Compare to/map with other TS | Radiology                             | United States | 2011 |
| 202 | 467 | Westra BL, Bauman R, Delaney CW, Lundberg CB, Petersen C Validation of concept mapping between PND5 and SNOMED CT. AORN journal 2008 Jun; 87(6): 1217-29                                                                                              | CT      | Pre-development          | Compare to/map with other TS | Nursing                               | United States | 2008 |
| 203 | 758 | Wu ST, Liu H, Li D, Tao C, Musen MA, Chute CG, Shah NH Unified Medical Language System term occurrences in clinical notes: a large-scale corpus analysis. Journal of the American Medical Informatics Association : JAMIA 2012 Jun 1;19(e1):e149-e156 | CT      | Pre-development          | Compare to/map with other TS | Problem list / diagnoses              | United States | 2012 |
| 204 | 818 | Xu J, Fung KW Handling age specification in the SNOMED CT to ICD-10-CM cross-map. AMIA Annu Symp Proc 2012;2012:1014-22                                                                                                                               | CT      | Pre-development          | Compare to/map with other TS | Other/multiple/unknown/not applicable | United States | 2012 |

| No  | Id  | Reference                                                                                                                                                                                                                       | Version  | SNOMED CT Focus Category | Usage Category        | Domain                                | Country       | Year |
|-----|-----|---------------------------------------------------------------------------------------------------------------------------------------------------------------------------------------------------------------------------------|----------|--------------------------|-----------------------|---------------------------------------|---------------|------|
| 205 | 297 | Berman JJ Nomenclature-based data retrieval without prior annotation: facilitating biomedical data integration with fast doublet matching. In silico biology 2005; 5(3): 313-22                                                 | CT       | Pre-development          | Design considerations | Other/multiple/unknown/not applicable | United States | 2005 |
| 206 | 731 | Ceusters W SNOMED CT revisions and coded data repositories: when to upgrade? AMIA ... Annual Symposium proceedings / AMIA Symposium. AMIA Symposium 2011;2011:197-206                                                           | CT       | Pre-development          | Design considerations | Cancer                                | United States | 2011 |
| 207 | 775 | Cruanes J, Romá-Ferri MT, Lloret E Measuring lexical similarity methods for textual mapping in nursing diagnoses in Spanish and SNOMED-CT. Studies in health technology and informatics 2012;180:255-9                          | CT       | Pre-development          | Design considerations | Nursing                               | Spain         | 2012 |
| 208 | 652 | Cuggia M, Bayat S, Garcelon N, Sanders L, Rouget F, Coursin A, Pladys P A full-text information retrieval system for an epidemiological registry. Studies in health technology and informatics 2010; 160(Pt 1): 491-5           | Multiple | Pre-development          | Design considerations | Paediatrics                           | France        | 2010 |
| 209 | 568 | Daniel C, Buemi A, Mazuel L, Ouagne D, Charlet J Functional requirements of terminology services for coupling interface terminologies to reference terminologies. Studies in health technology and informatics 2009; 150: 205-9 | Multiple | Pre-development          | Design considerations | Hospital                              | France        | 2009 |

| No  | Id  | Reference                                                                                                                                                                                                                                                                | Version | SNOMED CT Focus Category | Usage Category        | Domain                                | Country            | Year |
|-----|-----|--------------------------------------------------------------------------------------------------------------------------------------------------------------------------------------------------------------------------------------------------------------------------|---------|--------------------------|-----------------------|---------------------------------------|--------------------|------|
| 210 | 743 | de Lusignan S, Chan T, Jones S Large complex terminologies: more coding choice, but harder to find data--reflections on introduction of SNOMED CT (Systematized Nomenclature of Medicine--Clinical Terms) as an NHS standard. Informatics in primary care 2011;19(1):3-5 | CT      | Pre-development          | Design considerations | Primary care                          | United Kingdom     | 2011 |
| 211 | 748 | Dinh D, Tamine L, Boubekeur F Factors affecting the effectiveness of biomedical document indexing and retrieval based on terminologies. Artificial intelligence in medicine 2012 Oct 20;                                                                                 | CT      | Pre-development          | Design considerations | Other/multiple/unknown/not applicable | Multiple countries | 2012 |
| 212 | 621 | Dolin RH SNOMED at the point of service: the challenges and opportunities of SNOMED-encoded data. Journal of AHIMA / American Health Information Management Association 2010 Mar; 81(3): 42-3                                                                            | CT      | Pre-development          | Design considerations | Other/multiple/unknown/not applicable | United States      | 2010 |
| 213 | 204 | Dolin RH, Spackman KA, Markwell D Selective retrieval of pre- and post-coordinated SNOMED concepts. Proceedings / AMIA ... Annual Symposium. AMIA Symposium 2002; : 210-4                                                                                                | CT      | Pre-development          | Design considerations | Other/multiple/unknown/not applicable | United States      | 2002 |
| 214 | 741 | Fung KW, Xu J, Rosenbloom ST, Mohr D, Maram N, Suther T Testing Three Problem List Terminologies in a simulated data entry                                                                                                                                               | CT      | Pre-development          | Design considerations | Problem list / diagnoses              | United States      | 2011 |

| No  | Id  | Reference                                                                                                                                                                                                                                                     | Version | SNOMED CT Focus Category | Usage Category        | Domain                    | Country            | Year |
|-----|-----|---------------------------------------------------------------------------------------------------------------------------------------------------------------------------------------------------------------------------------------------------------------|---------|--------------------------|-----------------------|---------------------------|--------------------|------|
|     |     | environment. AMIA ... Annual Symposium proceedings / AMIA Symposium. AMIA Symposium 2011;2011:445-54                                                                                                                                                          |         |                          |                       |                           |                    |      |
| 215 | 727 | Garcia Rojo M., Laurinavicius A., Punys V., Gehring S. Encoding pathology diagnosis with SNOMED CT: Feasibility of migration from SNOMED II to SNOMED CT. Virchows Archiv 2011; 459: S309-                                                                    | CT      | Pre-development          | Design considerations | Pathology                 | Multiple countries | 2011 |
| 216 | 369 | Green JM, Wilcke JR, Abbott J, Rees LP Development and evaluation of methods for structured recording of heart murmur findings using SNOMED-CT post-coordination. Journal of the American Medical Informatics Association : JAMIA 2006 May-Jun; 13(3): 321-33 | CT      | Pre-development          | Design considerations | Cardiology                | Unknown            | 2006 |
| 217 | 338 | Handler J, Feied C, Smith M, Gillam M Improving a UMLS based allergy list for use in live electronic medical record systems. AMIA ... Annual Symposium proceedings / AMIA Symposium. AMIA Symposium 2006; : 942                                               | CT      | Pre-development          | Design considerations | Allergies                 | United States      | 2006 |
| 218 | 726 | Hansen DP, Kemp ML, Mills SR, Mercer MA, Frosdick PA, Lawley MJ Developing a national emergency department data reference set based on SNOMED CT. The Medical journal of Australia 2011 Feb 21;                                                               | CT      | Pre-development          | Design considerations | Emergency department/room | Australia          | 2011 |

| No  | Id  | Reference                                                                                                                                                                                                | Version | SNOMED CT Focus Category | Usage Category        | Domain                                | Country        | Year |
|-----|-----|----------------------------------------------------------------------------------------------------------------------------------------------------------------------------------------------------------|---------|--------------------------|-----------------------|---------------------------------------|----------------|------|
|     |     | 194(4): S8-10                                                                                                                                                                                            |         |                          |                       |                                       |                |      |
| 219 | 418 | Herbert I CLICSIG report: issues around compositional terminologies, SNOMED-CT in particular. Informatics in primary care 2007; 15(3): 193-7                                                             | CT      | Pre-development          | Design considerations | Other/multiple/unknown/not applicable | Unknown        | 2007 |
| 220 | 298 | Herbert I, Hawking M Bringing SNOMED-CT into use within primary care. Informatics in primary care 2005; 13(1): 61-4                                                                                      | CT      | Pre-development          | Design considerations | Primary care                          | United Kingdom | 2005 |
| 221 | 506 | Ingenerf J, Beisiegel T A version management system for SNOMED CT. Studies in health technology and informatics 2008; 136: 827-32                                                                        | CT      | Pre-development          | Design considerations | Other/multiple/unknown/not applicable | Germany        | 2008 |
| 222 | 599 | Jarman J, Berndt DJ Throw the bath water out, keep the baby: keeping medically-relevant terms for text mining. AMIA ... Annual Symposium proceedings / AMIA Symposium. AMIA Symposium 2010; 2010: 336-40 | CT      | Pre-development          | Design considerations | Hospital                              | United States  | 2010 |
| 223 | 514 | Kanter AS, Wang AY, Masarie FE, Naeymi-Rad F, Safran C Interface terminologies: bridging the gap between theory and reality for Africa. Studies in health technology and informatics 2008; 136: 27-32    | CT      | Pre-development          | Design considerations | Other/multiple/unknown/not applicable | Africa         | 2008 |
| 224 | 326 | Kemp M, Walker S, Scott P Coding of thoughts, words and things. The HIM journal 2005; 34(2): 54-6                                                                                                        | CT      | Pre-development          | Design considerations | Other/multiple/unknown/not applicable | Australia      | 2005 |
| 225 | 750 | Kokkinakis D Semantic                                                                                                                                                                                    | CT      | Pre-development          | Design considerations | Other/multiple/unknown                | Sweden         | 2012 |

| No  | Id  | Reference                                                                                                                                                                                                     | Version | SNOMED CT Focus Category | Usage Category        | Domain                                | Country       | Year |
|-----|-----|---------------------------------------------------------------------------------------------------------------------------------------------------------------------------------------------------------------|---------|--------------------------|-----------------------|---------------------------------------|---------------|------|
|     |     | Relations of Binary Compounds Annotated with SNOMED CT. Studies in health technology and informatics 2012;180:169-73                                                                                          |         |                          |                       | n/not applicable                      |               |      |
| 226 | 687 | Lee D, Cornet R, Lau F Implications of SNOMED CT versioning. International journal of medical informatics 2011 Jun; 80(6): 442-53                                                                             | CT      | Pre-development          | Design considerations | Problem list / diagnoses              | Canada        | 2011 |
| 227 | 601 | Lee DH, Lau FY, Quan H A method for encoding clinical datasets with SNOMED CT. BMC medical informatics and decision making 2010; 10: 53                                                                       | CT      | Pre-development          | Design considerations | Palliative care                       | Canada        | 2010 |
| 228 | 784 | Leroux H, McBride S, Lefort L, Kemp M, Gibson S A method for the semantic enrichment of clinical trial data. Studies in health technology and informatics 2012;178:111-6                                      | CT      | Pre-development          | Design considerations | Other/multiple/unknown/not applicable | Australia     | 2012 |
| 229 | 216 | Lieberman MI, Ricciardi TN, Masarie FE, Spackman KA The use of SNOMED CT simplifies querying of a clinical data warehouse. AMIA ... Annual Symposium proceedings / AMIA Symposium. AMIA Symposium 2003; : 910 | CT      | Pre-development          | Design considerations | Cardiology                            | United States | 2003 |
| 230 | 778 | López-García P, Boeker M, Illarramendi A, Schulz S Usability-driven pruning of large ontologies: the case of SNOMED CT. Journal of the American Medical Informatics Association :                             | CT      | Pre-development          | Design considerations | Cardiology                            | Spain         | 2012 |

| No  | Id  | Reference                                                                                                                                                                                                                                      | Version | SNOMED CT Focus Category | Usage Category        | Domain                                | Country       | Year |
|-----|-----|------------------------------------------------------------------------------------------------------------------------------------------------------------------------------------------------------------------------------------------------|---------|--------------------------|-----------------------|---------------------------------------|---------------|------|
|     |     | JAMIA 2012 Jun 1;19(e1):e102-e109                                                                                                                                                                                                              |         |                          |                       |                                       |               |      |
| 231 | 593 | Mougins F, Bodenreider O, Burgun A Looking for Anemia (and Other Disorders) in SNOMED CT: Comparison of Three Approaches and Practical Implications. AMIA ... Annual Symposium proceedings / AMIA Symposium. AMIA Symposium 2010; 2010: 527-31 | CT      | Pre-development          | Design considerations | Internal medicine                     | France        | 2010 |
| 232 | 445 | Nachimuthu SK, Lau LM Practical issues in using SNOMED CT as a reference terminology. Studies in health technology and informatics 2007; 129(Pt 1): 640-4                                                                                      | CT      | Pre-development          | Design considerations | Other/multiple/unknown/not applicable | United States | 2007 |
| 233 | 337 | Nachimuthu SK, Woolstenhulme RD Generalizability of hybrid search algorithms to map multiple biomedical vocabulary domains. AMIA ... Annual Symposium proceedings / AMIA Symposium. AMIA Symposium 2006; : 1042                                | CT      | Pre-development          | Design considerations | Other/multiple/unknown/not applicable | United States | 2006 |
| 234 | 633 | Nadkarni PM, Marengo LA Implementing description-logic rules for SNOMED-CT attributes through a table-driven approach. Journal of the American Medical Informatics Association : JAMIA 2010 Mar-Apr; 17(2): 182-4                              | CT      | Pre-development          | Design considerations | Other/multiple/unknown/not applicable | United States | 2010 |
| 235 | 657 | Navas H, Lopez Osornio A, Gambarte L, Elías                                                                                                                                                                                                    | CT      | Pre-development          | Design considerations | Other/multiple/unknown/not applicable | Argentina     | 2010 |

| No  | Id  | Reference                                                                                                                                                                                                                                                                                                                          | Version | SNOMED CT Focus Category | Usage Category        | Domain                                | Country        | Year |
|-----|-----|------------------------------------------------------------------------------------------------------------------------------------------------------------------------------------------------------------------------------------------------------------------------------------------------------------------------------------|---------|--------------------------|-----------------------|---------------------------------------|----------------|------|
|     |     | Leguizamón G, Wasserman S, Orrego N, Luna D, de Quirós FG Implementing rules to improve the quality of concept post-coordination with SNOMED CT. Studies in health technology and informatics 2010; 160(Pt 2): 1045-9                                                                                                              |         |                          |                       |                                       |                |      |
| 236 | 340 | Patel CO, Cimino JJ Mining cross-terminology links in the UMLS. AMIA ... Annual Symposium proceedings / AMIA Symposium. AMIA Symposium 2006; : 624-8                                                                                                                                                                               | CT      | Pre-development          | Design considerations | Other/multiple/unknown/not applicable | United States  | 2006 |
| 237 | 502 | Pathak J, Jiang G, Dwarkanath SO, Buntrock JD, Chute CG Adopting Graph Traversal Techniques for Context-Driven Value Sets Extraction from Biomedical Knowledge Sources. Proceedings / IEEE International Conference on Semantic Computing ... ICSC. IEEE International Conference on Semantic Computing 2008 Aug 12; 2008: 460-467 | CT      | Pre-development          | Design considerations | Other/multiple/unknown/not applicable | United States  | 2008 |
| 238 | 458 | Pathak J, Jiang G, Dwarkanath SO, Buntrock JD, Chute CG, Chute C LexValueSets: an approach for context-driven value sets extraction. AMIA ... Annual Symposium proceedings / AMIA Symposium. AMIA Symposium 2008; : 556-60                                                                                                         | CT      | Pre-development          | Design considerations | Other/multiple/unknown/not applicable | United Kingdom | 2008 |
| 239 | 629 | Patrick J, Li M High accuracy information extraction of medication information from clinical notes: 2009                                                                                                                                                                                                                           | CT      | Pre-development          | Design considerations | Other/multiple/unknown/not applicable | Australia      | 2010 |



| No  | Id  | Reference                                                                                                                                                                                                                                | Version | SNOMED CT Focus Category | Usage Category        | Domain                                | Country       | Year |
|-----|-----|------------------------------------------------------------------------------------------------------------------------------------------------------------------------------------------------------------------------------------------|---------|--------------------------|-----------------------|---------------------------------------|---------------|------|
|     |     | i2b2 medication extraction challenge. Journal of the American Medical Informatics Association : JAMIA 2010 Sep-Oct; 17(5): 524-7                                                                                                         |         |                          |                       |                                       |               |      |
| 240 | 766 | Randorff Højen A, Rosenbeck Gøeg K SNOMED CT Implementation. Mapping Guidelines Facilitating Reuse of Data. Methods of information in medicine 2012 Oct 1;51(6)                                                                          | CT      | Pre-development          | Design considerations | Other/multiple/unknown/not applicable | Denmark       | 2012 |
| 241 | 571 | Randorff Rasmussen A, Markussen D Methods for testing SNOMED CT in a defined clinical domain. Studies in health technology and informatics 2009; 150: 248                                                                                | CT      | Pre-development          | Design considerations | Pathology                             | Denmark       | 2009 |
| 242 | 722 | Rasmussen AR, Rosenbeck K SNOMED CT implementation: implications of choosing clinical findings or observable entities. Studies in health technology and informatics 2011; 169: 809-13                                                    | CT      | Pre-development          | Design considerations | SNOMED CT Hierarchy                   | Denmark       | 2011 |
| 243 | 669 | Rojo M.G. SNOMED CT in Europe. Virchows Archiv 2010; 457: 140-                                                                                                                                                                           | CT      | Pre-development          | Design considerations | Pathology                             | Spain         | 2010 |
| 244 | 370 | Rosenbloom ST, Miller RA, Johnson KB, Elkin PL, Brown SH Interface terminologies: facilitating direct entry of clinical data into electronic health record systems. Journal of the American Medical Informatics Association : JAMIA 2006 | CT      | Pre-development          | Design considerations | Other/multiple/unknown/not applicable | United States | 2006 |

| No  | Id  | Reference                                                                                                                                                                                                 | Version | SNOMED CT Focus Category | Usage Category        | Domain                                | Country       | Year |
|-----|-----|-----------------------------------------------------------------------------------------------------------------------------------------------------------------------------------------------------------|---------|--------------------------|-----------------------|---------------------------------------|---------------|------|
|     |     | May-Jun; 13(3): 277-88                                                                                                                                                                                    |         |                          |                       |                                       |               |      |
| 245 | 596 | Sevenster M, Aleksovski Z<br>SNOMED CT Saves Keystrokes: Quantifying Semantic Autocompletion. AMIA ... Annual Symposium proceedings / AMIA Symposium. AMIA Symposium 2010; 2010: 742-6                    | CT      | Pre-development          | Design considerations | Other/multiple/unknown/not applicable | Netherlands   | 2010 |
| 246 | 690 | Sevenster M, van Ommering R, Qian Y<br>Algorithmic and user study of an autocompletion algorithm on a large medical vocabulary. Journal of biomedical informatics 2011 Oct 11;                            | CT      | Pre-development          | Design considerations | Other/multiple/unknown/not applicable | Netherlands   | 2011 |
| 247 | 564 | Stenzhorn H, Pacheco EJ, Nohama P, Schulz S<br>Automatic mapping of clinical documentation to SNOMED CT. Studies in health technology and informatics 2009; 150: 228-32                                   | CT      | Pre-development          | Design considerations | Cardiology                            | Germany       | 2009 |
| 248 | 547 | Wade G, Rosenbloom ST<br>The impact of SNOMED CT revisions on a mapped interface terminology: terminology development and implementation issues. Journal of biomedical informatics 2009 Jun; 42(3): 490-3 | CT      | Pre-development          | Design considerations | Other/multiple/unknown/not applicable | United States | 2009 |
| 249 | 584 | Wei WQ, Tao C, Jiang G, Chute CG<br>A high throughput semantic concept frequency based approach for patient identification: a case study using type 2 diabetes                                            | CT      | Pre-development          | Design considerations | Other/multiple/unknown/not applicable | United States | 2010 |

| No  | Id  | Reference                                                                                                                                                                                                                                              | Version | SNOMED CT Focus Category | Usage Category               | Domain                   | Country       | Year |
|-----|-----|--------------------------------------------------------------------------------------------------------------------------------------------------------------------------------------------------------------------------------------------------------|---------|--------------------------|------------------------------|--------------------------|---------------|------|
|     |     | mellitus clinical notes. AMIA ... Annual Symposium proceedings / AMIA Symposium. AMIA Symposium 2010; 2010: 857-61                                                                                                                                     |         |                          |                              |                          |               |      |
| 250 | 739 | Wright A, Feblowitz J, McCoy AB, Sittig DF Comparative analysis of the VA/Kaiser and NLM CORE problem subsets: an empirical study based on problem frequency. AMIA ... Annual Symposium proceedings / AMIA Symposium. AMIA Symposium 2011;2011:1532-40 | CT      | Pre-development          | Design considerations        | Problem list / diagnoses | United States | 2011 |
| 251 | 622 | Ahmadian L, Cornet R, de Keizer NF Facilitating pre-operative assessment guidelines representation using SNOMED CT. Journal of biomedical informatics 2010 Dec; 43(6): 883-90                                                                          | CT      | Pre-development          | Prospective content coverage | Preoperative             | Netherlands   | 2010 |
| 252 | 576 | Ahmadian L, De Keizer NF, Cornet R The use of SNOMED CT for representing concepts used in preoperative guidelines. Studies in health technology and informatics 2009; 150: 658-62                                                                      | CT      | Pre-development          | Prospective content coverage | Preoperative             | Netherlands   | 2009 |
| 253 | 590 | Bodenreider O, Fushman DD Investigating drug classes in biomedical terminologies from the perspective of clinical decision support. AMIA ... Annual Symposium proceedings / AMIA Symposium. AMIA Symposium 2010; 2010: 56-                             | CT      | Pre-development          | Prospective content coverage | Drugs                    | United States | 2010 |

| No  | Id  | Reference                                                                                                                                                                                                                                                                                                               | Version | SNOMED CT Focus Category | Usage Category               | Domain                   | Country       | Year |
|-----|-----|-------------------------------------------------------------------------------------------------------------------------------------------------------------------------------------------------------------------------------------------------------------------------------------------------------------------------|---------|--------------------------|------------------------------|--------------------------|---------------|------|
|     |     | 60                                                                                                                                                                                                                                                                                                                      |         |                          |                              |                          |               |      |
| 254 | 210 | Brown SH, Bauer BA, Wahner-Roedler DL, Elkin PL Coverage of oncology drug indication concepts and compositional semantics by SNOMED-CT. AMIA ... Annual Symposium proceedings / AMIA Symposium. AMIA Symposium 2003; : 115-9                                                                                            | CT      | Pre-development          | Prospective content coverage | Drugs                    | United States | 2003 |
| 255 | 346 | Brown SH, Elkin PL, Bauer BA, Wahner-Roedler D, Husser CS, Temesgen Z, Hardenbrook SP, Fielstein EM, Rosenbloom ST SNOMED CT: utility for a general medical evaluation template. AMIA ... Annual Symposium proceedings / AMIA Symposium. AMIA Symposium 2006; : 101-5                                                   | CT      | Pre-development          | Prospective content coverage | Hospital                 | United States | 2006 |
| 256 | 400 | Brown SH, Rosenbloom ST, Bauer BA, Wahner-Roedler D, Froehling DA, Bailey KR, Lincoln MJ, Montella D, Fielstein EM, Elkin PL Direct comparison of MEDCIN and SNOMED CT for representation of a general medical evaluation template. AMIA ... Annual Symposium proceedings / AMIA Symposium. AMIA Symposium 2007; : 75-9 | CT      | Pre-development          | Prospective content coverage | Hospital                 | United States | 2007 |
| 257 | 736 | Campbell JR, Xu J, Fung KW Can SNOMED CT fulfill the vision of a compositional terminology? Analyzing the use case for problem list. AMIA ... Annual Symposium proceedings / AMIA                                                                                                                                       | CT      | Pre-development          | Prospective content coverage | Problem list / diagnoses | United States | 2011 |

| No  | Id  | Reference                                                                                                                                                                                                                                      | Version | SNOMED CT Focus Category | Usage Category               | Domain                                | Country       | Year |
|-----|-----|------------------------------------------------------------------------------------------------------------------------------------------------------------------------------------------------------------------------------------------------|---------|--------------------------|------------------------------|---------------------------------------|---------------|------|
|     |     | Symposium. AMIA Symposium 2011;2011:181-8                                                                                                                                                                                                      |         |                          |                              |                                       |               |      |
| 258 | 318 | Chiang MF, Casper DS, Cimino JJ, Starren J Representation of ophthalmology concepts by electronic systems: adequacy of controlled medical terminologies. Ophthalmology 2005 Feb; 112(2): 175-83                                                | CT      | Pre-development          | Prospective content coverage | Ophthalmology                         | United States | 2005 |
| 259 | 448 | Daniel-Le Bozec C, Steichen O, Dart T, Jaulent MC The role of local terminologies in electronic health records. The HEGP experience. Studies in health technology and informatics 2007; 129(Pt 1): 780-4                                       | CT      | Pre-development          | Prospective content coverage | Other/multiple/unknown/not applicable | France        | 2007 |
| 260 | 675 | De Silva TS, MacDonald D, Paterson G, Sikdar KC, Cochrane B Systematized nomenclature of medicine clinical terms (SNOMED CT) to represent computed tomography procedures. Computer methods and programs in biomedicine 2011 Mar; 101(3): 324-9 | CT      | Pre-development          | Prospective content coverage | Radiology                             | Canada        | 2011 |
| 261 | 335 | Deitzer JR, Payne PR, Starren JB Coverage of clinical trials tasks in existing ontologies. AMIA ... Annual Symposium proceedings / AMIA Symposium. AMIA Symposium 2006; : 903                                                                  | CT      | Pre-development          | Prospective content coverage | Cancer                                | United States | 2006 |
| 262 | 230 | Dykes PC, Currie LM, Cimino JJ Adequacy of evolving national standardized                                                                                                                                                                      | CT      | Pre-development          | Prospective content coverage | Cardiology                            | United States | 2003 |

| No  | Id  | Reference                                                                                                                                                                                                                                                                             | Version | SNOMED CT Focus Category | Usage Category               | Domain                   | Country       | Year |
|-----|-----|---------------------------------------------------------------------------------------------------------------------------------------------------------------------------------------------------------------------------------------------------------------------------------------|---------|--------------------------|------------------------------|--------------------------|---------------|------|
|     |     | terminologies for interdisciplinary coded concepts in an automated clinical pathway. Journal of biomedical informatics 2003 Aug-Oct; 36(4-5): 313-25                                                                                                                                  |         |                          |                              |                          |               |      |
| 263 | 507 | Elkin PL, Brown SH, Balas A, Temesgen Z, Wahner-Roedler D, Froehling D, Liebow M, Trusko B, Rosenbloom ST, Poland G Biosurveillance evaluation of SNOMED CT's terminology (BEST Trial): coverage of chief complaints. Studies in health technology and informatics 2008; 136: 797-802 | CT      | Pre-development          | Prospective content coverage | Problem list / diagnoses | United States | 2008 |
| 264 | 375 | Elkin PL, Brown SH, Husser CS, Bauer BA, Wahner-Roedler D, Rosenbloom ST, Speroff T Evaluation of the content coverage of SNOMED CT: ability of SNOMED clinical terms to represent clinical problem lists. Mayo Clinic proceedings. Mayo Clinic 2006 Jun; 81(6): 741-8                | CT      | Pre-development          | Prospective content coverage | Problem list / diagnoses | United States | 2006 |
| 265 | 663 | Elkin PL, Trusko BE, Koppel R, Speroff T, Mohrer D, Sakji S, Gurewitz I, Tuttle M, Brown SH Secondary use of clinical data. Studies in health technology and informatics 2010; 155: 14-29                                                                                             | CT      | Pre-development          | Prospective content coverage | Problem list / diagnoses | United States | 2010 |
| 266 | 636 | Fung KW, McDonald C, Srinivasan S The UMLS-CORE project: a study of the                                                                                                                                                                                                               | CT      | Pre-development          | Prospective content coverage | Problem list / diagnoses | United States | 2010 |

| No  | Id  | Reference                                                                                                                                                                                                                           | Version | SNOMED CT Focus Category | Usage Category               | Domain       | Country       | Year |
|-----|-----|-------------------------------------------------------------------------------------------------------------------------------------------------------------------------------------------------------------------------------------|---------|--------------------------|------------------------------|--------------|---------------|------|
|     |     | problem list terminologies used in large healthcare institutions. Journal of the American Medical Informatics Association : JAMIA 2010 Nov-Dec; 17(6): 675-80                                                                       |         |                          |                              |              |               |      |
| 267 | 439 | Hrabak KM, Campbell JR, Tu SW, McClure R, Weida RT<br>Creating interoperable guidelines: requirements of vocabulary standards in immunization decision support. Studies in health technology and informatics 2007; 129(Pt 2): 930-4 | CT      | Pre-development          | Prospective content coverage | Primary care | United States | 2007 |
| 268 | 563 | James AG, Ng E, Shah PS, A reference set of SNOMED terms for the structured representation of respiratory disorders of the newborn infant. Studies in health technology and informatics 2009; 150: 243-7                            | CT      | Pre-development          | Prospective content coverage | Newborn      | Canada        | 2009 |
| 269 | 517 | James AG, Spackman KA<br>Representation of disorders of the newborn infant by SNOMED CT. Studies in health technology and informatics 2008; 136: 833-8                                                                              | CT      | Pre-development          | Prospective content coverage | Newborn      | United States | 2008 |
| 270 | 404 | James AG, Spackman KA<br>SNOMED CT as the clinical terminology for the representation of the clinical care of the newborn infant. AMIA ... Annual Symposium proceedings / AMIA Symposium. AMIA Symposium 2007; : 989                | CT      | Pre-development          | Prospective content coverage | Newborn      | United States | 2007 |

| No  | Id  | Reference                                                                                                                                                                                                                                                           | Version | SNOMED CT Focus Category | Usage Category               | Domain                                | Country       | Year |
|-----|-----|---------------------------------------------------------------------------------------------------------------------------------------------------------------------------------------------------------------------------------------------------------------------|---------|--------------------------|------------------------------|---------------------------------------|---------------|------|
| 271 | 387 | Kim H, Harris MR, Savova G, Chute CG Content coverage of SNOMED-CT toward the ICU nursing flowsheets and the acuity indicators. Studies in health technology and informatics 2006; 122: 722-6                                                                       | CT      | Pre-development          | Prospective content coverage | Intensive care                        | United States | 2006 |
| 272 | 460 | Kim HY, Cho IS, Lee JH, Kim JH, Sim DH, Kim Y Matching between the concepts of knowledge representation for a hypertension guideline and SNOMED CT. AMIA ... Annual Symposium proceedings / AMIA Symposium. AMIA Symposium 2008; : 1005                             | CT      | Pre-development          | Prospective content coverage | Other/multiple/unknown/not applicable | South Korea   | 2008 |
| 273 | 725 | Kokkinakis D What is the coverage of SNOMED CT@on scientific medical corpora? Studies in health technology and informatics 2011; 169: 814-8                                                                                                                         | CT      | Pre-development          | Prospective content coverage | Other/multiple/unknown/not applicable | Sweden        | 2011 |
| 274 | 549 | Lathrop SL, Davis WL, Nolte KB Medical terminology coding systems and medicolegal death investigation data: searching for a standardized method of electronic coding at a statewide medical examiner's office. Journal of forensic sciences 2009 Jan; 54(1): 207-11 | CT      | Pre-development          | Prospective content coverage | Other/multiple/unknown/not applicable | United States | 2009 |
| 275 | 381 | Lee S, Tsirbas A, Goldberg RA, McCann JD Standardized terminology for aesthetic ophthalmic plastic surgery. Ophthalmic plastic and reconstructive surgery 2006 Sep-Oct; 22(5): 371-4                                                                                | CT      | Pre-development          | Prospective content coverage | Anaesthesia                           | United States | 2006 |



| No  | Id  | Reference                                                                                                                                                                                                                                             | Version  | SNOMED CT Focus Category | Usage Category               | Domain                    | Country       | Year |
|-----|-----|-------------------------------------------------------------------------------------------------------------------------------------------------------------------------------------------------------------------------------------------------------|----------|--------------------------|------------------------------|---------------------------|---------------|------|
| 276 | 737 | Liu H, Burkhart Q, Bell DS<br>Evaluation of the NCPDP Structured and Codified Sig Format for e-prescriptions. Journal of the American Medical Informatics Association : JAMIA 2011 Sep-Oct;18(5):645-51                                               | CT       | Pre-development          | Prospective content coverage | Drugs                     | United States | 2011 |
| 277 | 768 | Liu H, Waghlikar K, Wu ST<br>Using SNOMED-CT to encode summary level data - a corpus analysis. AMIA Summits on Translational Science proceedings AMIA Summit on Translational Science 2012;2012:30-7                                                  | CT       | Pre-development          | Prospective content coverage | Problem list / diagnoses  | United States | 2012 |
| 278 | 401 | Mantena S, Schadow G<br>Evaluation of the VA/KP problem list subset of SNOMED as a clinical terminology for electronic prescription clinical decision support. AMIA ... Annual Symposium proceedings / AMIA Symposium. AMIA Symposium 2007; : 498-502 | CT       | Pre-development          | Prospective content coverage | Problem list / diagnoses  | United States | 2007 |
| 279 | 742 | Matney SA, Warren JJ, Evans JL, Kim TY, Coenen A, Auld VA<br>Development of the nursing problem list subset of SNOMED CT® Journal of biomedical informatics 2011 Dec 20;                                                                              | CT       | Pre-development          | Prospective content coverage | Nursing                   | United States | 2011 |
| 280 | 202 | McClay JC, Campbell J<br>Improved coding of the primary reason for visit to the emergency department using SNOMED. Proceedings / AMIA ... Annual Symposium. AMIA Symposium 2002; : 499-503                                                            | Multiple | Pre-development          | Prospective content coverage | Emergency department/room | United States | 2002 |

| No  | Id  | Reference                                                                                                                                                                                                                                                                                                | Version | SNOMED CT Focus Category | Usage Category               | Domain                                | Country       | Year |
|-----|-----|----------------------------------------------------------------------------------------------------------------------------------------------------------------------------------------------------------------------------------------------------------------------------------------------------------|---------|--------------------------|------------------------------|---------------------------------------|---------------|------|
| 281 | 628 | McCormick M., Windle T.A., Windle J.R. A new schema for problem lists: Towards real-time decision support. Journal of the American College of Cardiology 2010; 55: A132-                                                                                                                                 | CT      | Pre-development          | Prospective content coverage | Hospital                              | United States | 2010 |
| 282 | 378 | Min Z, Baofen D, Weeber M, van Ginneken AM Mapping OpenSDE domain models to SNOMED CT. Applied to the domain of cardiovascular disease. Methods of information in medicine 2006; 45(1): 4-9                                                                                                              | CT      | Pre-development          | Prospective content coverage | Cardiology                            | Netherlands   | 2006 |
| 283 | 441 | Osornio AL, Luna D, Gambarte ML, Gomez A, Reynoso G, de Quirós FG Creation of a local interface terminology to SNOMED CT. Studies in health technology and informatics 2007; 129(Pt 1): 765-9                                                                                                            | CT      | Pre-development          | Prospective content coverage | Other/multiple/unknown/not applicable | Argentina     | 2007 |
| 284 | 707 | Pathak J, Wang J, Kashyap S, Basford M, Li R, Masys DR, Chute CG Mapping clinical phenotype data elements to standardized metadata repositories and controlled terminologies: the eMERGE Network experience. Journal of the American Medical Informatics Association : JAMIA 2011 Jul-Aug; 18(4): 376-86 | CT      | Pre-development          | Prospective content coverage | Genetics                              | United States | 2011 |
| 285 | 268 | Penz JF, Brown SH, Carter JS, Elkin PL, Nguyen VN, Sims SA, Lincoln MJ Evaluation of SNOMED coverage of Veterans Health Administration terms. Studies in health technology                                                                                                                               | CT      | Pre-development          | Prospective content coverage | Other/multiple/unknown/not applicable | United States | 2004 |

| No  | Id  | Reference                                                                                                                                                                                                                                                                      | Version | SNOMED CT Focus Category | Usage Category               | Domain       | Country        | Year |
|-----|-----|--------------------------------------------------------------------------------------------------------------------------------------------------------------------------------------------------------------------------------------------------------------------------------|---------|--------------------------|------------------------------|--------------|----------------|------|
|     |     | and informatics 2004; 107(Pt 1): 540-4                                                                                                                                                                                                                                         |         |                          |                              |              |                |      |
| 286 | 749 | Přečková P, Zvárová J, Zvára K Measuring diversity in medical reports based on categorized attributes and international classification systems. BMC medical informatics and decision making 2012 Apr 12;12:31                                                                  | CT      | Pre-development          | Prospective content coverage | Cardiology   | Czech Republic | 2012 |
| 287 | 459 | Ravvaz K, Senk P, Patrick TB, Coenen A, Kim TY, Zhao H, Gaudioso C, Jansen KR, Lang NM Mapping nursing concepts to ontologies for evidence-based nursing. AMIA ... Annual Symposium proceedings / AMIA Symposium. AMIA Symposium 2008; : 1105                                  | CT      | Pre-development          | Prospective content coverage | Nursing      | United States  | 2008 |
| 288 | 371 | Richesson RL, Andrews JE, Krischer JP Use of SNOMED CT to represent clinical research data: a semantic characterization of data items on case report forms in vasculitis research. Journal of the American Medical Informatics Association : JAMIA 2006 Sep-Oct; 13(5): 536-46 | CT      | Pre-development          | Prospective content coverage | Rheumatology | United States  | 2006 |
| 289 | 543 | Rollason W, Khunti K, de Lusignan S Variation in the recording of diabetes diagnostic data in primary care computer systems: implications for the quality of care. Informatics in primary care 2009; 17(2): 113-9                                                              | CT      | Pre-development          | Prospective content coverage | Chronic care | United Kingdom | 2009 |
| 290 | 704 | Sampalli T, Shepherd M,                                                                                                                                                                                                                                                        | CT      | Pre-development          | Prospective content          | Chronic care | Canada         | 2011 |

| No  | Id  | Reference                                                                                                                                                                                                        | Version | SNOMED CT Focus Category | Usage Category               | Domain       | Country       | Year |
|-----|-----|------------------------------------------------------------------------------------------------------------------------------------------------------------------------------------------------------------------|---------|--------------------------|------------------------------|--------------|---------------|------|
|     |     | Duffy J Clinical vocabulary as a boundary object in multidisciplinary care management of multiple chemical sensitivity, a complex and chronic condition. Journal of multidisciplinary healthcare 2011; 4: 91-102 |         |                          | coverage                     |              |               |      |
| 291 | 618 | Sampalli T, Shepherd M, Duffy J, Fox R An evaluation of SNOMED CT in the domain of complex chronic conditions. International journal of integrated care 2010; 10: e038                                           | CT      | Pre-development          | Prospective content coverage | Chronic care | Canada        | 2010 |
| 292 | 592 | Sarkar IN Leveraging biomedical ontologies and annotation services to organize microbiome data from Mammalian hosts. AMIA ... Annual Symposium proceedings / AMIA Symposium. AMIA Symposium 2010; 2010: 717-21   | CT      | Pre-development          | Prospective content coverage | Genetics     | United States | 2010 |
| 293 | 551 | Shah N., Pittelkow M. Assessment of dermatology-domain specific term coverage in ICD-9 and SNOMED-CT using a dermatology textbook index. Journal of Investigative Dermatology 2009; 129: S60-                    | CT      | Pre-development          | Prospective content coverage | Dermatology  | Unknown       | 2009 |
| 294 | 342 | Shah NH, Rubin DL, Supekar KS, Musen MA Ontology-based annotation and query of tissue microarray data. AMIA ... Annual Symposium proceedings / AMIA Symposium. AMIA                                              | CT      | Pre-development          | Prospective content coverage | Pathology    | United States | 2006 |

| No  | Id  | Reference                                                                                                                                                                                                                           | Version | SNOMED CT Focus Category | Usage Category               | Domain                    | Country       | Year |
|-----|-----|-------------------------------------------------------------------------------------------------------------------------------------------------------------------------------------------------------------------------------------|---------|--------------------------|------------------------------|---------------------------|---------------|------|
|     |     | Symposium 2006; : 709-13                                                                                                                                                                                                            |         |                          |                              |                           |               |      |
| 295 | 463 | Smith CA, Wicks PJ<br>PatientsLikeMe: Consumer health vocabulary as a folksonomy. AMIA ... Annual Symposium proceedings / AMIA Symposium. AMIA Symposium 2008; : 682-6                                                              | CT      | Pre-development          | Prospective content coverage | Problem list / diagnoses  | United States | 2008 |
| 296 | 719 | So EY, Park HA Mapping medical records of gastrectomy patients to SNOMED CT. Studies in health technology and informatics 2011; 169: 764-8                                                                                          | CT      | Pre-development          | Prospective content coverage | Gastroenterology          | South Korea   | 2011 |
| 297 | 833 | Thomas N, Minard JP, Loughheed M Primary care asthma program's asthma care map: Use of SNOMED-CT and LOINC to standardize terminology for electronic health records Am. J. Respir. Crit. Care Med. 2010; 181(1 MeetingAbstracts): - | CT      | Pre-development          | Prospective content coverage | Primary care              | Canada        | 2010 |
| 298 | 331 | Travers DA, Haas SW Unified medical language system coverage of emergency-medicine chief complaints. Academic emergency medicine : official journal of the Society for Academic Emergency Medicine 2006 Dec; 13(12): 1319-23        | CT      | Pre-development          | Prospective content coverage | Emergency department/room | United States | 2006 |
| 299 | 638 | Trusko B, Rosenbloom ST, Montella D, Jackson JC, Fitzhenry F, Brown SH, Elkin PL, Fielstein E, Kotter K, Tuttle M, Iannelli RJ, Speroff T Are posttraumatic stress                                                                  | CT      | Pre-development          | Prospective content coverage | Mental                    | United States | 2010 |

| No  | Id  | Reference                                                                                                                                                                                                                                                              | Version | SNOMED CT Focus Category | Usage Category               | Domain                                | Country     | Year |
|-----|-----|------------------------------------------------------------------------------------------------------------------------------------------------------------------------------------------------------------------------------------------------------------------------|---------|--------------------------|------------------------------|---------------------------------------|-------------|------|
|     |     | disorder mental health terms found in SNOMED-CT medical terminology. Journal of traumatic stress 2010 Dec; 23(6): 794-801                                                                                                                                              |         |                          |                              |                                       |             |      |
| 300 | 396 | van der Kooij J, Goossen WT, Goossen-Baremans AT, de Jong-Fintelman M, van Beek L Using SNOMED CT codes for coding information in electronic health records for stroke patients. Studies in health technology and informatics 2006; 124: 815-23                        | CT      | Pre-development          | Prospective content coverage | Other/multiple/unknown/not applicable | Netherlands | 2006 |
| 301 | 607 | Vázquez-Naya JM, Martínez-Romero M, Porto-Pazos AB, Novoa F, Valladares-Ayerbes M, Pereira J, Munteanu CR, Dorado J Ontologies of drug discovery and design for neurology, cardiology and oncology. Current pharmaceutical design 2010; 16(24): 2724-36                | CT      | Pre-development          | Prospective content coverage | Drugs                                 | Spain       | 2010 |
| 302 | 773 | Vikström A, Hägglund M, Nyström M, Strender LE, Koch S, Hjerpe P, Lindblad U, Nilsson GH Coding of procedures documented by general practitioners in Swedish primary care-an explorative study using two procedure coding systems. BMC family practice 2012 Jan 9;13:2 | CT      | Pre-development          | Prospective content coverage | Primary care                          | Sweden      | 2012 |
| 303 | 393 | Vikström A, Nilsson G SNOMED CT in multidisciplinary clinical practice--evaluation of usefulness for classification and coding of care-planning                                                                                                                        | CT      | Pre-development          | Prospective content coverage | Other/multiple/unknown/not applicable | Sweden      | 2006 |

| No  | Id  | Reference                                                                                                                                                                                                               | Version | SNOMED CT Focus Category | Usage Category               | Domain                                | Country            | Year |
|-----|-----|-------------------------------------------------------------------------------------------------------------------------------------------------------------------------------------------------------------------------|---------|--------------------------|------------------------------|---------------------------------------|--------------------|------|
|     |     | procedures. Studies in health technology and informatics 2006; 124: 824-9                                                                                                                                               |         |                          |                              |                                       |                    |      |
| 304 | 452 | Wade G, Gotlieb EM, Weigle C, Warren R Assessing voids in SNOMED CT for pediatric concepts. AMIA ... Annual Symposium proceedings / AMIA Symposium. AMIA Symposium 2008; : 1164                                         | CT      | Pre-development          | Prospective content coverage | Paediatrics                           | United States      | 2008 |
| 305 | 471 | Wade G, Rosenbloom ST Experiences mapping a legacy interface terminology to SNOMED CT. BMC medical informatics and decision making 2008; 8 Suppl 1: S3                                                                  | CT      | Pre-development          | Prospective content coverage | Other/multiple/unknown/not applicable | United States      | 2008 |
| 306 | 344 | Warren JJ, Wilson RP Representing cardiovascular concepts in an electronic health record using SNOMED CT. AMIA ... Annual Symposium proceedings / AMIA Symposium. AMIA Symposium 2006; : 1135                           | CT      | Pre-development          | Prospective content coverage | Cardiology                            | United States      | 2006 |
| 307 | 208 | Wasserman H, Wang J An applied evaluation of SNOMED CT as a clinical vocabulary for the computerized diagnosis and problem list. AMIA ... Annual Symposium proceedings / AMIA Symposium. AMIA Symposium 2003; : 699-703 | CT      | Pre-development          | Prospective content coverage | Problem list / diagnoses              | United States      | 2003 |
| 308 | 837 | Wyke S, Orford R, Duarte-Davidson R, Pelclova D, Edwards N, Kennedy K, Sutton N, Good AM, Desel H, Schaper A, Bronstein A, Dragelyte G, Mathieu-Nolf                                                                    | CT      | Pre-development          | Prospective content coverage | Other/multiple/unknown/not applicable | Multiple countries | 2010 |

| No  | Id  | Reference                                                                                                                                                                                                                        | Version | SNOMED CT Focus Category | Usage Category                    | Domain                                | Country       | Year |
|-----|-----|----------------------------------------------------------------------------------------------------------------------------------------------------------------------------------------------------------------------------------|---------|--------------------------|-----------------------------------|---------------------------------------|---------------|------|
|     |     | M, Kupferschmidt H The evaluation of standard medical terminology systems to describe symptoms of poisoning, An output of the ASHTII project Clin. Toxicol. 2010; 48(3): 271                                                     |         |                          |                                   |                                       |               |      |
| 309 | 876 | Yu A, Ballow M, Shvarts A, Lehman H Evaluation of coverage of allergy concepts in electronic health records J. Allergy Clin. Immunol. 2012; 129(2 SUPPL. 1): AB108                                                               | CT      | Pre-development          | Prospective content coverage      | Allergies                             | United States | 2012 |
| 310 | 487 | Andrews JE, Patrick TB, Richesson RL, Brown H, Krischer JP Comparing heterogeneous SNOMED CT coding of clinical research concepts by examining normalized expressions. Journal of biomedical informatics 2008 Dec; 41(6): 1062-9 | CT      | Pre-development          | Prospective inter-rater agreement | Other/multiple/unknown/not applicable | United States | 2008 |
| 311 | 427 | Andrews JE, Richesson RL, Krischer J Variation of SNOMED CT coding of clinical research concepts among coding experts. Journal of the American Medical Informatics Association : JAMIA 2007 Jul-Aug; 14(4): 497-506              | CT      | Pre-development          | Prospective inter-rater agreement | Pathology                             | United States | 2007 |
| 312 | 343 | Chiang MF, Hwang JC, Yu AC, Casper DS, Cimino JJ, Starren JB Reliability of SNOMED-CT coding by three physicians using two terminology browsers. AMIA ... Annual Symposium proceedings / AMIA Symposium. AMIA                    | CT      | Pre-development          | Prospective inter-rater agreement | Ophthalmology                         | United States | 2006 |



| No  | Id  | Reference                                                                                                                                                                                                                                      | Version | SNOMED CT Focus Category | Usage Category                    | Domain                                | Country       | Year |
|-----|-----|------------------------------------------------------------------------------------------------------------------------------------------------------------------------------------------------------------------------------------------------|---------|--------------------------|-----------------------------------|---------------------------------------|---------------|------|
|     |     | Symposium 2006; : 131-5                                                                                                                                                                                                                        |         |                          |                                   |                                       |               |      |
| 313 | 826 | Hwang JC, Yu AC, Casper DS, Starren J, Cimino JJ, Chiang MF Representation of Ophthalmology Concepts by Electronic Systems. Intercoder Agreement among Physicians Using Controlled Terminologies Ophthalmology 2006; 113(4): 511-519           | CT      | Pre-development          | Prospective inter-rater agreement | Ophthalmology                         | United States | 2006 |
| 314 | 382 | Hwang JC, Yu AC, Casper DS, Starren J, Cimino JJ, Chiang MF Representation of ophthalmology concepts by electronic systems: intercoder agreement among physicians using controlled terminologies. Ophthalmology 2006 Apr; 113(4): 511-9        | CT      | Pre-development          | Prospective inter-rater agreement | Ophthalmology                         | United States | 2006 |
| 315 | 747 | Kim SY, Kim HH, Shin KH, Kim HS, Lee JI, Choi BK Comparison of Knowledge Levels Required for SNOMED CT Coding of Diagnosis and Operation Names in Clinical Records. Healthcare informatics research 2012 Sep;18(3):186-90                      | CT      | Pre-development          | Prospective inter-rater agreement | Other/multiple/unknown/not applicable | South Korea   | 2012 |
| 316 | 464 | Patrick TB, Richesson R, Andrews JE, Folk LC SNOMED CT coding variation and grouping for "other findings" in a longitudinal study on urea cycle disorders. AMIA ... Annual Symposium proceedings / AMIA Symposium. AMIA Symposium 2008; : 11-5 | CT      | Pre-development          | Prospective inter-rater agreement | Internal medicine                     | United States | 2008 |

| No  | Id  | Reference                                                                                                                                                                                                                                                                          | Version | SNOMED CT Focus Category | Usage Category                    | Domain                                | Country       | Year |
|-----|-----|------------------------------------------------------------------------------------------------------------------------------------------------------------------------------------------------------------------------------------------------------------------------------------|---------|--------------------------|-----------------------------------|---------------------------------------|---------------|------|
| 317 | 330 | Zimmerman KL, Wilcke JR, Robertson JL, Feldman BF, Kaur T, Rees LR, Spackman KA SNOMED representation of explanatory knowledge in veterinary clinical pathology. Veterinary clinical pathology / American Society for Veterinary Clinical Pathology 2005; 34(1): 7-16              | CT      | Pre-development          | Prospective inter-rater agreement | Pathology                             | United States | 2005 |
| 318 | 597 | Abhyankar S, Lloyd-Puryear MA, Goodwin R, Copeland S, Eichwald J, Therrell BL, Zuckerman A, Downing G, McDonald CJ Standardizing newborn screening results for health information exchange. AMIA ... Annual Symposium proceedings / AMIA Symposium. AMIA Symposium 2010; 2010: 1-5 | CT      | Pre-development          | Standard for EHR                  | Newborn                               | United States | 2010 |
| 319 | 515 | Bernstein K, Andersen U Managing care pathways combining SNOMED CT, archetypes and an electronic guideline system. Studies in health technology and informatics 2008; 136: 353-8                                                                                                   | CT      | Pre-development          | Standard for EHR                  | Hospital                              | Denmark       | 2008 |
| 320 | 386 | Bernstein K, Bruun-Rasmussen M, Vingtoft S A method for specification of structured clinical content in electronic health records. Studies in health technology and informatics 2006; 124: 515-21                                                                                  | CT      | Pre-development          | Standard for EHR                  | Cardiology                            | Denmark       | 2006 |
| 321 | 715 | Bird L, Brooks C, Cheong YC, Tun NN A logical approach to semantic interoperability in healthcare. Studies in                                                                                                                                                                      | CT      | Pre-development          | Standard for EHR                  | Other/multiple/unknown/not applicable | Singapore     | 2011 |

| No  | Id  | Reference                                                                                                                                                                                                                                                                                                                        | Version | SNOMED CT Focus Category | Usage Category   | Domain                                | Country            | Year |
|-----|-----|----------------------------------------------------------------------------------------------------------------------------------------------------------------------------------------------------------------------------------------------------------------------------------------------------------------------------------|---------|--------------------------|------------------|---------------------------------------|--------------------|------|
|     |     | health technology and informatics 2011; 168: 1-9                                                                                                                                                                                                                                                                                 |         |                          |                  |                                       |                    |      |
| 322 | 494 | Bouhaddou O, Warnekar P, Parrish F, Do N, Mandel J, Kilbourne J, Lincoln MJ Exchange of computable patient data between the Department of Veterans Affairs (VA) and the Department of Defense (DoD): terminology mediation strategy. Journal of the American Medical Informatics Association : JAMIA 2008 Mar-Apr; 15(2): 174-83 | CT      | Pre-development          | Standard for EHR | Other/multiple/unknown/not applicable | United States      | 2008 |
| 323 | 761 | Bozkurt S, Kahn CE Jr An open-standards grammar for outline-style radiology report templates. Journal of digital imaging : the official journal of the Society for Computer Applications in Radiology 2012 Jun;25(3):359-64                                                                                                      | CT      | Pre-development          | Standard for EHR | Radiology                             | Multiple countries | 2012 |
| 324 | 679 | Bucur A., Fumagalli D., Desmedt C., Vdovjak R., Loi S., Saini K., Doci S.M., Schenk B., Sotiriou C., Piccart M.J. Integrate: Driving excellence in integrative cancer research through innovative biomedical infrastructures. European Journal of Cancer 2011; 47: S215-S216                                                     | CT      | Pre-development          | Standard for EHR | Other/multiple/unknown/not applicable | Multiple countries | 2011 |
| 325 | 724 | Cheong YC, Bird L, Tun NN, Brooks C Using a logical information model-driven design process in healthcare. Studies in health technology and informatics 2011; 169: 804-8                                                                                                                                                         | CT      | Pre-development          | Standard for EHR | Other/multiple/unknown/not applicable | Singapore          | 2011 |

| No  | Id  | Reference                                                                                                                                                                                                                                                                                                                                                                                                                                                                                                   | Version | SNOMED CT Focus Category | Usage Category   | Domain                                | Country            | Year |
|-----|-----|-------------------------------------------------------------------------------------------------------------------------------------------------------------------------------------------------------------------------------------------------------------------------------------------------------------------------------------------------------------------------------------------------------------------------------------------------------------------------------------------------------------|---------|--------------------------|------------------|---------------------------------------|--------------------|------|
| 326 | 751 | Daniel C, Booker D, Beckwith B, Della Mea V, García-Rojo M, Havener L, Kennedy M, Klossa J, Laurinavicius A, Macary F, Punys V, Scharber W, Schrader T Standards and specifications in pathology: image management, report management and terminology. Studies in health technology and informatics 2012;179:105-22                                                                                                                                                                                         | CT      | Pre-development          | Standard for EHR | Pathology                             | Multiple countries | 2012 |
| 327 | 678 | Daniel C, Macary F, Rojo MG, Klossa J, Laurinavičius A, Beckwith BA, Della Mea V Recent advances in standards for Collaborative Digital Anatomic Pathology. Diagnostic pathology 2011; 6 Suppl 1: S17                                                                                                                                                                                                                                                                                                       | CT      | Pre-development          | Standard for EHR | Pathology                             | France             | 2011 |
| 328 | 269 | Dolin RH, Mattison JE, Cohn S, Campbell KE, Wiesenthal AM, Hochhalter B, LaBerge D, Barsoum R, Shalaby J, Abilla A, Clements RJ, Correia CM, Esteva D, Fedack JM, Goldberg BJ, Gopal Rao S, Hafeza E, Hendler P, Hernandez E, Kamangar R, Kahn RA, Kurtovich G, Lazzareschi G, Lee MH, Lee T, Levy D, Lukoff JY, Lundberg C, Madden MP, Ngo TL, Nguyen BT, Patel NP, Resneck J, Ross DE, Schwarz KM, Selhorst CC, Snyder A, Umarji MI, Vilner M, Zer-Chen R, Zingo C Kaiser Permanente's Convergent Medical | CT      | Pre-development          | Standard for EHR | Other/multiple/unknown/not applicable | United States      | 2004 |

| No  | Id  | Reference                                                                                                                                                                                                                     | Version | SNOMED CT Focus Category | Usage Category   | Domain                                | Country       | Year |
|-----|-----|-------------------------------------------------------------------------------------------------------------------------------------------------------------------------------------------------------------------------------|---------|--------------------------|------------------|---------------------------------------|---------------|------|
|     |     | Terminology. Studies in health technology and informatics 2004; 107(Pt 1): 346-50                                                                                                                                             |         |                          |                  |                                       |               |      |
| 329 | 734 | Fidahusseini M, Friedlin J, Grannis S Practical challenges in the secondary use of real-world data: the notifiable condition detector. AMIA ... Annual Symposium proceedings / AMIA Symposium. AMIA Symposium 2011;2011:402-8 | CT      | Pre-development          | Standard for EHR | Laboratory                            | United States | 2011 |
| 330 | 421 | Garde S, Hovenga E, Buck J, Knaup P Expressing clinical data sets with openEHR archetypes: a solid basis for ubiquitous computing. International journal of medical informatics 2007 Dec; 76 Suppl 3: S334-41                 | CT      | Pre-development          | Standard for EHR | Paediatrics                           | Germany       | 2007 |
| 331 | 442 | Hamm RA, Knoop SE, Schwarz P, Block AD, Davis WL Harmonizing clinical terminologies: driving interoperability in healthcare. Studies in health technology and informatics 2007; 129(Pt 1): 660-3                              | CT      | Pre-development          | Standard for EHR | Other/multiple/unknown/not applicable | United States | 2007 |
| 332 | 699 | Heymans S, McKennirey M, Phillips J Semantic validation of the use of SNOMED CT in HL7 clinical documents. Journal of biomedical semantics 2011; 2(1): 2                                                                      | CT      | Pre-development          | Standard for EHR | Other/multiple/unknown/not applicable | United States | 2011 |
| 333 | 300 | Hovenga E, Garde S, Heard S Nursing constraint models for electronic health records: a vision for domain                                                                                                                      | CT      | Pre-development          | Standard for EHR | Nursing                               | Australia     | 2005 |

| No  | Id  | Reference                                                                                                                                                                                                                                                                      | Version | SNOMED CT Focus Category | Usage Category   | Domain                                | Country            | Year |
|-----|-----|--------------------------------------------------------------------------------------------------------------------------------------------------------------------------------------------------------------------------------------------------------------------------------|---------|--------------------------|------------------|---------------------------------------|--------------------|------|
|     |     | knowledge governance. International journal of medical informatics 2005 Dec; 74(11-12): 886-98                                                                                                                                                                                 |         |                          |                  |                                       |                    |      |
| 334 | 345 | Hunscher D, Boyd A, Green LA, Clauw DJ Representing natural-language case report form terminology using Health Level 7 Common Document Architecture, LOINC, and SNOMED-CT: lessons learned. AMIA ... Annual Symposium proceedings / AMIA Symposium. AMIA Symposium 2006; : 961 | CT      | Pre-development          | Standard for EHR | Other/multiple/unknown/not applicable | United States      | 2006 |
| 335 | 700 | Hurrell M.J., Monk T.G., Nicol A., Norton A.N., Reich D.L., Walsh J.L. Implementation of a standards-based, CDA-compliant anesthesia record. Journal of Clinical Monitoring and Computing 2011; 25: 15-16                                                                      | CT      | Pre-development          | Standard for EHR | Anaesthesia                           | Multiple countries | 2011 |
| 336 | 613 | Hwang KH, Chung KI, Chung MA, Choi D Review of semantically interoperable electronic health records for ubiquitous healthcare. Healthcare informatics research 2010 Mar; 16(1): 1-5                                                                                            | CT      | Pre-development          | Standard for EHR | Other/multiple/unknown/not applicable | South Korea        | 2010 |
| 337 | 796 | Kostick K SNOMED CT integral part of quality EHR documentation. Journal of AHIMA / American Health Information Management Association 2012 Oct;83(10):72-5                                                                                                                     | CT      | Pre-development          | Standard for EHR | Other/multiple/unknown/not applicable | United States      | 2012 |
| 338 | 695 | Lezcano L, Sicilia MA, Rodríguez-Solano C                                                                                                                                                                                                                                      | CT      | Pre-development          | Standard for EHR | Anaesthesia                           | Spain              | 2011 |

| No  | Id  | Reference                                                                                                                                                                                                                                                                                                                | Version | SNOMED CT Focus Category | Usage Category   | Domain                                | Country       | Year |
|-----|-----|--------------------------------------------------------------------------------------------------------------------------------------------------------------------------------------------------------------------------------------------------------------------------------------------------------------------------|---------|--------------------------|------------------|---------------------------------------|---------------|------|
|     |     | Integrating reasoning and clinical archetypes using OWL ontologies and SWRL rules. Journal of biomedical informatics 2011 Apr; 44(2): 343-53                                                                                                                                                                             |         |                          |                  |                                       |               |      |
| 339 | 525 | Liu S, Ni Y, Mei J, Li H, Xie G, Hu G, Liu H, Hou X, Pan Y iSMART: Ontology-based Semantic query of CDA documents. AMIA ... Annual Symposium proceedings / AMIA Symposium. AMIA Symposium 2009; 2009: 375-9                                                                                                              | CT      | Pre-development          | Standard for EHR | Other/multiple/unknown/not applicable | China         | 2009 |
| 340 | 783 | Lougheed MD, Minard J, Dworkin S, Juurlink MA, Temple WJ, To T, Koehn M, Van Dam A, Boulet LP Pan-Canadian RESpiratory STandards INitiative for Electronic Health Records (PRESTINE): 2011 national forum proceedings. Canadian respiratory journal : journal of the Canadian Thoracic Society 2012 Mar-Apr;19(2):117-26 | CT      | Pre-development          | Standard for EHR | Other/multiple/unknown/not applicable | Canada        | 2012 |
| 341 | 791 | Meizoso García M, Iglesias Allones JL, Martínez Hernández D, Taboada Iglesias MJ Semantic similarity-based alignment between clinical archetypes and SNOMED CT: an application to observations. International journal of medical informatics 2012 Aug;81(8):566-78                                                       | CT      | Pre-development          | Standard for EHR | Other/multiple/unknown/not applicable | Spain         | 2012 |
| 342 | 491 | Mollura DJ, Carrino JA, Matuszak DL, Mnatsakanyan ZR, Eng J, Cutchis P, Babin                                                                                                                                                                                                                                            | CT      | Pre-development          | Standard for EHR | Radiology                             | United States | 2008 |

| No  | Id  | Reference                                                                                                                                                                                                                                                                                                                                       | Version | SNOMED CT Focus Category | Usage Category   | Domain                                | Country        | Year |
|-----|-----|-------------------------------------------------------------------------------------------------------------------------------------------------------------------------------------------------------------------------------------------------------------------------------------------------------------------------------------------------|---------|--------------------------|------------------|---------------------------------------|----------------|------|
|     |     | SM, Sniegowski C, Lombardo JS Bridging radiology and public health: the emerging field of radiologic public health informatics. Journal of the American College of Radiology : JACR 2008 Mar; 5(3): 174-81                                                                                                                                      |         |                          |                  |                                       |                |      |
| 343 | 479 | Moner D, Maldonado JA, Angulo C, Bosca D, Perez D, Abad I, Reig E, Robles M Standardization of discharge reports with the ISO 13606 norm. Conference proceedings : ... Annual International Conference of the IEEE Engineering in Medicine and Biology Society. IEEE Engineering in Medicine and Biology Society. Conference 2008; 2008: 1470-3 | CT      | Pre-development          | Standard for EHR | Hospital                              | Spain          | 2008 |
| 344 | 645 | Nagy M, Hanzlíček P, Precková P, Ríha A, Dioszegi M, Seidl L, Zvárová J Semantic interoperability in Czech healthcare environment supported by HL7 version 3. Methods of information in medicine 2010; 49(2): 186-95                                                                                                                            | CT      | Pre-development          | Standard for EHR | Other/multiple/unknown/not applicable | Czech Republic | 2010 |
| 345 | 794 | Ouagne D, Hussain S, Sadou E, Jaulent MC, Daniel C The Electronic Healthcare Record for Clinical Research (EHR4CR) information model and terminology. Studies in health technology and informatics 2012;180:534-8                                                                                                                               | CT      | Pre-development          | Standard for EHR | Other/multiple/unknown/not applicable | France         | 2012 |
| 346 | 535 | Pantazatos SP, Li J, Pavlidis P, Lussier YA Integration of                                                                                                                                                                                                                                                                                      | CT      | Pre-development          | Standard for EHR | Pathology                             | United States  | 2009 |



| No  | Id  | Reference                                                                                                                                                                                                                                 | Version | SNOMED CT Focus Category | Usage Category   | Domain                                | Country        | Year |
|-----|-----|-------------------------------------------------------------------------------------------------------------------------------------------------------------------------------------------------------------------------------------------|---------|--------------------------|------------------|---------------------------------------|----------------|------|
|     |     | Neuroimaging and Microarray Datasets through Mapping and Model-Theoretic Semantic Decomposition of Unstructured Phenotypes. Cancer informatics 2009 Jun 8; 8: 75-94                                                                       |         |                          |                  |                                       |                |      |
| 347 | 840 | Patil NG, Doll C, Ghatge P, Korschuh S, Temple W, Craighead P Web-based synoptic reporting for gynecologic radiation oncologists: An alberta initiative Radiother. Oncol. 2010; 96: S52                                                   | CT      | Pre-development          | Standard for EHR | Other/multiple/unknown/not applicable | Canada         | 2010 |
| 348 | 405 | Qamar R, Kola J, Rector AL Unambiguous data modeling to ensure higher accuracy term binding to clinical terminologies. AMIA ... Annual Symposium proceedings / AMIA Symposium. AMIA Symposium 2007; : 608-13                              | CT      | Pre-development          | Standard for EHR | Other/multiple/unknown/not applicable | United Kingdom | 2007 |
| 349 | 446 | Qamar R, Rector A Semantic issues in integrating data from different models to achieve data interoperability. Studies in health technology and informatics 2007; 129(Pt 1): 674-8                                                         | CT      | Pre-development          | Standard for EHR | Other/multiple/unknown/not applicable | United States  | 2007 |
| 350 | 631 | Rajeev D, Staes CJ, Evans RS, Mottice S, Rolfs R, Samore MH, Whitney J, Kurzban R, Huff SM Development of an electronic public health case report using HL7 v2.5 to meet public health needs. Journal of the American Medical Informatics | CT      | Pre-development          | Standard for EHR | Other/multiple/unknown/not applicable | United States  | 2010 |

| No  | Id  | Reference                                                                                                                                                                                                        | Version  | SNOMED CT Focus Category | Usage Category   | Domain                                | Country       | Year |
|-----|-----|------------------------------------------------------------------------------------------------------------------------------------------------------------------------------------------------------------------|----------|--------------------------|------------------|---------------------------------------|---------------|------|
|     |     | Association : JAMIA 2010 Jan-Feb; 17(1): 34-41                                                                                                                                                                   |          |                          |                  |                                       |               |      |
| 351 | 505 | Ryan A, Eklund P A framework for semantic interoperability in healthcare: a service oriented architecture based on health informatics standards. Studies in health technology and informatics 2008; 136: 759-64  | CT       | Pre-development          | Standard for EHR | Hospital                              | Australia     | 2008 |
| 352 | 834 | Ryan A, Eklund P The health service bus: An architecture and case study in achieving interoperability in healthcare Stud. Health Technol. Informatics 2010; 160(PART 1): 922-926                                 | CT       | Pre-development          | Standard for EHR | Other/multiple/unknown/not applicable | Australia     | 2010 |
| 353 | 449 | Ryan A, Eklund P, Esler B Toward the interoperability of HL7 v3 and SNOMED CT: a case study modeling mobile clinical treatment. Studies in health technology and informatics 2007; 129(Pt 1): 626-30             | CT       | Pre-development          | Standard for EHR | Other/multiple/unknown/not applicable | Australia     | 2007 |
| 354 | 474 | Sundvall E, Qamar R, Nyström M, Forss M, Petersson H, Karlsson D, Ahlfeldt H, Rector A Integration of tools for binding archetypes to SNOMED CT. BMC medical informatics and decision making 2008; 8 Suppl 1: S7 | CT       | Pre-development          | Standard for EHR | Other/multiple/unknown/not applicable | Sweden        | 2008 |
| 355 | 289 | Wurtz R, Cameron BJ Electronic laboratory reporting for the infectious diseases physician and clinical microbiologist. Clinical infectious diseases :                                                            | Multiple | Pre-development          | Standard for EHR | Laboratory                            | United States | 2005 |

| No  | Id  | Reference                                                                                                                                                                                                                    | Version | SNOMED CT Focus Category | Usage Category   | Domain                                | Country | Year |
|-----|-----|------------------------------------------------------------------------------------------------------------------------------------------------------------------------------------------------------------------------------|---------|--------------------------|------------------|---------------------------------------|---------|------|
|     |     | an official publication of the Infectious Diseases Society of America 2005 Jun 1; 40(11): 1638-43                                                                                                                            |         |                          |                  |                                       |         |      |
| 356 | 672 | Xiao L, Cousins G, Courtney B, Hederman L, Fahey T, Dimitrov BD Developing an electronic health record (EHR) for methadone treatment recording and decision support. BMC medical informatics and decision making 2011; 11: 5 | CT      | Pre-development          | Standard for EHR | Drugs                                 | Ireland | 2011 |
| 357 | 738 | Yu S, Berry D, Bisbal J Clinical coverage of an archetype repository over SNOMED-CT. Journal of biomedical informatics 2012 Jun;45(3):408-18                                                                                 | CT      | Pre-development          | Standard for EHR | Other/multiple/unknown/not applicable | Ireland | 2011 |
| 358 | 716 | Abdoune H, Merabti T, Darmoni SJ, Joubert M Assisting the translation of the CORE subset of SNOMED CT into French. Studies in health technology and informatics 2011; 169: 819-23                                            | CT      | Pre-development          | Translation      | Problem list / diagnoses              | France  | 2011 |
| 359 | 334 | Deléger L, Merkel M, Zweigenbaum P Contribution to terminology internationalization by word alignment in parallel corpora. AMIA ... Annual Symposium proceedings / AMIA Symposium. AMIA Symposium 2006; : 185-9              | CT      | Pre-development          | Translation      | Other/multiple/unknown/not applicable | France  | 2006 |
| 360 | 388 | Deleger L, Merkel M, Zweigenbaum P Enriching medical terminologies: an approach based on aligned corpora. Studies in health                                                                                                  | CT      | Pre-development          | Translation      | Other/multiple/unknown/not applicable | France  | 2006 |

| No  | Id  | Reference                                                                                                                                                                                                                                                           | Version | SNOMED CT Focus Category | Usage Category        | Domain                                | Country       | Year |
|-----|-----|---------------------------------------------------------------------------------------------------------------------------------------------------------------------------------------------------------------------------------------------------------------------|---------|--------------------------|-----------------------|---------------------------------------|---------------|------|
|     |     | technology and informatics 2006; 124: 747-52                                                                                                                                                                                                                        |         |                          |                       |                                       |               |      |
| 361 | 548 | Deléger L, Merkel M, Zweigenbaum P Translating medical terminologies through word alignment in parallel text corpora. Journal of biomedical informatics 2009 Aug; 42(4): 692-701                                                                                    | CT      | Pre-development          | Translation           | Other/multiple/unknown/not applicable | France        | 2009 |
| 362 | 522 | Joubert M, Abdoune H, Merabti T, Darmoni S, Fieschi M Assisting the translation of SNOMED CT into French using UMLS and four representative French-language terminologies. AMIA ... Annual Symposium proceedings / AMIA Symposium. AMIA Symposium 2009; 2009: 291-5 | CT      | Pre-development          | Translation           | Other/multiple/unknown/not applicable | France        | 2009 |
| 363 | 577 | Klein GO, Chen R Translation of SNOMED CT - strategies and description of a pilot project. Studies in health technology and informatics 2009; 146: 673-7                                                                                                            | CT      | Pre-development          | Translation           | Other/multiple/unknown/not applicable | Sweden        | 2009 |
| 364 | 757 | Zhu Y, Pan H, Zhou L, Zhao W, Chen A, Andersen U, Pan S, Tian L, Lei J Translation and localization of SNOMED CT in China: a pilot study. Artificial intelligence in medicine 2012 Feb;54(2):147-9                                                                  | CT      | Pre-development          | Translation           | SNOMED CT Hierarchy                   | China         | 2012 |
| 365 | 308 | Implementation of SNOMED-CT needed to facilitate interoperable exchange of health                                                                                                                                                                                   | CT      | Theoretic                | Description of SNOMED | Other/multiple/unknown/not applicable | United States | 2005 |

| No  | Id  | Reference                                                                                                                                                                                             | Version  | SNOMED CT Focus Category | Usage Category        | Domain                                | Country        | Year |
|-----|-----|-------------------------------------------------------------------------------------------------------------------------------------------------------------------------------------------------------|----------|--------------------------|-----------------------|---------------------------------------|----------------|------|
|     |     | information. Journal of the American Health Information Management Association 2005; 76: 30-                                                                                                          |          |                          |                       |                                       |                |      |
| 366 | 771 | Benson T The history of the Read Codes: the inaugural James Read Memorial Lecture 2011. Informatics in primary care 2011;19(3):173-82                                                                 | Multiple | Theoretic                | Description of SNOMED | Primary care                          | United Kingdom | 2012 |
| 367 | 392 | Casey A, Spisla C, Konicek D, Warren JJ Practical definition of SNOMED CT concepts: The case of education, advice and counselling. Studies in health technology and informatics 2006; 122: 742-5      | CT       | Theoretic                | Description of SNOMED | Nursing                               | United States  | 2006 |
| 368 | 723 | Ceusters W SNOMED CT's RF2: Is the future bright? Studies in health technology and informatics 2011; 169: 829-33                                                                                      | CT       | Theoretic                | Description of SNOMED | Other/multiple/unknown/not applicable | United States  | 2011 |
| 369 | 422 | Ceusters W, Elkin P, Smith B Negative findings in electronic health records and biomedical ontologies: a realist approach. International journal of medical informatics 2007 Dec; 76 Suppl 3: S326-33 | CT       | Theoretic                | Description of SNOMED | Other/multiple/unknown/not applicable | United States  | 2007 |
| 370 | 406 | Ceusters WM, Spackman KA, Smith B Would SNOMED CT benefit from realism-based ontology evolution? AMIA ... Annual Symposium proceedings / AMIA Symposium. AMIA Symposium 2007; : 105-9                 | CT       | Theoretic                | Description of SNOMED | Other/multiple/unknown/not applicable | United States  | 2007 |
| 371 | 376 | Chalmers RJ Health care                                                                                                                                                                               | Multiple | Theoretic                | Description of SNOMED | Other/multiple/unknown                | Multiple       | 2006 |

| No  | Id  | Reference                                                                                                                                                                                                                                                 | Version | SNOMED CT Focus Category | Usage Category        | Domain                                | Country       | Year |
|-----|-----|-----------------------------------------------------------------------------------------------------------------------------------------------------------------------------------------------------------------------------------------------------------|---------|--------------------------|-----------------------|---------------------------------------|---------------|------|
|     |     | terminology for the electronic era. Mayo Clinic proceedings. Mayo Clinic 2006 Jun; 81(6): 729-31                                                                                                                                                          |         |                          |                       | n/not applicable                      | countries     |      |
| 372 | 398 | Cimino JJ, Zhu X The practical impact of ontologies on biomedical informatics. Yearbook of medical informatics 2006; : 124-35                                                                                                                             | CT      | Theoretic                | Description of SNOMED | Other/multiple/unknown/not applicable | United States | 2006 |
| 373 | 546 | Cook J, Foley MM, Giannangelo K, Paterno MD, Scichilone RA, Schwarz KM Universal adapters. Terminology standards enable meaningful data exchange. Journal of AHIMA / American Health Information Management Association 2009 Jan; 80(1): 36-40; quiz 41-2 | CT      | Theoretic                | Description of SNOMED | Other/multiple/unknown/not applicable | United States | 2009 |
| 374 | 239 | Coonan KM Medical informatics standards applicable to emergency department information systems: making sense of the jumble. Academic emergency medicine : official journal of the Society for Academic Emergency Medicine 2004 Nov; 11(11): 1198-205      | CT      | Theoretic                | Description of SNOMED | Emergency department/room             | United States | 2004 |
| 375 | 559 | Cornet R Definitions and qualifiers in SNOMED CT. Methods of information in medicine 2009; 48(2): 178-83                                                                                                                                                  | CT      | Theoretic                | Description of SNOMED | Other/multiple/unknown/not applicable | Netherlands   | 2009 |
| 376 | 512 | Cornet R Do SNOMED CT relationships qualify? Studies in health technology and informatics 2008; 136:                                                                                                                                                      | CT      | Theoretic                | Description of SNOMED | Other/multiple/unknown/not applicable | Netherlands   | 2008 |

| No  | Id  | Reference                                                                                                                                                                                               | Version  | SNOMED CT Focus Category | Usage Category        | Domain                                | Country        | Year |
|-----|-----|---------------------------------------------------------------------------------------------------------------------------------------------------------------------------------------------------------|----------|--------------------------|-----------------------|---------------------------------------|----------------|------|
|     |     | 785-90                                                                                                                                                                                                  |          |                          |                       |                                       |                |      |
| 377 | 658 | Cornet R Information-content-based measures for the structure of terminological systems and for data recorded using these systems. Studies in health technology and informatics 2010; 160(Pt 2): 1075-9 | CT       | Theoretic                | Description of SNOMED | Other/multiple/unknown/not applicable | Netherlands    | 2010 |
| 378 | 721 | Cornet R, de Keizer NF Recording associated disorders using SNOMED CT. Studies in health technology and informatics 2011; 169: 824-8                                                                    | CT       | Theoretic                | Description of SNOMED | Problem list / diagnoses              | Netherlands    | 2011 |
| 379 | 575 | Cornet R, Schulz S Relationship groups in SNOMED CT. Studies in health technology and informatics 2009; 150: 223-7                                                                                      | CT       | Theoretic                | Description of SNOMED | Other/multiple/unknown/not applicable | Netherlands    | 2009 |
| 380 | 299 | de Lusignan S Codes, classifications, terminologies and nomenclatures: definition, development and application in practice. Informatics in primary care 2005; 13(1): 65-70                              | Multiple | Theoretic                | Description of SNOMED | Primary care                          | United Kingdom | 2005 |
| 381 | 354 | de Lusignan S, van Weel C The use of routinely collected computer data for research in primary care: opportunities and challenges. Family practice 2006 Apr; 23(2): 253-63                              | Multiple | Theoretic                | Description of SNOMED | Primary care                          | United Kingdom | 2006 |
| 382 | 516 | Donnelly K Multilingual documentation and classification. Studies in health technology and                                                                                                              | CT       | Theoretic                | Description of SNOMED | Other/multiple/unknown/not applicable | United States  | 2008 |

| No  | Id  | Reference                                                                                                                                                                                                                                                                                                                                                    | Version | SNOMED CT Focus Category | Usage Category        | Domain                                | Country       | Year |
|-----|-----|--------------------------------------------------------------------------------------------------------------------------------------------------------------------------------------------------------------------------------------------------------------------------------------------------------------------------------------------------------------|---------|--------------------------|-----------------------|---------------------------------------|---------------|------|
|     |     | informatics 2008; 134: 235-43                                                                                                                                                                                                                                                                                                                                |         |                          |                       |                                       |               |      |
| 383 | 394 | Donnelly K SNOMED-CT: The advanced terminology and coding system for eHealth. Studies in health technology and informatics 2006; 121: 279-90                                                                                                                                                                                                                 | CT      | Theoretic                | Description of SNOMED | Other/multiple/unknown/not applicable | United States | 2006 |
| 384 | 274 | Elevitch FR SNOMED CT: electronic health record enhances anesthesia patient safety. AANA journal 2005 Oct; 73(5): 361-6                                                                                                                                                                                                                                      | CT      | Theoretic                | Description of SNOMED | Anaesthesia                           | United States | 2005 |
| 385 | 560 | Foley MM, Glenn RM, Meli PL, Scichilone RA Policy agenda for the next decade: creating a path for graceful evolution and harmonized classifications and terminologies used for encoding health information in electronic environments. Perspectives in health information management / AHIMA, American Health Information Management Association 2009; 6: 1c | CT      | Theoretic                | Description of SNOMED | Other/multiple/unknown/not applicable | United States | 2009 |
| 386 | 763 | García-Rojo M, Daniel C, Laurinavicius A SNOMED CT in Pathology. Studies in health technology and informatics 2012;179:123-40                                                                                                                                                                                                                                | CT      | Theoretic                | Description of SNOMED | Pathology                             | Spain         | 2012 |
| 387 | 305 | Giannangelo K, Berkowitz L SNOMED CT helps drive EHR success. Journal of AHIMA / American Health Information Management Association 2005 Apr; 76(4): 66-7                                                                                                                                                                                                    | CT      | Theoretic                | Description of SNOMED | Other/multiple/unknown/not applicable | United States | 2005 |
| 388 | 655 | Grain H Clinical                                                                                                                                                                                                                                                                                                                                             | CT      | Theoretic                | Description of SNOMED | Other/multiple/unknown                | Australia     | 2010 |



| No  | Id  | Reference                                                                                                                                                              | Version | SNOMED CT Focus Category | Usage Category        | Domain                                | Country       | Year |
|-----|-----|------------------------------------------------------------------------------------------------------------------------------------------------------------------------|---------|--------------------------|-----------------------|---------------------------------------|---------------|------|
|     |     | terminology. Studies in health technology and informatics 2010; 151: 70-83                                                                                             |         |                          |                       | n/not applicable                      |               |      |
| 389 | 801 | Hastings J, Schulz S<br>Ontologies for human behavior analysis and their application to clinical data. Int Rev Neurobiol 2012;103:89-107                               | CT      | Theoretic                | Description of SNOMED | Mental                                | Switzerland   | 2012 |
| 390 | 499 | Hoskins HD, Hildebrand PL, Lum F<br>The American Academy of Ophthalmology adopts SNOMED CT as its official clinical terminology. Ophthalmology 2008 Feb; 115(2): 225-6 | CT      | Theoretic                | Description of SNOMED | Ophthalmology                         | United States | 2008 |
| 391 | 437 | Ingenerf J, Pöpl SJ<br>Biomedical vocabularies-- the demand for differentiation. Studies in health technology and informatics 2007; 129(Pt 1): 610-5                   | CT      | Theoretic                | Description of SNOMED | Other/multiple/unknown/not applicable | Germany       | 2007 |
| 392 | 217 | Kilbourne J, Williams T<br>Unicode, UTF-8, ASCII, and SNOMED CT. AMIA ... Annual Symposium proceedings / AMIA Symposium. AMIA Symposium 2003; : 892                    | CT      | Theoretic                | Description of SNOMED | Other/multiple/unknown/not applicable | United States | 2003 |
| 393 | 184 | Kim JM, Frosdick P<br>Description of a drug hierarchy in a concept-based reference terminology. Proceedings / AMIA ... Annual Symposium. AMIA Symposium 2001; : 314-8  | CT      | Theoretic                | Description of SNOMED | Drugs                                 | United States | 2001 |
| 394 | 177 | Kudla KM, Blakemore M<br>SNOMED takes the next step. Journal of AHIMA /                                                                                                | CT      | Theoretic                | Description of SNOMED | Other/multiple/unknown/not applicable | United States | 2001 |

| No  | Id  | Reference                                                                                                                                                                                                                                                              | Version | SNOMED CT Focus Category | Usage Category        | Domain                                | Country       | Year |
|-----|-----|------------------------------------------------------------------------------------------------------------------------------------------------------------------------------------------------------------------------------------------------------------------------|---------|--------------------------|-----------------------|---------------------------------------|---------------|------|
|     |     | American Health Information Management Association 2001 Jul-Aug; 72(7): 62, 64-8; quiz 69-70                                                                                                                                                                           |         |                          |                       |                                       |               |      |
| 395 | 255 | Levy B Evolving to clinical terminology. Journal of healthcare information management : JHIM 2004; 18(3): 37-43                                                                                                                                                        | CT      | Theoretic                | Description of SNOMED | Other/multiple/unknown/not applicable | United States | 2004 |
| 396 | 328 | Lunney M, Delaney C, Duffy M, Moorhead S, Welton J Advocating for standardized nursing languages in electronic health records. The Journal of nursing administration 2005 Jan; 35(1): 1-3                                                                              | CT      | Theoretic                | Description of SNOMED | Nursing                               | United States | 2005 |
| 397 | 542 | Massey KA, Ansermino JM, von Dadelszen P, Morris TJ, Liston RM, Magee LA What is SNOMED CT and why should the ISSHP care? Hypertension in pregnancy : official journal of the International Society for the Study of Hypertension in Pregnancy 2009 Feb; 28(1): 119-21 | CT      | Theoretic                | Description of SNOMED | Gynaecology                           | Canada        | 2009 |
| 398 | 632 | Nadkarni PM Drug safety surveillance using de-identified EMR and claims data: issues and challenges. Journal of the American Medical Informatics Association : JAMIA 2010 Nov-Dec; 17(6): 671-4                                                                        | CT      | Theoretic                | Description of SNOMED | Drugs                                 | United States | 2010 |
| 399 | 212 | Nash SK Nonsynonymous synonyms: correcting and improving SNOMED CT. AMIA ... Annual Symposium proceedings / AMIA                                                                                                                                                       | CT      | Theoretic                | Description of SNOMED | SNOMED CT Hierarchy                   | United States | 2003 |

| No  | Id  | Reference                                                                                                                                                                                        | Version | SNOMED CT Focus Category | Usage Category        | Domain                                | Country        | Year |
|-----|-----|--------------------------------------------------------------------------------------------------------------------------------------------------------------------------------------------------|---------|--------------------------|-----------------------|---------------------------------------|----------------|------|
|     |     | Symposium. AMIA Symposium 2003; : 949                                                                                                                                                            |         |                          |                       |                                       |                |      |
| 400 | 495 | Rector AL, Brandt S Why do it the hard way? The case for an expressive description logic for SNOMED. Journal of the American Medical Informatics Association : JAMIA 2008 Nov-Dec; 15(6): 744-51 | CT      | Theoretic                | Description of SNOMED | Other/multiple/unknown/not applicable | United Kingdom | 2008 |
| 401 | 221 | Rollins G Information technology. Help is on the way. Hospitals & health networks / AHA 2003 Sep; 77(9): 24-5                                                                                    | CT      | Theoretic                | Description of SNOMED | Other/multiple/unknown/not applicable | Unknown        | 2003 |
| 402 | 282 | Rothschild AS, Lehmann HP, Hripcsak G Inter-rater agreement in physician-coded problem lists. AMIA ... Annual Symposium proceedings / AMIA Symposium. AMIA Symposium 2005; : 644-8               | CT      | Theoretic                | Description of SNOMED | Internal medicine                     | United States  | 2005 |
| 403 | 322 | Schulz S, Hahn U, Rogers J Semantic Clarification of the Representation of Procedures and Diseases in SNOMED((R))CT. Studies in health technology and informatics 2005; 116: 773-8               | CT      | Theoretic                | Description of SNOMED | SNOMED CT Hierarchy                   | Germany        | 2005 |
| 404 | 379 | Schulz S, Hanser S, Hahn U, Rogers J The semantics of procedures and diseases in SNOMED CT. Methods of information in medicine 2006; 45(4): 354-8                                                | CT      | Theoretic                | Description of SNOMED | SNOMED CT Hierarchy                   | Germany        | 2006 |
| 405 | 476 | Schulz S, Klein GO SNOMED CT - advances in concept mapping, retrieval, and ontological foundations.                                                                                              | CT      | Theoretic                | Description of SNOMED | Other/multiple/unknown/not applicable | Germany        | 2008 |

| No  | Id  | Reference                                                                                                                                                                                              | Version | SNOMED CT Focus Category | Usage Category        | Domain                                | Country       | Year |
|-----|-----|--------------------------------------------------------------------------------------------------------------------------------------------------------------------------------------------------------|---------|--------------------------|-----------------------|---------------------------------------|---------------|------|
|     |     | Selected contributions to the Semantic Mining Conference on SNOMED CT (SMCS 2006). BMC medical informatics and decision making 2008; 8 Suppl 1: S1                                                     |         |                          |                       |                                       |               |      |
| 406 | 472 | Schulz S, Markó K, Sunitisrivaraporn B Formal representation of complex SNOMED CT expressions. BMC medical informatics and decision making 2008; 8 Suppl 1: S9                                         | CT      | Theoretic                | Description of SNOMED | Other/multiple/unknown/not applicable | Germany       | 2008 |
| 407 | 654 | Schulz S, Schober D, Daniel C, Jaulent MC Bridging the semantics gap between terminologies, ontologies, and information models. Studies in health technology and informatics 2010; 160(Pt 2): 1000-4   | CT      | Theoretic                | Description of SNOMED | Other/multiple/unknown/not applicable | Germany       | 2010 |
| 408 | 447 | Schulz S, Sunitisrivaraporn B, Baader F SNOMED CT's problem list: ontologists' and logicians' therapy suggestions. Studies in health technology and informatics 2007; 129(Pt 1): 802-6                 | CT      | Theoretic                | Description of SNOMED | Problem list / diagnoses              | Germany       | 2007 |
| 409 | 545 | Schulz S, Sunitisrivaraporn B, Baader F, Boeker M SNOMED reaching its adolescence: ontologists' and logicians' health check. International journal of medical informatics 2009 Apr; 78 Suppl 1: S86-94 | CT      | Theoretic                | Description of SNOMED | Other/multiple/unknown/not applicable | Germany       | 2009 |
| 410 | 486 | Scichilone RA The benefits of using SNOMED CT and LOINC in assessment instruments. Journal of                                                                                                          | CT      | Theoretic                | Description of SNOMED | Other/multiple/unknown/not applicable | United States | 2008 |

| No  | Id  | Reference                                                                                                                                                                                                                                                                                                                         | Version  | SNOMED CT Focus Category | Usage Category        | Domain                                | Country        | Year |
|-----|-----|-----------------------------------------------------------------------------------------------------------------------------------------------------------------------------------------------------------------------------------------------------------------------------------------------------------------------------------|----------|--------------------------|-----------------------|---------------------------------------|----------------|------|
|     |     | AHIMA / American Health Information Management Association 2008 Jul; 79(7): 56-7                                                                                                                                                                                                                                                  |          |                          |                       |                                       |                |      |
| 411 | 625 | Shahpori R, Doig C Systematized Nomenclature of Medicine-Clinical Terms direction and its implications on critical care. Journal of critical care 2010 Jun; 25(2): 364.e1-9                                                                                                                                                       | CT       | Theoretic                | Description of SNOMED | Critical care                         | Canada         | 2010 |
| 412 | 213 | Shamoun D, Livesay L Organizing the animal hierarchy into a Linnean Taxonomy in SNOMED CT. AMIA ... Annual Symposium proceedings / AMIA Symposium. AMIA Symposium 2003; : 1005                                                                                                                                                    | CT       | Theoretic                | Description of SNOMED | SNOMED CT Hierarchy                   | United States  | 2003 |
| 413 | 660 | Showell C, Cummings E, Turner P Language games and patient-centred eHealth. Studies in health technology and informatics 2010; 155: 55-61                                                                                                                                                                                         | CT       | Theoretic                | Description of SNOMED | Other/multiple/unknown/not applicable | Australia      | 2010 |
| 414 | 414 | Simpson CR, Anandan C, Fischbacher C, Lefevre K, Sheikh A Will Systematized Nomenclature of Medicine-Clinical Terms improve our understanding of the disease burden posed by allergic disorders? Clinical and experimental allergy : journal of the British Society for Allergy and Clinical Immunology 2007 Nov; 37(11): 1586-93 | CT       | Theoretic                | Description of SNOMED | Allergies                             | United Kingdom | 2007 |
| 415 | 175 | Southwick K Information please--SNOMED answers call. CAP today / College of                                                                                                                                                                                                                                                       | Multiple | Theoretic                | Description of SNOMED | Other/multiple/unknown/not applicable | United States  | 2001 |

| No  | Id  | Reference                                                                                                                                                                                                               | Version | SNOMED CT Focus Category | Usage Category        | Domain                                | Country       | Year |
|-----|-----|-------------------------------------------------------------------------------------------------------------------------------------------------------------------------------------------------------------------------|---------|--------------------------|-----------------------|---------------------------------------|---------------|------|
|     |     | American Pathologists 2001 Jan; 15(1): 54-6                                                                                                                                                                             |         |                          |                       |                                       |               |      |
| 416 | 827 | Spackman K SNOMED CT unlocks the power of clinical data for pathologists Lab. Med. 2002; 33(4): 263-266                                                                                                                 | CT      | Theoretic                | Description of SNOMED | Pathology                             | United States | 2002 |
| 417 | 283 | Spackman KA Rates of change in a large clinical terminology: three years experience with SNOMED Clinical Terms. AMIA ... Annual Symposium proceedings / AMIA Symposium. AMIA Symposium 2005; : 714-8                    | CT      | Theoretic                | Description of SNOMED | Other/multiple/unknown/not applicable | United States | 2005 |
| 418 | 248 | Spackman KA SNOMED CT milestones: endorsements are added to already-impressive standards credentials. Healthcare informatics : the business magazine for information and communication systems 2004 Sep; 21(9): 54, 56  | CT      | Theoretic                | Description of SNOMED | Other/multiple/unknown/not applicable | United States | 2004 |
| 419 | 203 | Spackman KA, Dionne R, Mays E, Weis J Role grouping as an extension to the description logic of Ontylog, motivated by concept modeling in SNOMED. Proceedings / AMIA ... Annual Symposium. AMIA Symposium 2002; : 712-6 | CT      | Theoretic                | Description of SNOMED | Other/multiple/unknown/not applicable | United States | 2002 |
| 420 | 187 | Stearns MQ, Price C, Spackman KA, Wang AY SNOMED clinical terms: overview of the development process and project status. Proceedings / AMIA ... Annual Symposium.                                                       | CT      | Theoretic                | Description of SNOMED | Other/multiple/unknown/not applicable | United States | 2001 |

| No  | Id  | Reference                                                                                                                                                                                                                                                                                                       | Version  | SNOMED CT Focus Category | Usage Category        | Domain                                | Country            | Year |
|-----|-----|-----------------------------------------------------------------------------------------------------------------------------------------------------------------------------------------------------------------------------------------------------------------------------------------------------------------|----------|--------------------------|-----------------------|---------------------------------------|--------------------|------|
|     |     | AMIA Symposium 2001; : 662-6                                                                                                                                                                                                                                                                                    |          |                          |                       |                                       |                    |      |
| 421 | 703 | Vanopstal K, Vander Stichele R, Laureys G, Buyschaert J Vocabularies and retrieval tools in biomedicine: disentangling the terminological knot. Journal of medical systems 2011 Aug; 35(4): 527-43                                                                                                              | CT       | Theoretic                | Description of SNOMED | Other/multiple/unknown/not applicable | Belgium            | 2011 |
| 422 | 800 | Venkat-Raman G, Tomson CR, Gao Y, Cornet R, Stengel B, Gronhagen-Riska C, Reid C, Jacquelinet C, Schaeffner E, Boeschoten E, Casino F, Collart F, De Meester J, Zurriaga O, Kramar R, Jager KJ, Simpson K New primary renal diagnosis codes for the ERA-EDTA. Nephrol Dial Transplant 2012 Dec;27(12):4414-4419 | CT       | Theoretic                | Description of SNOMED | Other/multiple/unknown/not applicable | Multiple countries | 2012 |
| 423 | 262 | Wagner L Data sharing on the horizon. Provider (Washington, D.C.) 2004 Jan; 30(1): 20-4, 26-7, 30-1 passim                                                                                                                                                                                                      | Multiple | Theoretic                | Description of SNOMED | Other/multiple/unknown/not applicable | United States      | 2004 |
| 424 | 185 | Wang AY, Barrett JW, Bentley T, Markwell D, Price C, Spackman KA, Stearns MQ Mapping between SNOMED RT and Clinical terms version 3: a key component of the SNOMED CT development process. Proceedings / AMIA ... Annual Symposium. AMIA Symposium 2001; : 741-5                                                | CT       | Theoretic                | Description of SNOMED | Other/multiple/unknown/not applicable | United States      | 2001 |
| 425 | 206 | Wang AY, Sable JH, Spackman KA The SNOMED clinical terms development                                                                                                                                                                                                                                            | CT       | Theoretic                | Description of SNOMED | Other/multiple/unknown/not applicable | United States      | 2002 |

| No  | Id  | Reference                                                                                                                                                                                                                                                                                            | Version | SNOMED CT Focus Category | Usage Category        | Domain                                | Country       | Year |
|-----|-----|------------------------------------------------------------------------------------------------------------------------------------------------------------------------------------------------------------------------------------------------------------------------------------------------------|---------|--------------------------|-----------------------|---------------------------------------|---------------|------|
|     |     | process: refinement and analysis of content. Proceedings / AMIA ... Annual Symposium. AMIA Symposium 2002; : 845-9                                                                                                                                                                                   |         |                          |                       |                                       |               |      |
| 426 | 219 | Warren JJ, Casey A, Konicek D, Lundberg C, Correia C, Zingo C Where is the nursing in SNOMED CT? CTGFN has the answer! AMIA ... Annual Symposium proceedings / AMIA Symposium. AMIA Symposium 2003; : 1047                                                                                           | CT      | Theoretic                | Description of SNOMED | Nursing                               | United States | 2003 |
| 427 | 455 | Wei D, Wang Y, Perl Y, Xu J, Halper M, Spackman KA, Spackman K Complexity measures to track the evolution of a SNOMED hierarchy. AMIA ... Annual Symposium proceedings / AMIA Symposium. AMIA Symposium 2008; : 778-82                                                                               | CT      | Theoretic                | Description of SNOMED | Other/multiple/unknown/not applicable | United States | 2008 |
| 428 | 366 | Yu AC Methods in biomedical ontology. Journal of biomedical informatics 2006 Jun; 39(3): 252-66                                                                                                                                                                                                      | CT      | Theoretic                | Description of SNOMED | Other/multiple/unknown/not applicable | United States | 2006 |
| 429 | 353 | Al-Mubaid H, Nguyen HA A cluster-based approach for semantic similarity in the biomedical domain. Conference proceedings : ... Annual International Conference of the IEEE Engineering in Medicine and Biology Society. IEEE Engineering in Medicine and Biology Society. Conference 2006; 1: 2713-7 | CT      | Theoretic                | Illustrate TS theory  | Other/multiple/unknown/not applicable | United States | 2006 |
| 430 | 492 | Bakhshi-Raiez F, Cornet R, de Keizer NF Development                                                                                                                                                                                                                                                  | CT      | Theoretic                | Illustrate TS theory  | Other/multiple/unknown/not applicable | Netherlands   | 2008 |



| No  | Id  | Reference                                                                                                                                                                                                            | Version | SNOMED CT Focus Category | Usage Category       | Domain                                | Country       | Year |
|-----|-----|----------------------------------------------------------------------------------------------------------------------------------------------------------------------------------------------------------------------|---------|--------------------------|----------------------|---------------------------------------|---------------|------|
|     |     | and application of a framework for maintenance of medical terminological systems. Journal of the American Medical Informatics Association : JAMIA 2008 Sep-Oct; 15(5): 687-700                                       |         |                          |                      |                                       |               |      |
| 431 | 691 | Batet M, Sánchez D, Valls A An ontology-based measure to compute semantic similarity in biomedicine. Journal of biomedical informatics 2011 Feb; 44(1): 118-25                                                       | CT      | Theoretic                | Illustrate TS theory | Other/multiple/unknown/not applicable | Spain         | 2011 |
| 432 | 521 | Bodenreider O Biomedical ontologies in action: role in knowledge management, data integration and decision support. Yearbook of medical informatics 2008; : 67-79                                                    | CT      | Theoretic                | Illustrate TS theory | Other/multiple/unknown/not applicable | United States | 2008 |
| 433 | 361 | Burgun A Desiderata for domain reference ontologies in biomedicine. Journal of biomedical informatics 2006 Jun; 39(3): 307-13                                                                                        | CT      | Theoretic                | Illustrate TS theory | Anatomy                               | France        | 2006 |
| 434 | 530 | Burkhart L, Androwich I Measuring spiritual care with informatics. ANS. Advances in nursing science 2009 Jul-Sep; 32(3): 200-10                                                                                      | CT      | Theoretic                | Illustrate TS theory | Nursing                               | United States | 2009 |
| 435 | 290 | Burkhart L, Konicek R, Moorhead S, Androwich I Mapping parish nurse documentation into the nursing interventions classification: a research method. Computers, informatics, nursing : CIN 2005 Jul-Aug; 23(4): 220-9 | CT      | Theoretic                | Illustrate TS theory | Nursing                               | United States | 2005 |

| No  | Id  | Reference                                                                                                                                                                                                                                                                                       | Version | SNOMED CT Focus Category | Usage Category       | Domain                                | Country       | Year |
|-----|-----|-------------------------------------------------------------------------------------------------------------------------------------------------------------------------------------------------------------------------------------------------------------------------------------------------|---------|--------------------------|----------------------|---------------------------------------|---------------|------|
| 436 | 367 | Ceusters W, Smith B Strategies for referent tracking in electronic health records. Journal of biomedical informatics 2006 Jun; 39(3): 362-78                                                                                                                                                    | CT      | Theoretic                | Illustrate TS theory | Other/multiple/unknown/not applicable | Germany       | 2006 |
| 437 | 443 | Chabaliier J, Mosser J, Burgun A Integrating biological pathways in disease ontologies. Studies in health technology and informatics 2007; 129(Pt 1): 791-5                                                                                                                                     | CT      | Theoretic                | Illustrate TS theory | Pathology                             | France        | 2007 |
| 438 | 606 | Ciolko E, Lu F, Joshi A Intelligent clinical decision support systems based on SNOMED CT. Conference proceedings : ... Annual International Conference of the IEEE Engineering in Medicine and Biology Society. IEEE Engineering in Medicine and Biology Society. Conference 2010; 2010: 6781-4 | CT      | Theoretic                | Illustrate TS theory | Other/multiple/unknown/not applicable | Canada        | 2010 |
| 439 | 377 | Cornet R, de Keizer NF, Abu-Hanna A A framework for characterizing terminological systems. Methods of information in medicine 2006; 45(3): 253-66                                                                                                                                               | CT      | Theoretic                | Illustrate TS theory | Other/multiple/unknown/not applicable | Netherlands   | 2006 |
| 440 | 718 | Elkin PL, Carter JS, Nabar M, Tuttle M, Lincoln M, Brown SH Drug knowledge expressed as computable semantic triples. Studies in health technology and informatics 2011; 166: 38-47                                                                                                              | CT      | Theoretic                | Illustrate TS theory | Drugs                                 | United States | 2011 |
| 441 | 532 | Elkin PL, Tuttle MS, Trusko                                                                                                                                                                                                                                                                     | CT      | Theoretic                | Illustrate TS theory | Genetics                              | United        | 2009 |

| No  | Id  | Reference                                                                                                                                                                            | Version | SNOMED CT Focus Category | Usage Category       | Domain                                | Country       | Year |
|-----|-----|--------------------------------------------------------------------------------------------------------------------------------------------------------------------------------------|---------|--------------------------|----------------------|---------------------------------------|---------------|------|
|     |     | BE, Brown SH<br>BioProspecting: novel marker discovery obtained by mining the bibleome. BMC bioinformatics 2009; 10 Suppl 2: S9                                                      |         |                          |                      |                                       | States        |      |
| 442 | 759 | Garla VN, Brandt C Semantic similarity in the biomedical domain: an evaluation across knowledge sources. BMC bioinformatics 2012 Oct 10;13(1):261                                    | CT      | Theoretic                | Illustrate TS theory | Other/multiple/unknown/not applicable | United States | 2012 |
| 443 | 659 | Hibbert M, Lohrey J, Melnikoff S Integration of data for research. Studies in health technology and informatics 2010; 151: 461-75                                                    | CT      | Theoretic                | Illustrate TS theory | Other/multiple/unknown/not applicable | Australia     | 2010 |
| 444 | 558 | Ingenerf J, Linder R Assessing applicability of ontological principles to different types of biomedical vocabularies. Methods of information in medicine 2009; 48(5): 459-67         | CT      | Theoretic                | Illustrate TS theory | Other/multiple/unknown/not applicable | Germany       | 2009 |
| 445 | 454 | Lee WN, Shah N, Sundlass K, Musen M Comparison of ontology-based semantic-similarity measures. AMIA ... Annual Symposium proceedings / AMIA Symposium. AMIA Symposium 2008; : 384-8  | CT      | Theoretic                | Illustrate TS theory | Pathology                             | United States | 2008 |
| 446 | 555 | Marenco L, Wang R, Nadkarni P Automated database mediation using ontological metadata mappings. Journal of the American Medical Informatics Association : JAMIA 2009 Sep-Oct; 16(5): | CT      | Theoretic                | Illustrate TS theory | Other/multiple/unknown/not applicable | United States | 2009 |

| No  | Id  | Reference                                                                                                                                                                                                                                      | Version | SNOMED CT Focus Category | Usage Category       | Domain                                | Country       | Year |
|-----|-----|------------------------------------------------------------------------------------------------------------------------------------------------------------------------------------------------------------------------------------------------|---------|--------------------------|----------------------|---------------------------------------|---------------|------|
|     |     | 723-37                                                                                                                                                                                                                                         |         |                          |                      |                                       |               |      |
| 447 | 803 | Martínez S, Sánchez D, Valls A A semantic framework to protect the privacy of electronic health records with non-numerical attributes. Biomed Inform 2012 Dec 8                                                                                | CT      | Theoretic                | Illustrate TS theory | Other/multiple/unknown/not applicable | Spain         | 2012 |
| 448 | 364 | Melton GB, Parsons S, Morrison FP, Rothschild AS, Markatou M, Hripcsak G Inter-patient distance metrics using SNOMED CT defining relationships. Journal of biomedical informatics 2006 Dec; 39(6): 697-705                                     | CT      | Theoretic                | Illustrate TS theory | Other/multiple/unknown/not applicable | United States | 2006 |
| 449 | 579 | Pantazatos SP, Li J, Pavlidis P, Lussier YA Integration of Neuroimaging and Microarray Datasets through Mapping and Model-Theoretic Semantic Decomposition of Unstructured Phenotypes. Summit on translational bioinformatics 2009; 2009: 85-9 | CT      | Theoretic                | Illustrate TS theory | Pathology                             | United States | 2009 |
| 450 | 423 | Pedersen T, Pakhomov SV, Patwardhan S, Chute CG Measures of semantic similarity and relatedness in the biomedical domain. Journal of biomedical informatics 2007 Jun; 40(3): 288-99                                                            | CT      | Theoretic                | Illustrate TS theory | Other/multiple/unknown/not applicable | United States | 2007 |
| 451 | 756 | Pivovarov R, Elhadad N A hybrid knowledge-based and data-driven approach to identifying semantically similar concepts. Journal of                                                                                                              | CT      | Theoretic                | Illustrate TS theory | Nephrology                            | United States | 2012 |

| No  | Id  | Reference                                                                                                                                                                                                                                                                                                   | Version | SNOMED CT Focus Category | Usage Category       | Domain                                | Country       | Year |
|-----|-----|-------------------------------------------------------------------------------------------------------------------------------------------------------------------------------------------------------------------------------------------------------------------------------------------------------------|---------|--------------------------|----------------------|---------------------------------------|---------------|------|
|     |     | biomedical informatics<br>2012 Jun;45(3):471-81                                                                                                                                                                                                                                                             |         |                          |                      |                                       |               |      |
| 452 | 207 | Rodrigues JM, Trombert Paviot B, Martin C, Vercherin P, Samuel O Co-ordination between clinical coding systems and pragmatic clinical terminologies based on a core open system: the role of ISO/TC215/WG3 and CEN/TC2511/WG2 standardisation? Studies in health technology and informatics 2002; 90: 401-5 | CT      | Theoretic                | Illustrate TS theory | Other/multiple/unknown/not applicable | France        | 2002 |
| 453 | 493 | Rosenbloom ST, Miller RA, Johnson KB, Elkin PL, Brown SH A model for evaluating interface terminologies. Journal of the American Medical Informatics Association : JAMIA 2008 Jan-Feb; 15(1): 65-76                                                                                                         | CT      | Theoretic                | Illustrate TS theory | Other/multiple/unknown/not applicable | United States | 2008 |
| 454 | 713 | Schriml LM, Arze C, Nadendla S, Chang YW, Mazaitis M, Felix V, Feng G, Kibbe WA Disease Ontology: a backbone for disease semantic integration. Nucleic acids research 2011 Nov 12;                                                                                                                          | CT      | Theoretic                | Illustrate TS theory | Genetics                              | United States | 2011 |
| 455 | 267 | Silverstein JC, Dech F, Kouchoukos PL Enhancing radiological volumes with symbolic anatomy using image fusion and collaborative virtual reality. Studies in health technology and informatics 2004; 98: 347-52                                                                                              | CT      | Theoretic                | Illustrate TS theory | Radiology                             | United States | 2004 |
| 456 | 362 | Smith B From concepts to                                                                                                                                                                                                                                                                                    | CT      | Theoretic                | Illustrate TS theory | Other/multiple/unknown                | United        | 2006 |

| No  | Id  | Reference                                                                                                                                                                                                          | Version | SNOMED CT Focus Category | Usage Category       | Domain                                | Country       | Year |
|-----|-----|--------------------------------------------------------------------------------------------------------------------------------------------------------------------------------------------------------------------|---------|--------------------------|----------------------|---------------------------------------|---------------|------|
|     |     | clinical reality: an essay on the benchmarking of biomedical terminologies. Journal of biomedical informatics 2006 Jun; 39(3): 288-98                                                                              |         |                          |                      | n/not applicable                      | States        |      |
| 457 | 644 | Smith B, Brochhausen M Putting biomedical ontologies to work. Methods of information in medicine 2010; 49(2): 135-40                                                                                               | CT      | Theoretic                | Illustrate TS theory | Other/multiple/unknown/not applicable | Germany       | 2010 |
| 458 | 277 | Smith B, Ceusters W An ontology-based methodology for the migration of biomedical terminologies to electronic health records. AMIA ... Annual Symposium proceedings / AMIA Symposium. AMIA Symposium 2005; : 704-8 | CT      | Theoretic                | Illustrate TS theory | Other/multiple/unknown/not applicable | United States | 2005 |
| 459 | 817 | Souvignet J, Declerck G, Trombert B, Rodrigues JM, Jaulent MC, Bousquet C Evaluation of automated term groupings for detecting anaphylactic shock signals for drugs. AMIA Annu Symp Proc 2012;2012:882-90          | CT      | Theoretic                | Illustrate TS theory | Drugs                                 | France        | 2012 |
| 460 | 431 | Wilson PS What mapping and modeling means to the HIM professional. Perspectives in health information management / AHIMA, American Health Information Management Association 2007; 4: 2                            | CT      | Theoretic                | Illustrate TS theory | Other/multiple/unknown/not applicable | United States | 2007 |
| 461 | 808 | Wu S, Liu H Semantic characteristics of NLP-extracted concepts in                                                                                                                                                  | CT      | Theoretic                | Illustrate TS theory | Other/multiple/unknown/not applicable | United States | 2011 |

| No  | Id  | Reference                                                                                                                                                                                                                 | Version | SNOMED CT Focus Category | Usage Category    | Domain                                | Country       | Year |
|-----|-----|---------------------------------------------------------------------------------------------------------------------------------------------------------------------------------------------------------------------------|---------|--------------------------|-------------------|---------------------------------------|---------------|------|
|     |     | clinical notes vs. biomedical literature. AMIA Annu Symp Proc 2011;2011:1550-8                                                                                                                                            |         |                          |                   |                                       |               |      |
| 462 | 588 | Agrawal A, Elhanan G, Halper M Dissimilarities in the Logical Modeling of Apparently Similar Concepts in SNOMED CT. AMIA ... Annual Symposium proceedings / AMIA Symposium. AMIA Symposium 2010; 2010: 212-6              | CT      | Theoretic                | Terminology audit | Wounds                                | United States | 2010 |
| 463 | 407 | Bodenreider O, Smith B, Kumar A, Burgun A Investigating subsumption in SNOMED CT: an exploration into large description logic-based biomedical terminologies. Artificial intelligence in medicine 2007 Mar; 39(3): 183-95 | CT      | Theoretic                | Terminology audit | Other/multiple/unknown/not applicable | United States | 2007 |
| 464 | 278 | Burgun A, Bodenreider O, Mougin F Classifying diseases with respect to anatomy: a study in SNOMED CT. AMIA ... Annual Symposium proceedings / AMIA Symposium. AMIA Symposium 2005; : 91-5                                 | CT      | Theoretic                | Terminology audit | Other/multiple/unknown/not applicable | France        | 2005 |
| 465 | 586 | Ceusters W Applying Evolutionary Terminology Auditing to SNOMED CT. AMIA ... Annual Symposium proceedings / AMIA Symposium. AMIA Symposium 2010; 2010: 96-100                                                             | CT      | Theoretic                | Terminology audit | Other/multiple/unknown/not applicable | United States | 2010 |
| 466 | 270 | Ceusters W, Smith B, Kumar A, Dhaen C Mistakes in                                                                                                                                                                         | CT      | Theoretic                | Terminology audit | Other/multiple/unknown/not applicable | United States | 2004 |

| No  | Id  | Reference                                                                                                                                                                                                  | Version | SNOMED CT Focus Category | Usage Category    | Domain                                | Country       | Year |
|-----|-----|------------------------------------------------------------------------------------------------------------------------------------------------------------------------------------------------------------|---------|--------------------------|-------------------|---------------------------------------|---------------|------|
|     |     | medical ontologies: where do they come from and how can they be detected? Studies in health technology and informatics 2004; 102: 145-63                                                                   |         |                          |                   |                                       |               |      |
| 467 | 271 | Ceusters W, Smith B, Kumar A, Dhaen C Ontology-based error detection in SNOMED-CT. Studies in health technology and informatics 2004; 107(Pt 1): 482-6                                                     | CT      | Theoretic                | Terminology audit | Other/multiple/unknown/not applicable | United States | 2004 |
| 468 | 812 | Geller J, Ochs C, Perl Y, Xu J New abstraction networks and a new visualization tool in support of auditing the SNOMED CT content. AMIA Annu Symp Proc 2012;2012:237-46                                    | CT      | Theoretic                | Terminology audit | SNOMED CT Hierarchy                   | United States | 2012 |
| 469 | 399 | Halper M, Wang Y, Min H, Chen Y, Hripcsak G, Perl Y, Spackman KA Analysis of error concentrations in SNOMED. AMIA ... Annual Symposium proceedings / AMIA Symposium. AMIA Symposium 2007; : 314-8          | CT      | Theoretic                | Terminology audit | Other/multiple/unknown/not applicable | United States | 2007 |
| 470 | 475 | Héja G, Surján G, Varga P Ontological analysis of SNOMED CT. BMC medical informatics and decision making 2008; 8 Suppl 1: S8                                                                               | CT      | Theoretic                | Terminology audit | Other/multiple/unknown/not applicable | Hungary       | 2008 |
| 471 | 587 | Huang KC, Geller J, Elhanan G, Perl Y, Halper M Auditing SNOMED Integration into the UMLS for Duplicate Concepts. AMIA ... Annual Symposium proceedings / AMIA Symposium. AMIA Symposium 2010; 2010: 321-5 | CT      | Theoretic                | Terminology audit | Other/multiple/unknown/not applicable | United States | 2010 |



| No  | Id  | Reference                                                                                                                                                                                                                                          | Version | SNOMED CT Focus Category | Usage Category    | Domain                                | Country        | Year |
|-----|-----|----------------------------------------------------------------------------------------------------------------------------------------------------------------------------------------------------------------------------------------------------|---------|--------------------------|-------------------|---------------------------------------|----------------|------|
| 472 | 554 | Jiang G, Chute CG Auditing the semantic completeness of SNOMED CT using formal concept analysis. Journal of the American Medical Informatics Association : JAMIA 2009 Jan-Feb; 16(1): 89-102                                                       | CT      | Theoretic                | Terminology audit | SNOMED CT Hierarchy                   | United States  | 2009 |
| 473 | 814 | Kreuzthaler M, Schulz S Metonymies in medical terminologies. A SNOMED CT case study. AMIA Annu Symp Proc 2012;2012:463-7                                                                                                                           | CT      | Theoretic                | Terminology audit | Other/multiple/unknown/not applicable | Australia      | 2012 |
| 474 | 804 | Mikroyannidi E, Stevens R, Iannone L, Rector A Analysing Syntactic Regularities and Irregularities in SNOMED-CT. J Biomed Semantics 2012 Dec 17;3(1):8                                                                                             | CT      | Theoretic                | Terminology audit | Other/multiple/unknown/not applicable | United Kingdom | 2012 |
| 475 | 524 | Pacheco E, Stenzhorn H, Nohama P, Paetzold J, Schulz S Detecting Underspecification in SNOMED CT concept definitions through natural language processing. AMIA ... Annual Symposium proceedings / AMIA Symposium. AMIA Symposium 2009; 2009: 492-6 | CT      | Theoretic                | Terminology audit | Other/multiple/unknown/not applicable | Brazil         | 2009 |
| 476 | 696 | Rector A, Iannone L Lexically suggest, logically define: Quality assurance of the use of qualifiers and expected results of post-coordination in SNOMED CT. Journal of biomedical informatics 2011 Oct 14;                                         | CT      | Theoretic                | Terminology audit | Problem list / diagnoses              | United Kingdom | 2011 |

| No  | Id  | Reference                                                                                                                                                                                                                                            | Version | SNOMED CT Focus Category | Usage Category    | Domain                                | Country        | Year |
|-----|-----|------------------------------------------------------------------------------------------------------------------------------------------------------------------------------------------------------------------------------------------------------|---------|--------------------------|-------------------|---------------------------------------|----------------|------|
| 477 | 706 | Rector AL, Brandt S, Schneider T Getting the foot out of the pelvis: modeling problems affecting use of SNOMED CT hierarchies in practical applications. Journal of the American Medical Informatics Association : JAMIA 2011 Jul-Aug; 18(4): 432-40 | CT      | Theoretic                | Terminology audit | Problem list / diagnoses              | United Kingdom | 2011 |
| 478 | 183 | Sable JH, Nash SK, Wang AY Culling a clinical terminology: a systematic approach to identifying problematic content. Proceedings / AMIA ... Annual Symposium. AMIA Symposium 2001; : 578-82                                                          | CT      | Theoretic                | Terminology audit | Other/multiple/unknown/not applicable | United States  | 2001 |
| 479 | 815 | Schulz S, Rector A, Rodrigues JM, Spackman K Competing interpretations of disorder codes in SNOMED CT and ICD. AMIA Annu Symp Proc 2012;2012:819-27                                                                                                  | CT      | Theoretic                | Terminology audit | Problem list / diagnoses              | Austria        | 2012 |
| 480 | 698 | Schulz S, Spackman K, James A, Cocos C, Boeker M Scalable representations of diseases in biomedical ontologies. Journal of biomedical semantics 2011; 2 Suppl 2: S6                                                                                  | CT      | Theoretic                | Terminology audit | Pathology                             | Austria        | 2011 |
| 481 | 598 | Wang J, Day R, Visweswaran S, Hogan W The use of semantic distance metrics to support ontology audit. AMIA ... Annual Symposium proceedings / AMIA Symposium. AMIA Symposium 2010; 2010: 842-6                                                       | CT      | Theoretic                | Terminology audit | Anatomy                               | United States  | 2010 |

| No  | Id  | Reference                                                                                                                                                                                                                                  | Version | SNOMED CT Focus Category | Usage Category    | Domain                                | Country       | Year |
|-----|-----|--------------------------------------------------------------------------------------------------------------------------------------------------------------------------------------------------------------------------------------------|---------|--------------------------|-------------------|---------------------------------------|---------------|------|
| 482 | 424 | Wang Y, Halper M, Min H, Perl Y, Chen Y, Spackman KA Structural methodologies for auditing SNOMED. Journal of biomedical informatics 2007 Oct; 40(5): 561-81                                                                               | CT      | Theoretic                | Terminology audit | Other/multiple/unknown/not applicable | United States | 2007 |
| 483 | 692 | Wang Y, Halper M, Wei D, Gu H, Perl Y, Xu J, Elhanan G, Chen Y, Spackman KA, Case JT, Hripcsak G Auditing complex concepts of SNOMED using a refined hierarchical abstraction network. Journal of biomedical informatics 2011 Sep 1;       | CT      | Theoretic                | Terminology audit | Other/multiple/unknown/not applicable | United States | 2011 |
| 484 | 689 | Wang Y, Halper M, Wei D, Perl Y, Geller J Abstraction of complex concepts with a refined partial-area taxonomy of SNOMED. Journal of biomedical informatics 2011 Aug 25;                                                                   | CT      | Theoretic                | Terminology audit | Other/multiple/unknown/not applicable | United States | 2011 |
| 485 | 453 | Wang Y, Wei D, Xu J, Elhanan G, Perl Y, Halper M, Chen Y, Spackman KA, Hripcsak G Auditing complex concepts in overlapping subsets of SNOMED. AMIA ... Annual Symposium proceedings / AMIA Symposium. AMIA Symposium 2008; : 273-7         | CT      | Theoretic                | Terminology audit | Other/multiple/unknown/not applicable | United States | 2008 |
| 486 | 665 | Wei D, Bodenreider O Using the abstraction network in complement to description logics for quality assurance in biomedical terminologies - a case study in SNOMED CT. Studies in health technology and informatics 2010; 160(Pt 2): 1070-4 | CT      | Theoretic                | Terminology audit | Other/multiple/unknown/not applicable | United States | 2010 |

| No  | Id  | Reference                                                                                                                                                                                                                      | Version | SNOMED CT Focus Category | Usage Category    | Domain                                | Country       | Year |
|-----|-----|--------------------------------------------------------------------------------------------------------------------------------------------------------------------------------------------------------------------------------|---------|--------------------------|-------------------|---------------------------------------|---------------|------|
| 487 | 523 | Wei D, Halper M, Elhanan G, Chen Y, Perl Y, Geller J, Spackman KA Auditing SNOMED relationships using a converse abstraction network. AMIA ... Annual Symposium proceedings / AMIA Symposium. AMIA Symposium 2009; 2009: 685-9 | CT      | Theoretic                | Terminology audit | SNOMED CT Hierarchy                   | United States | 2009 |
| 488 | 591 | Zhang GQ, Bodenreider O Large-scale, Exhaustive Lattice-based Structural Auditing of SNOMED CT. AMIA ... Annual Symposium proceedings / AMIA Symposium. AMIA Symposium 2010; 2010: 922-6                                       | CT      | Theoretic                | Terminology audit | Other/multiple/unknown/not applicable | United States | 2010 |
