# Supplementary material
Source: PubMed Central journal article supplement (PMC3957381)
Supplement: amiajnl-2013-001636-s4.pdf [file amiajnl-2013-001636-s4.pdf]

## Appendix D: Comparison between PubMed and JAMIA

PubMed Search Strategy:

("systematized nomenclature of medicine"[MeSH Terms] OR ("systematized"[All Fields] AND "nomenclature"[All Fields] AND "medicine"[All Fields]) OR "systematized nomenclature of medicine"[All Fields] OR "snomed"[All Fields]) AND ("J Am Med Inform Assoc"[Journal] OR "jamia"[All Fields])) AND ("2001/01/01"[PDAT] : "2012/12/31"[PDAT])

JAMIA Search Strategy (title or abstract):

The screenshot shows the JAMIA website interface. At the top left is the JAMIA logo. Below it is the tagline "A scholarly journal of informatics in health and biomecinine". A navigation bar contains links for "Online First", "Current issue", "Archive", "About the journal", "Submit a paper", "Subscribe", and "Help". Below the navigation bar is a search bar with the text "Search this site" and a magnifying glass icon, and a link for "Advanced search". The main content area displays the search results for "snomed" in titles and abstracts from Jan 2001 through Dec 2012. It includes a "New Search" button, a "Displaying results 1-24 of 24" message, and a "Modify Results" panel with options for citation format (standard), results per page (10), and results order (relevance).

JAMIA Search Strategy (full text):

The screenshot shows the JAMIA website interface. At the top left is the JAMIA logo. Below it is the tagline "A scholarly journal of informatics in health and biomecinine". A navigation bar contains links for "Online First", "Current issue", "Archive", "About the journal", "Submit a paper", "Subscribe", and "Help". Below the navigation bar is a search bar with the text "snomed" and a magnifying glass icon, and a link for "Advanced search". The main content area displays the search results for "snomed" in full text from Jan 2001 through Dec 2012. It includes a "New Search" button, a "Next 42" button, a "Displaying results 1-125 of 167" message, and a "Modify Results" panel with options for citation format (standard), results per page (10), and results order (relevance).

Paper by Paper Comparison

| No | Reference                                                                                                                                                                                                                   | JAMIA | PubMed |
|----|-----------------------------------------------------------------------------------------------------------------------------------------------------------------------------------------------------------------------------|-------|--------|
| 1. | Strauss JA, Chao CR, Kwan ML, Ahmed SA, Schottinger JE, Quinn VP. <b>Identifying primary and recurrent cancers using a SAS-based natural language processing algorithm.</b> J Am Med Inform Assoc. 2013 Mar 1;20(2):349-55. |       | Y      |
| 2. | Wu ST, Liu H, Li D, Tao C, Musen MA, Chute CG, Shah NH. <b>Unified Medical Language System term occurrences in clinical notes: a large-scale corpus analysis.</b> J Am Med Inform Assoc. 2012 Jun;19(1e):e149-56.           |       | Y      |

|     |                                                                                                                                                                                                                                                                        |   |   |
|-----|------------------------------------------------------------------------------------------------------------------------------------------------------------------------------------------------------------------------------------------------------------------------|---|---|
| 3.  | López-García P, Boeker M, Illarramendi A, Schulz S. <b>Usability-driven pruning of large ontologies: the case of SNOMED CT.</b> J Am Med Inform Assoc. 2012 Jun;19(1e):e102-9.                                                                                         | Y | Y |
| 4.  | Elhanan G, Perl Y, Geller J. <b>A survey of SNOMED CT direct users, 2010: impressions and preferences regarding content and quality.</b> J Am Med Inform Assoc. 2011 Dec;18 Suppl 1:i36-44.                                                                            | Y | Y |
| 5.  | Liu H, Burkhart Q, Bell DS. <b>Evaluation of the NCPDP Structured and Codified Sig Format for e-prescriptions.</b> J Am Med Inform Assoc. 2011 Sep-Oct;18(5):645-51.                                                                                                   |   | Y |
| 6.  | Pathak J, Wang J, Kashyap S, Basford M, Li R, Masys DR, Chute CG. <b>Mapping clinical phenotype data elements to standardized metadata repositories and controlled terminologies: the eMERGE Network experience.</b> J Am Med Inform Assoc. 2011 Jul-Aug;18(4):376-86. |   | Y |
| 7.  | Rector AL, Brandt S, Schneider T. <b>Getting the foot out of the pelvis: modeling problems affecting use of SNOMED CT hierarchies in practical applications.</b> J Am Med Inform Assoc. 2011 Jul-Aug;18(4):432-40.                                                     | Y | Y |
| 8.  | Fung KW, McDonald C, Srinivasan S. <b>The UMLS-CORE project: a study of the problem list terminologies used in large healthcare institutions.</b> J Am Med Inform Assoc. 2010 Nov-Dec;17(6):675-80.                                                                    |   | Y |
| 9.  | Nadkarni PM. <b>Drug safety surveillance using de-identified EMR and claims data: issues and challenges.</b> J Am Med Inform Assoc. 2010 Nov-Dec;17(6):671-4                                                                                                           |   | Y |
| 10. | Wilcke JR, Green JM, Spackman KA, Martin MK, Case JT, Santamaria SL, Zimmerman K. <b>Concerning SNOMED-CT content for public health case reports.</b> J Am Med Inform Assoc. 2010 Sep-Oct;17(5):613; author reply 613-4.                                               | Y | Y |
| 11. | Nadkarni PM, Darer JA. <b>Migrating existing clinical content from ICD-9 to SNOMED.</b> J Am Med Inform Assoc. 2010 Sep-Oct;17(5):602-7                                                                                                                                | Y | Y |
| 12. | Rajeev D, Staes CJ, Evans SR, Mottice S, Rolfs R, Samore MH, Whitney J, Kurzban R, Huff SM. <b>Concerning SNOMED-CT content for public health case reports.</b> J Am Med Inform Assoc 2010;17:5 613-614.                                                               | Y |   |
| 13. | Nguyen AN, Lawley MJ, Hansen DP, Bowman RV, Clarke BE, Duhig EE, Colquist S. <b>Symbolic rule-based classification of lung cancer stages from free-text pathology reports.</b> J Am Med Inform Assoc. 2010 Jul-Aug;17(4):440-5.                                        |   | Y |
| 14. | Nadkarni PM, Marengo LA. <b>Implementing description-logic rules for SNOMED-CT attributes through a table-driven approach.</b> J Am Med Inform Assoc. 2010 Mar-Apr;17(2):182-4.                                                                                        | Y | Y |
| 15. | Rajeev D, Staes CJ, Evans RS, Mottice S, Rolfs R, Samore MH, Whitney J, Kurzban R, Huff SM. <b>Development of an electronic public health case report using HL7 v2.5 to meet public health needs.</b> J Am Med Inform Assoc. 2010 Jan-Feb;17(1):34-41                  |   | Y |
| 16. | Marengo L, Wang R, Nadkarni P. <b>Automated database mediation using ontological metadata mappings.</b> J Am Med Inform Assoc. 2009 Sep-Oct;16(5):723-37                                                                                                               |   | Y |
| 17. | Pathak J, Solbrig HR, Buntrock JD, Johnson TM, Chute CG. <b>LexGrid: a framework for representing, storing, and querying biomedical terminologies from simple to sublime.</b> J Am Med Inform Assoc. 2009 May-Jun;16(3):305-15.                                        |   | Y |
| 18. | Jiang G, Chute CG. <b>Auditing the semantic completeness of SNOMED CT using formal concept analysis.</b> J Am Med Inform Assoc. 2009 Jan-                                                                                                                              | Y | Y |

|     |                                                                                                                                                                                                                                                                                                |   |   |
|-----|------------------------------------------------------------------------------------------------------------------------------------------------------------------------------------------------------------------------------------------------------------------------------------------------|---|---|
|     | Feb;16(1):89-102.                                                                                                                                                                                                                                                                              |   |   |
| 19. | Rosenbloom ST, Brown SH, Froehling D, Bauer BA, Wahner-Roedler DL, Gregg WM, Elkin PL. <b>Using SNOMED CT to represent two interface terminologies.</b> J Am Med Inform Assoc. 2009 Jan-Feb;16(1):81-8.                                                                                        | Y | Y |
| 20. | Rector AL, Brandt S. <b>Why do it the hard way? The case for an expressive description logic for SNOMED.</b> J Am Med Inform Assoc. 2008 Nov-Dec;15(6):744-51.                                                                                                                                 | Y | Y |
| 21. | Bouhaddou O, Warnekar P, Parrish F, Do N, Mandel J, Kilbourne J, Lincoln MJ. <b>Exchange of computable patient data between the Department of Veterans Affairs (VA) and the Department of Defense (DoD): terminology mediation strategy.</b> J Am Med Inform Assoc. 2008 Mar-Apr;15(2):174-83. |   | Y |
| 22. | Rosenbloom ST, Miller RA, Johnson KB, Elkin PL, Brown SH. <b>A model for evaluating interface terminologies.</b> J Am Med Inform Assoc. 2008 Jan-Feb;15(1):65-76.                                                                                                                              |   | Y |
| 23. | Andrews JE, Richesson RL, Krischer J. <b>Variation of SNOMED CT coding of clinical research concepts among coding experts.</b> J Am Med Inform Assoc. 2007 Jul-Aug;14(4):497-506.                                                                                                              | Y | Y |
| 24. | Chen Y, Perl Y, Geller J, Cimino JJ. <b>Analysis of a study of the users, uses, and future agenda of the UMLS.</b> J Am Med Inform Assoc. 2007 Mar-Apr;14(2):221-31.                                                                                                                           |   | Y |
| 25. | Richesson RL, Andrews JE, Krischer JP. <b>Use of SNOMED CT to represent clinical research data: a semantic characterization of data items on case report forms in vasculitis research.</b> J Am Med Inform Assoc. 2006 Sep-Oct;13(5):536-46.                                                   | Y | Y |
| 26. | Rosenbloom ST, Miller RA, Johnson KB, Elkin PL, Brown SH. <b>Interface terminologies: facilitating direct entry of clinical data into electronic health record systems.</b> J Am Med Inform Assoc. 2006 May-Jun;13(3):277-88.                                                                  |   | Y |
| 27. | Green JM, Wilcke JR, Abbott J, Rees LP. <b>Development and evaluation of methods for structured recording of heart murmur findings using SNOMED-CT post-coordination.</b> J Am Med Inform Assoc. 2006 May-Jun;13(3):321-33. Epub 2006 Feb 24.                                                  | Y | Y |
| 28. | Fung KW, Hole WT, Nelson SJ, Srinivasan S, Powell T, Roth L. <b>Integrating SNOMED CT into the UMLS: an exploration of different views of synonymy and quality of editing.</b> J Am Med Inform Assoc. 2005 Jul-Aug;12(4):486-94.                                                               | Y | Y |
